# Supplementary material for: Defining Essentiality Score of Protein-Coding Genes and Long Noncoding RNAs
Source: Front Genet. 2018 Oct 9;9:380. doi: 10.3389/fgene.2018.00380 (PMC6189311; doi:10.3389/fgene.2018.00380)
Supplement: FILE S5 — GIC score and number of publications of genes. [file Table_5.XLSX]

## Sheet: Sheet1
Supplementary File 5. GIC score and number of publications of genes.
gene	GIC score	number of publications
NBPF20	0.957559	1
SP9	0.838885	1
C11orf96	0.77155	1
ZNF837	0.768918	1
PRAC2	0.751422	1
CBY3	0.738019	1
TMEM170B	0.73767	1
TMEM238	0.727829	1
NUPR1L	0.726407	1
TCEB3CL2	0.720916	1
SYCE1L	0.699034	1
RPRML	0.698744	1
ANKRD63	0.659801	1
MT1HL1	0.645432	1
TPBGL	0.643673	1
ZNF835	0.643595	1
LKAAEAR1	0.636744	1
TMEM88B	0.635143	1
BIVM-ERCC5	0.62072	1
FAM47C	0.616263	1
PRR23C	0.601763	1
SHISA8	0.59771	1
ZNF850	0.595549	1
GOLGA6C	0.583821	1
BTBD17	0.571406	1
HSPE1-MOB4	0.566693	1
GOLGA8N	0.561878	1
GOLGA6D	0.559888	1
C19orf67	0.553463	1
GOLGA8R	0.543822	1
C17orf98	0.542814	1
UQCRHL	0.541828	1
C11orf94	0.540096	1
CT47A6	0.53467	1
CT47A1	0.534042	1
CT47A10	0.533304	1
CT47A9	0.533304	1
CT47A8	0.533304	1
CT47A5	0.533304	1
CT47A4	0.533304	1
CT47A3	0.533304	1
CT47A2	0.533304	1
CT47A12	0.533304	1
C2orf81	0.529137	1
CT47B1	0.527182	1
C2CD4D	0.521059	1
CT47A7	0.517227	1
POM121L12	0.515701	1
XKR7	0.507664	1
FAM155B	0.505897	1
LDLRAD2	0.504994	1
C11orf91	0.494047	1
FAM71E1	0.491885	1
ANKRD34C	0.491274	1
CLLU1OS	0.487706	1
SPDYE5	0.482341	1
XKR5	0.482325	1
BTBD19	0.477767	1
C5orf47	0.475671	1
LACTBL1	0.47322	1
ANKRD20A4	0.470279	1
PRR23A	0.469438	1
MSANTD3-TMEFF1	0.466837	1
C11orf88	0.463564	1
C10orf105	0.463132	1
FAM72C	0.46171	1
TMEM8C	0.459653	1
SPDYE2B	0.453561	1
TMEM249	0.448751	1
PODNL1	0.444777	1
MMD2	0.440979	1
RHOXF2B	0.433187	1
SMIM10	0.432545	1
C19orf71	0.430758	1
FOXB2	0.425134	1
PRR25	0.425031	1
ENO4	0.423149	1
EVPLL	0.422427	1
OR2T8	0.422001	1
PRR20B	0.41786	1
PRR20D	0.41786	1
SLCO1B7	0.409978	1
NDUFC2-KCTD14	0.408902	1
AGAP6	0.408131	1
DEFB133	0.406367	1
MINOS1-NBL1	0.405892	1
SPDYE4	0.404089	1
TMEM247	0.402963	1
RPL17-C18orf32	0.397363	1
GRAPL	0.388136	1
THEGL	0.386622	1
C17orf74	0.383948	1
KRTAP6-2	0.380754	1
AADACL3	0.379001	1
NPIPB6	0.378787	1
TTC24	0.37836	1
SPATA31A5	0.378124	1
SPATA31A6	0.378098	1
DPRX	0.375368	1
TSPY3	0.372993	1
C5orf63	0.368163	1
NUTM2G	0.368155	1
RD3L	0.365191	1
C6orf52	0.363266	1
TEX22	0.363189	1
OR11H6	0.353729	1
TSPY8	0.352964	1
CTXN2	0.351958	1
TMEM105	0.34881	1
AQP12B	0.347283	1
CTAGE15	0.346652	1
ARL14EPL	0.344637	1
LIPK	0.339437	1
ZNF705A	0.331012	1
C4orf51	0.327998	1
PRAMEF14	0.327654	1
C19orf84	0.327185	1
ACCSL	0.32698	1
SLC22A31	0.32471	1
STMND1	0.324601	1
FAM25G	0.322797	1
KRTAP21-2	0.320309	1
ETV3L	0.317951	1
OR9Q2	0.315255	1
GAGE12F	0.312865	1
SPECC1L-ADORA2A	0.312231	1
ST20-MTHFS	0.311524	1
C8orf86	0.311495	1
HRCT1	0.309055	1
FAM180B	0.307718	1
ARSH	0.305935	1
LRRC66	0.303608	1
PPIAL4F	0.302665	1
C9orf129	0.301664	1
ZNF878	0.299827	1
TMEM262	0.297436	1
MBD3L4	0.293902	1
LGALS16	0.292678	1
EPPIN-WFDC6	0.291992	1
OR52J3	0.291587	1
MBD3L3	0.28817	1
C11orf86	0.287048	1
FAM229B	0.284731	1
KIAA1024L	0.281958	1
FAM177B	0.280476	1
CFC1B	0.274745	1
GAGE12G	0.270968	1
TMEM156	0.270867	1
OTOP2	0.269433	1
MANSC4	0.26775	1
MBD3L5	0.267078	1
SMCO2	0.265333	1
OR4K13	0.264437	1
ALG1L2	0.264307	1
PRAMEF12	0.264189	1
ERICH4	0.260339	1
C12orf71	0.258659	1
TMPRSS11F	0.253334	1
WDR38	0.248579	1
DYTN	0.246001	1
NPIPA8	0.244536	1
OR2T27	0.242984	1
OR6C6	0.237218	1
OR2L5	0.237034	1
OR11H12	0.236329	1
NPIPA3	0.232895	1
NPIPA2	0.231216	1
OR10G9	0.229264	1
GTSF1L	0.229042	1
OR8K5	0.225296	1
OR11H2	0.224766	1
OR4N5	0.223846	1
KRTAP29-1	0.22205	1
OR4C15	0.22058	1
OR4F5	0.220135	1
TMEM210	0.218796	1
TRIM64C	0.217157	1
VSTM5	0.215586	1
OR51T1	0.215243	1
OR6C76	0.215023	1
OR2L3	0.211931	1
SPINK14	0.205587	1
CEACAM18	0.205208	1
PRR23D2	0.204821	1
OR5B3	0.204645	1
OR8H3	0.203181	1
OR52E2	0.202686	1
OR4K17	0.201771	1
OR14A16	0.200985	1
SMIM22	0.200654	1
OR4L1	0.197796	1
OR52N1	0.193825	1
OR6N2	0.192607	1
TRIM49B	0.191618	1
KRTAP5-3	0.191473	1
OR5H1	0.190191	1
KRTAP5-4	0.181486	1
KRTAP19-2	0.180891	1
OR5AS1	0.176502	1
OR2M5	0.172971	1
OR4P4	0.17175	1
OR52B6	0.167229	1
MAGEB5	0.163724	1
OR6C75	0.157294	1
OR8U1	0.154237	1
OR6C68	0.148555	1
OR1L1	0.143807	1
KRTAP25-1	0.139279	1
OR5B17	0.132954	1
OR56A3	0.131873	1
OR51A4	0.131598	1
FAM231A	0.130238	1
OR56A5	0.124779	1
OR2AP1	0.120625	1
TMEM244	0.115618	1
OR8B3	0.106618	1
OR2T4	0.089186	1
PROB1	0.772284	2
CKLF-CMTM1	0.749455	2
LY75-CD302	0.739018	2
CCDC177	0.713261	2
PPP1R3G	0.703246	2
DBX1	0.699429	2
URAD	0.689044	2
C5orf52	0.682436	2
C6orf132	0.678805	2
RIMBP3B	0.676573	2
DEFB135	0.67016	2
TCEB3CL	0.657684	2
ARIH2OS	0.656532	2
PLCXD3	0.646805	2
A3GALT2	0.628558	2
TMEM200C	0.626468	2
ZFP92	0.624646	2
CORO7-PAM16	0.617165	2
SOWAHD	0.608632	2
GPR27	0.603977	2
MRGPRG	0.600706	2
KCP	0.598366	2
C3orf80	0.596077	2
POC1B-GALNT4	0.59588	2
LRRC10B	0.590915	2
FER1L6	0.581321	2
ADM5	0.579723	2
PRR18	0.578379	2
LRRC43	0.575121	2
TMEM191B	0.57032	2
PRR23B	0.56128	2
GOLGA8M	0.558501	2
SMIM13	0.550677	2
TGFBR3L	0.547709	2
GOLGA8K	0.529568	2
LANCL3	0.527399	2
GOLGA8H	0.525089	2
MSANTD1	0.523437	2
C17orf100	0.516568	2
TMEM215	0.515868	2
C1orf233	0.515587	2
TMEM256-PLSCR3	0.513716	2
GOLGA8J	0.511476	2
LCN9	0.50991	2
NOTO	0.505931	2
IGFLR1	0.50425	2
RPL36A-HNRNPH2	0.50313	2
ANKRD18B	0.503043	2
TMEM82	0.501752	2
GRXCR2	0.501028	2
GFY	0.500643	2
ACTL10	0.499162	2
NTN5	0.498848	2
PABPC1L2A	0.492907	2
GOLGA6L6	0.488415	2
KIAA0895L	0.486441	2
FAM159B	0.485141	2
ANKRD20A2	0.483474	2
TMEM80	0.483391	2
ANKRD20A3	0.483099	2
SPDYE1	0.48294	2
C1orf194	0.480217	2
CCDC175	0.476853	2
NT5C1B-RDH14	0.474672	2
C1orf228	0.471943	2
ANKRD34B	0.471386	2
DBX2	0.467495	2
LUZP6	0.465389	2
PABPC1L2B	0.464349	2
GOLGA6L1	0.456757	2
SLC9C2	0.449716	2
C2orf70	0.448076	2
LCNL1	0.44155	2
ARGFX	0.437711	2
TMEM200B	0.435962	2
MS4A13	0.435696	2
SMIM7	0.433513	2
MPND	0.432073	2
ZNF654	0.429816	2
AGAP5	0.427625	2
AGAP9	0.423839	2
C16orf86	0.423339	2
LRRC63	0.422012	2
RAB44	0.419452	2
C17orf58	0.419392	2
PRR20C	0.41786	2
C5orf49	0.417059	2
CCDC153	0.414825	2
DUXA	0.414765	2
TMEM31	0.413557	2
TMEM179	0.410754	2
CCDC152	0.406994	2
ITIH6	0.402839	2
C18orf42	0.401284	2
NUTM2A	0.400844	2
RNF215	0.40051	2
TCP10L2	0.397883	2
FAM205A	0.397115	2
SPATA31D3	0.39369	2
C1orf146	0.392745	2
CYB5RL	0.391126	2
C6orf222	0.390557	2
GCNT7	0.389943	2
IGLON5	0.38878	2
OR11H4	0.387997	2
TMEM235	0.387375	2
SMIM15	0.386139	2
C19orf38	0.384342	2
SYNJ2BP-COX16	0.381735	2
PRAMEF20	0.379973	2
MROH9	0.378581	2
KHDC1L	0.376802	2
TTC34	0.374313	2
ALG1L	0.370829	2
ZNF286B	0.37022	2
C16orf71	0.370058	2
NPIPB9	0.364735	2
KRTAP20-3	0.361619	2
MDH1B	0.360879	2
SNTN	0.359652	2
BCL2L2-PABPN1	0.359381	2
SLC35E4	0.358625	2
OR6S1	0.357249	2
C6orf223	0.35708	2
AQP12A	0.356393	2
PGPEP1L	0.355962	2
SMIM17	0.355221	2
GCNT4	0.352238	2
ZNF729	0.351812	2
KRTAP4-6	0.349926	2
TMEM253	0.349486	2
ZNF442	0.347798	2
OR10Q1	0.347183	2
TP53TG3D	0.34637	2
CCDC169-SOHLH2	0.345449	2
TMEM42	0.344995	2
TLDC2	0.344349	2
TEN1-CDK3	0.343983	2
CCDC182	0.342144	2
AADACL4	0.341746	2
DEFB4B	0.341102	2
TSPY10	0.34073	2
OVCH1	0.339799	2
FAM25C	0.33845	2
OR5C1	0.338242	2
MCMDC2	0.338233	2
DEFB136	0.337919	2
TGIF2-C20orf24	0.337563	2
SPATA21	0.336813	2
KRTAP12-3	0.335463	2
OR2T12	0.335212	2
ARL5C	0.330815	2
KRTAP24-1	0.330804	2
POM121L2	0.330761	2
PLSCR5	0.329286	2
TCP11X2	0.328873	2
LCE6A	0.326219	2
C6orf163	0.326108	2
C16orf92	0.325079	2
C12orf76	0.323881	2
NUTM2F	0.32262	2
TMEM52	0.320852	2
ZNF852	0.3196	2
ZC2HC1B	0.317278	2
CDCP2	0.316868	2
SPACA5	0.315155	2
ZNF705D	0.314854	2
OR5AC2	0.309985	2
C21orf140	0.308805	2
PINLYP	0.307396	2
MSGN1	0.306877	2
ANKDD1B	0.305176	2
LYPD8	0.304488	2
LRRD1	0.304376	2
PPIAL4E	0.302665	2
TARM1	0.302562	2
OR4M1	0.302119	2
ZSCAN5B	0.301764	2
SLC35G6	0.300779	2
RBAK-RBAKDN	0.300029	2
C8orf88	0.299298	2
PNLIPRP3	0.299139	2
SEC14L6	0.298501	2
KRTAP4-9	0.297781	2
ARL13A	0.296641	2
OR9G9	0.294364	2
GDPD4	0.292892	2
C22orf42	0.288064	2
OR4M2	0.286244	2
FNDC7	0.286219	2
C2orf66	0.286143	2
UBTFL1	0.285625	2
LIPM	0.284521	2
OR5H2	0.282854	2
OR52E4	0.282781	2
MAGEB17	0.282775	2
KRTAP4-4	0.279964	2
TMEM251	0.279091	2
DYNAP	0.278225	2
SH2D7	0.277968	2
GAB4	0.277522	2
PRAMEF11	0.277155	2
ZNF836	0.274361	2
OR51S1	0.273104	2
OR4A16	0.272665	2
PRAMEF6	0.272495	2
GAGE12C	0.271661	2
GAGE12H	0.271661	2
TRIM48	0.270275	2
OR11G2	0.267282	2
C11orf40	0.265666	2
LIPJ	0.262322	2
GAGE12D	0.262243	2
LRRC69	0.261392	2
OR5AP2	0.261071	2
OR52A5	0.260912	2
OR51L1	0.260642	2
OCSTAMP	0.260622	2
OR8J3	0.259219	2
ZNF781	0.258503	2
PRAMEF18	0.2583	2
KRTAP19-3	0.256891	2
PHGR1	0.254574	2
ARL9	0.25318	2
TMEM72	0.252391	2
OR9G1	0.252019	2
OR11H1	0.249996	2
SPANXN5	0.249162	2
NPIPA7	0.248069	2
NPIPB4	0.247308	2
KRTAP9-6	0.246799	2
IGSF23	0.245801	2
FAM187A	0.24325	2
TRIM64B	0.242057	2
FAM170B	0.241971	2
OR8H2	0.239288	2
OR52N4	0.238537	2
ERICH2	0.238455	2
OR2G2	0.237738	2
OR2AK2	0.235967	2
SAA2-SAA4	0.232842	2
OR52H1	0.232751	2
OR51F2	0.231689	2
CLPSL2	0.231376	2
OR5T2	0.22612	2
OR10AG1	0.225937	2
OR4D11	0.225298	2
ASIC5	0.225219	2
ANKRD66	0.224337	2
TRIM49D1	0.223175	2
TEX38	0.22289	2
OR2A42	0.221954	2
OR6K2	0.221612	2
DEFB113	0.220605	2
SPANXN2	0.220289	2
OR4D5	0.219433	2
KRTAP19-6	0.218671	2
OR4N2	0.21844	2
OR4K15	0.217621	2
OR5M1	0.21649	2
FAM166B	0.216159	2
GJA10	0.215445	2
NXPE2	0.213115	2
C20orf202	0.212283	2
IQCF5	0.211382	2
OR52K2	0.208976	2
OR10G7	0.20831	2
OR51Q1	0.20828	2
KRTAP5-5	0.20778	2
OR10V1	0.207399	2
OR8H1	0.206814	2
TMEM81	0.206129	2
KRTAP5-11	0.204079	2
OR5H14	0.20304	2
OR10G8	0.202893	2
OR14C36	0.202674	2
TRIM64	0.202447	2
OR4K14	0.202097	2
OR4Q3	0.201013	2
OR1L6	0.199659	2
PLET1	0.199637	2
C12orf54	0.198812	2
OR5D16	0.197212	2
KRTAP5-7	0.197161	2
TRIM77	0.19409	2
OR6C65	0.193196	2
OR5D14	0.19308	2
OR6K3	0.187718	2
OR5T3	0.187108	2
SPANXN1	0.185545	2
OR14I1	0.182223	2
PRAMEF7	0.181807	2
KRTAP5-8	0.181565	2
OR5M9	0.180986	2
OR1L4	0.180916	2
ZNF705B	0.180091	2
OR4S1	0.179768	2
OR2V2	0.179344	2
OR8G5	0.176001	2
OR9I1	0.174617	2
KRTAP5-10	0.173085	2
OR5J2	0.172934	2
OR4C11	0.169997	2
ZNF705G	0.167708	2
KRTAP6-3	0.166795	2
OR4K2	0.166486	2
CXorf66	0.164278	2
OR7G1	0.162797	2
OR2T6	0.162137	2
OR8U8	0.160348	2
OR4B1	0.16019	2
SMIM2	0.160094	2
OR51A7	0.159888	2
OR13D1	0.159296	2
KRTAP9-9	0.157202	2
OR5AK2	0.15715	2
OR2G6	0.153119	2
OR4D9	0.152051	2
OR56A4	0.151876	2
OR2M2	0.150692	2
OR52N5	0.146708	2
TBC1D29	0.143383	2
OR4C3	0.143202	2
OR52N2	0.139612	2
OR13C9	0.136718	2
OR2T10	0.136525	2
OR4C46	0.136407	2
OR2T3	0.136393	2
OR56A1	0.133312	2
OR1S2	0.132027	2
OR4F3	0.131734	2
OR4F16	0.131734	2
OR4F29	0.131734	2
OR56B4	0.123915	2
OR7G2	0.122392	2
OR10H4	0.119203	2
IGFL4	0.110086	2
OR4C6	0.108957	2
OR10K2	0.101865	2
ANKRD33B	0.808982	3
ZNF805	0.796931	3
GLTPD2	0.723855	3
KIAA1211L	0.720245	3
ZNF736	0.698817	3
LINGO3	0.679293	3
FRMPD3	0.675934	3
LBX2	0.673688	3
TOR4A	0.670509	3
CTXN1	0.669614	3
ZNF99	0.661667	3
ERICH3	0.651809	3
ZNF780B	0.643183	3
FER1L5	0.637315	3
FAM181B	0.62984	3
ZNF697	0.621463	3
C20orf144	0.612038	3
TTC22	0.601073	3
ARHGEF33	0.598309	3
SIGLEC15	0.596167	3
FAM196A	0.590661	3
FAM229A	0.588777	3
SAMD5	0.588506	3
ZNF793	0.582159	3
ZFP14	0.581894	3
PPM1N	0.579491	3
LRRC71	0.575883	3
CNTD2	0.573932	3
TMEM229A	0.570311	3
MBLAC1	0.567017	3
TMEM64	0.563231	3
F8A2	0.557591	3
F8A3	0.557591	3
PGBD4	0.55662	3
C17orf97	0.554688	3
ANKRD30B	0.554204	3
SBK2	0.548781	3
FOXD4L5	0.548508	3
FAM110D	0.546492	3
SYDE2	0.544853	3
C19orf35	0.534761	3
NKX1-2	0.534238	3
CT47A11	0.533304	3
UAP1L1	0.532419	3
MYPOP	0.532227	3
ST20	0.522642	3
ANKRD31	0.519622	3
UBALD2	0.512081	3
IGSF22	0.511983	3
CCDC64B	0.510634	3
URGCP-MRPS24	0.509578	3
ZNF772	0.509335	3
FAM98C	0.503999	3
DCAF8L1	0.501786	3
SRRM5	0.498372	3
HSBP1L1	0.493492	3
DEFB130	0.492486	3
FOXI3	0.492132	3
ALKBH6	0.490526	3
DRGX	0.488897	3
ESPNL	0.487787	3
PMF1-BGLAP	0.485893	3
GPR137C	0.485419	3
C1QTNF8	0.482955	3
TRIM39-RPP21	0.476146	3
KRTAP2-1	0.476068	3
LRRC38	0.475869	3
ISY1-RAB43	0.474123	3
SH2D4B	0.473431	3
S100A7L2	0.471578	3
PTX4	0.469545	3
FAM72D	0.469431	3
TMEM136	0.461466	3
HSF5	0.461053	3
FAM174B	0.459355	3
C7orf57	0.458665	3
SPATS1	0.458392	3
PLEKHD1	0.458348	3
R3HDM4	0.452619	3
FAM72B	0.450813	3
C16orf91	0.449243	3
C16orf96	0.448871	3
RAD51AP2	0.448486	3
ASAH2B	0.446383	3
EXD1	0.44414	3
SLC26A10	0.444113	3
FXYD6-FXYD2	0.44404	3
ZNF493	0.443591	3
TMEM221	0.442121	3
TRNP1	0.441203	3
MFSD6L	0.438712	3
TVP23A	0.438505	3
BRICD5	0.437576	3
AARD	0.437332	3
SRGAP2B	0.436994	3
LRCOL1	0.436384	3
CT45A6	0.425537	3
TSPYL6	0.424221	3
SYCN	0.424171	3
IZUMO3	0.420801	3
NUTM2B	0.417456	3
FOXI2	0.416817	3
ZFP3	0.416178	3
POTEC	0.413371	3
AMN1	0.409188	3
VSIG10L	0.407104	3
XKR9	0.406586	3
TMEM198	0.404991	3
CXorf65	0.402866	3
CCDC144NL	0.401222	3
ZNF578	0.400441	3
PRR19	0.399959	3
SPATA31E1	0.399702	3
MEMO1	0.399619	3
PROCA1	0.399493	3
C17orf105	0.398977	3
OTOP3	0.397078	3
CCDC154	0.396655	3
SPATA31A1	0.396564	3
KRTAP10-12	0.395585	3
FADS6	0.39494	3
RFESD	0.394604	3
PLEKHG7	0.393004	3
ZNF823	0.392832	3
C8orf46	0.391913	3
STPG1	0.39173	3
TVP23C-CDRT4	0.391372	3
TMEM145	0.391131	3
C2orf76	0.390622	3
C14orf180	0.390227	3
TMEM144	0.387699	3
TRABD2A	0.38692	3
TSPY2	0.386471	3
PRR22	0.385029	3
C9orf153	0.384683	3
CCDC160	0.384553	3
CLRN2	0.384037	3
FAM159A	0.383766	3
TMPPE	0.383685	3
C9orf92	0.381593	3
LRRN4CL	0.381445	3
TMEM71	0.381169	3
TEPP	0.378845	3
C12orf40	0.378562	3
FAM169B	0.377443	3
RAB19	0.376444	3
CLEC2L	0.375006	3
PXT1	0.374817	3
KRTAP13-4	0.374512	3
SPATA31A3	0.373327	3
RNF103-CHMP3	0.372401	3
FABP9	0.371575	3
RTP5	0.370746	3
GLRA4	0.369795	3
PRSS54	0.369123	3
SVOPL	0.369059	3
SBK3	0.36901	3
DCAF8L2	0.368353	3
OR2T33	0.36681	3
TSPY4	0.366592	3
UBAP1L	0.365951	3
CTAGE6	0.365356	3
CCDC30	0.364166	3
RIPPLY3	0.363805	3
GAPT	0.363676	3
C7orf33	0.363633	3
ARRDC5	0.362268	3
CCER2	0.360609	3
C2orf54	0.35974	3
LRRC72	0.359243	3
PIRT	0.358228	3
SATL1	0.356615	3
KRTAP10-10	0.355625	3
CCDC79	0.354925	3
CARD17	0.352735	3
TP53TG3B	0.352051	3
DNAJC25	0.352018	3
OR1K1	0.351982	3
C3orf30	0.350719	3
CDRT15L2	0.34842	3
C12orf73	0.346848	3
KRTAP19-1	0.340452	3
KRTAP20-1	0.339164	3
TMEM125	0.336391	3
CLDND2	0.333361	3
LYRM9	0.333076	3
OR10A6	0.332914	3
LCN10	0.328572	3
CCDC125	0.328487	3
WDR88	0.326992	3
FAM166A	0.325786	3
TPRX1	0.324479	3
SERPINE3	0.323136	3
KRTAP22-1	0.323121	3
SLC15A5	0.321518	3
KRTAP2-2	0.320845	3
ZNF611	0.320621	3
C10orf128	0.320411	3
ANHX	0.32003	3
ZNF660	0.318376	3
LRRC73	0.317607	3
C14orf178	0.317323	3
OR51G2	0.316257	3
NEDD8-MDP1	0.315233	3
ZNF615	0.315161	3
SETSIP	0.315054	3
CCDC169	0.3131	3
ZNF547	0.311342	3
FAM187B	0.308475	3
ZNF728	0.308464	3
LCN12	0.308313	3
UPK3BL	0.303012	3
SPINK8	0.302277	3
HMSD	0.301962	3
FITM1	0.301353	3
SMIM21	0.300285	3
CPXCR1	0.299031	3
ZNF700	0.298482	3
FAM221B	0.295546	3
SPINT4	0.294964	3
PPIAL4G	0.294861	3
SLC35G3	0.294	3
C10orf120	0.29326	3
OR10S1	0.291083	3
ZNF844	0.291075	3
OR5A1	0.290607	3
LRIT2	0.290038	3
C3orf22	0.289681	3
OR2Y1	0.288987	3
RAB42	0.288214	3
ZIM3	0.286992	3
TMEM95	0.286643	3
FRG2C	0.286182	3
DEFB110	0.286052	3
GAGE12J	0.285772	3
OVCH2	0.285623	3
ZHX1-C8ORF76	0.284985	3
NBPF4	0.282728	3
OR1N1	0.28171	3
ANKUB1	0.280781	3
LIPN	0.280539	3
FRG2B	0.280359	3
KRTAP1-4	0.278911	3
TBC1D28	0.278465	3
SMIM18	0.277909	3
PP2D1	0.276597	3
SCGB2B2	0.274736	3
ZIK1	0.274727	3
LINGO4	0.272146	3
KRTAP20-2	0.26994	3
GAGE12E	0.26983	3
KRTAP21-1	0.269526	3
SPACA5B	0.269075	3
OR8J1	0.268819	3
OR8B12	0.268366	3
ZNF347	0.267642	3
OR13A1	0.266992	3
C17orf64	0.266358	3
KRTAP9-7	0.266249	3
TSPAN16	0.265831	3
C1orf185	0.265824	3
NPIPB5	0.265121	3
OR52L1	0.264977	3
MEI4	0.264419	3
ANTXRL	0.263543	3
DNAJC5G	0.262771	3
LCE1A	0.262512	3
OR1M1	0.262265	3
OR5M8	0.261395	3
PRAMEF17	0.26002	3
OR5R1	0.258864	3
PRSS38	0.258704	3
OR4N4	0.257676	3
PATE3	0.256535	3
FAM163B	0.255651	3
KRTAP6-1	0.254315	3
CCDC54	0.253668	3
FAHD2B	0.253016	3
NBPF6	0.251522	3
OR4K5	0.249423	3
OR1L3	0.249204	3
CT62	0.248336	3
OR6X1	0.247361	3
TEX13B	0.247179	3
SERINC4	0.246648	3
NPIPA5	0.245943	3
OR5M11	0.245455	3
ZNF354B	0.245078	3
KRTAP5-2	0.244835	3
OR6P1	0.243843	3
OR9K2	0.243529	3
ZNF665	0.241087	3
ZNF479	0.241068	3
OR2A25	0.240608	3
ZNF860	0.239075	3
OR11L1	0.238715	3
OR10AD1	0.23679	3
OR5AU1	0.234914	3
OR10H5	0.234279	3
SPHAR	0.233941	3
TMEM225	0.233099	3
OR5M10	0.23226	3
OR1I1	0.232205	3
C4orf45	0.231979	3
TMEM233	0.231546	3
OR5D13	0.229878	3
KRTAP7-1	0.229738	3
KRTAP4-3	0.228328	3
KRTAP9-1	0.227967	3
OR1L8	0.227734	3
OR52E8	0.226237	3
KRTAP5-1	0.224458	3
OR4A15	0.222355	3
OR9Q1	0.221564	3
OR6C74	0.221203	3
OR2A1	0.22108	3
ATP5L2	0.220715	3
OR51D1	0.220124	3
OR2B2	0.217595	3
PAGE2B	0.217217	3
OR6B3	0.216721	3
OR2A7	0.216564	3
ZNF474	0.215971	3
OR8D1	0.215365	3
TSPAN19	0.214385	3
OR4D2	0.213764	3
ZNF880	0.211644	3
CRIP3	0.209432	3
OR5K1	0.207605	3
TRIM51	0.206451	3
RNASE12	0.205847	3
OR8K3	0.204999	3
OR2AE1	0.20477	3
IQCF3	0.201921	3
FAM86B2	0.201633	3
DEFB116	0.200933	3
FAM25A	0.20082	3
C1orf162	0.200686	3
OR2G3	0.200365	3
SH2D6	0.196671	3
OR2AG2	0.196098	3
DEFB112	0.195394	3
OR2AT4	0.19468	3
PRAMEF8	0.194303	3
OR10A7	0.193761	3
REP15	0.193757	3
OR52E6	0.193709	3
OR2D3	0.193632	3
OR5W2	0.193506	3
OR5T1	0.193137	3
OR10K1	0.192227	3
ZNF284	0.189045	3
PLA2G2C	0.188685	3
FAM183A	0.188277	3
OR2A14	0.187008	3
OR5L2	0.186924	3
OR5M3	0.185241	3
OR2T1	0.183536	3
OR52I1	0.183151	3
OR2T35	0.182793	3
C9orf57	0.181078	3
OR5K2	0.180324	3
OR51B6	0.179618	3
OR52R1	0.17858	3
OR6C3	0.177659	3
OR6C2	0.177406	3
ADIG	0.177403	3
OR52B2	0.175598	3
OR8D4	0.174375	3
KRTAP5-6	0.173928	3
FNDC8	0.173358	3
OR6T1	0.17223	3
OR51V1	0.171788	3
OR6B2	0.170789	3
OR10R2	0.170303	3
HIGD1C	0.169079	3
OR9G4	0.168805	3
OR10G4	0.166577	3
OR5B12	0.16475	3
OR10W1	0.159982	3
OR7A10	0.157796	3
OR52I2	0.157024	3
OR5A2	0.154138	3
OR5D18	0.151351	3
OR8K1	0.15016	3
OR6K6	0.147034	3
SMIM6	0.145444	3
OR5P3	0.144916	3
OR8S1	0.139281	3
OR56B1	0.138889	3
OR13F1	0.136097	3
ZNF613	0.135549	3
WBSCR28	0.134035	3
OR6C70	0.132821	3
DEFB115	0.130776	3
OR4C13	0.129535	3
OR10T2	0.127889	3
OR2T5	0.12532	3
KRTAP19-4	0.124869	3
OR6Y1	0.121927	3
GPR33	0.118582	3
OR5B2	0.115145	3
OR1S1	0.109317	3
KCNG2	0.819232	4
PLEKHM3	0.798163	4
NKX6-2	0.787008	4
GK5	0.772682	4
BEND4	0.766957	4
VSTM2B	0.744423	4
C5orf38	0.735266	4
ITPRIPL2	0.728482	4
TRIM67	0.728088	4
SNED1	0.710278	4
ZNF865	0.692612	4
ELFN1	0.692116	4
RIMBP3C	0.691299	4
C8orf82	0.684674	4
PNMAL2	0.681169	4
SCRT2	0.676807	4
SRRM3	0.675288	4
ZKSCAN2	0.670321	4
C17orf51	0.669781	4
KIAA1210	0.663448	4
IER5L	0.658082	4
SEC14L5	0.633941	4
ABHD17C	0.628669	4
ZXDB	0.623844	4
SPDYE3	0.623005	4
ZNF862	0.620875	4
CXorf23	0.617958	4
POTEM	0.616954	4
C3orf70	0.615068	4
FOXD4L3	0.613393	4
DEFB114	0.608192	4
NKX2-4	0.607023	4
ZNF681	0.603706	4
ZSWIM4	0.602247	4
C7orf55-LUC7L2	0.602209	4
OOEP	0.600572	4
C9orf66	0.598882	4
DCAF12L1	0.597658	4
ZBTB39	0.594033	4
UBE2QL1	0.5938	4
ZNF653	0.585996	4
ZNF710	0.584875	4
C19orf45	0.578078	4
ZNF853	0.577049	4
CCER1	0.576756	4
FAM184B	0.574548	4
SLC25A53	0.574122	4
ACTL9	0.571837	4
C1QL2	0.570808	4
COMMD3-BMI1	0.566614	4
VWA5B1	0.566071	4
NKPD1	0.562382	4
C2CD4C	0.560687	4
MUC22	0.557011	4
C9orf47	0.5562	4
KIAA1644	0.555371	4
FAM43B	0.549504	4
RBM46	0.547886	4
PPP5D1	0.544601	4
SMIM4	0.541045	4
C6orf226	0.537753	4
SLC18B1	0.534137	4
SLC35E2	0.529099	4
SUSD5	0.52817	4
MROH2A	0.527515	4
WDR86	0.527514	4
FAM129C	0.527254	4
DUS1L	0.519966	4
ZNF721	0.519462	4
C1QL4	0.518069	4
ZNF319	0.516502	4
MAMDC4	0.516164	4
TMEM190	0.515875	4
SLC37A2	0.515138	4
CCDC157	0.514548	4
TMEM220	0.513751	4
GPR62	0.513165	4
GOLGA6L9	0.512631	4
LHFPL4	0.512341	4
GOLGA6L10	0.510674	4
2017-03-11	0.509946	4
ZNF843	0.506988	4
QRICH2	0.505449	4
ZNF575	0.502893	4
SPTSSB	0.497429	4
LRTM2	0.497299	4
BTNL9	0.497169	4
KLHDC7A	0.496102	4
ZNF709	0.494923	4
TMEM151A	0.494137	4
EFHB	0.493615	4
TLCD2	0.492739	4
RASA4B	0.492096	4
KIAA0895	0.491948	4
CCDC81	0.490198	4
KIAA1107	0.489598	4
ZFR2	0.486472	4
TMEM110-MUSTN1	0.486277	4
PTCHD3	0.485576	4
NHSL2	0.485444	4
NUDT17	0.484596	4
TSPAN11	0.483978	4
TTC36	0.483286	4
TVP23C	0.482472	4
RBM44	0.481408	4
TMEM44	0.480906	4
POU5F2	0.478256	4
SHISA7	0.47679	4
C11orf85	0.476371	4
KLHL30	0.475072	4
PRAC1	0.467169	4
RNF151	0.465744	4
IGFBPL1	0.465606	4
DEFB108B	0.46409	4
C16orf52	0.45993	4
LAMP5	0.458921	4
FAM69C	0.456968	4
ZNF80	0.455715	4
SPDYE2	0.454957	4
SLC35D3	0.453937	4
LNP1	0.453878	4
LRRC56	0.451252	4
FAM24B	0.450741	4
LYSMD2	0.449899	4
C15orf61	0.447355	4
IRGC	0.446855	4
ARHGEF37	0.446267	4
BEND6	0.445608	4
PERM1	0.445374	4
LCN8	0.445185	4
CYB5D1	0.443988	4
ZNF517	0.443943	4
ZNF718	0.44127	4
ZNF548	0.440341	4
CCDC150	0.440162	4
TCF24	0.439669	4
FAM186A	0.438596	4
TP53TG3C	0.437402	4
RAX2	0.436285	4
DEF8	0.435758	4
TTC16	0.434638	4
CCDC173	0.434288	4
LRP5L	0.434095	4
NANOGNB	0.433128	4
C9orf69	0.432551	4
DCAF12L2	0.431019	4
ZNF814	0.429625	4
ATP6AP1L	0.426827	4
SSX7	0.426457	4
GPR75-ASB3	0.425965	4
TRIQK	0.425964	4
C19orf73	0.425707	4
SPATC1	0.425496	4
TMEM218	0.425415	4
FAM83F	0.424314	4
POTEH	0.422068	4
C9orf173	0.42175	4
CNPY1	0.420227	4
ROPN1B	0.418895	4
DEFB125	0.418842	4
PRR20E	0.41786	4
FAM71F2	0.416912	4
CREG2	0.416156	4
GMNC	0.415517	4
GAS2L2	0.414913	4
LDLRAD1	0.414149	4
IZUMO2	0.413919	4
PTGES3L	0.412155	4
PRSS33	0.411508	4
SLC9B1	0.410882	4
ZNF682	0.408299	4
PIP5KL1	0.407853	4
ZMYM6NB	0.407848	4
CLEC18C	0.404721	4
MORN1	0.401813	4
ATP13A4	0.400695	4
MORN5	0.399892	4
ZNF441	0.399842	4
CTAGE8	0.398016	4
C6orf201	0.398002	4
TMEM61	0.397209	4
C11orf45	0.396709	4
KLHL33	0.396463	4
C17orf50	0.395792	4
CCNI2	0.39497	4
ZNF716	0.394381	4
ZNF253	0.393594	4
LIMS3L	0.391156	4
ZNF626	0.390171	4
ZMYND15	0.388695	4
C1orf56	0.387768	4
PFN4	0.387645	4
VWA3A	0.384523	4
S100Z	0.384503	4
POTEG	0.383935	4
SYNGR4	0.383561	4
ZNF486	0.377872	4
ZNF791	0.374786	4
RPEL1	0.372781	4
CT45A2	0.371889	4
KRT28	0.370798	4
OOSP2	0.369797	4
FAM196B	0.368225	4
FAM179A	0.368184	4
RFPL4B	0.366799	4
UNC93A	0.366776	4
ZNF527	0.362915	4
FBXO48	0.360541	4
CDRT15	0.360348	4
DQX1	0.358277	4
ZNF530	0.356811	4
C8orf22	0.355267	4
CIB3	0.354285	4
TGM7	0.35369	4
PGBD2	0.35256	4
MAB21L3	0.352173	4
GBP7	0.351182	4
SLC5A9	0.350376	4
PROX2	0.349129	4
SAMD15	0.349055	4
TP53TG3	0.346171	4
C5orf46	0.344933	4
XKRX	0.344726	4
KRTAP15-1	0.34319	4
TCTEX1D1	0.340775	4
ZNF726	0.340272	4
OR13C8	0.338639	4
ACPT	0.338467	4
IL17REL	0.336312	4
SPDYC	0.33625	4
CDHR4	0.333352	4
HHLA1	0.333168	4
C7orf62	0.332487	4
RNF222	0.332243	4
SLC6A16	0.329989	4
TMEM116	0.329337	4
ANKRD65	0.329244	4
AADACL2	0.328733	4
FBXO47	0.323983	4
KLRF2	0.323794	4
ZNF416	0.323766	4
CNBD2	0.32345	4
OR4K1	0.32322	4
C12orf74	0.321419	4
POTEB2	0.321373	4
RFX8	0.320905	4
C9orf152	0.318478	4
NCMAP	0.318413	4
ADAM20	0.316167	4
OR6B1	0.316107	4
ZNF813	0.315693	4
FAM151B	0.313885	4
ZNF765	0.313501	4
SEL1L2	0.312878	4
NXPE1	0.312424	4
GDPGP1	0.312281	4
OR52M1	0.310551	4
C15orf43	0.310122	4
KRTAP23-1	0.309924	4
OR2B11	0.308718	4
ZNF674	0.305837	4
C3orf67	0.304826	4
PRAMEF15	0.302863	4
PPP1R42	0.301863	4
TMEM89	0.301531	4
FRRS1	0.300296	4
MS4A10	0.299803	4
C2orf50	0.299414	4
C7orf72	0.296494	4
GPR75	0.296015	4
LCE1E	0.294496	4
PRAMEF1	0.291422	4
LCE2C	0.291397	4
C3orf36	0.29053	4
C12orf56	0.290192	4
LRRC36	0.289747	4
C17orf47	0.289473	4
C11orf42	0.287257	4
PDZD9	0.28684	4
SMLR1	0.286025	4
C10orf113	0.285704	4
WDR93	0.285591	4
ACSM4	0.285475	4
RESP18	0.285242	4
KNCN	0.28271	4
KRTAP4-5	0.28228	4
PLAC8L1	0.282234	4
ZNF619	0.281591	4
ZNF385C	0.280837	4
PRAMEF4	0.280804	4
GLOD5	0.279884	4
PPP1R36	0.279771	4
PRAMEF5	0.278897	4
KRTAP10-11	0.278811	4
UBQLNL	0.277124	4
GIMAP1-GIMAP5	0.276564	4
PATE4	0.276426	4
DHRS7C	0.276131	4
KRTAP19-7	0.274652	4
C2orf80	0.274437	4
TMIGD1	0.27438	4
PRSS53	0.273469	4
TMEM56-RWDD3	0.273019	4
TMEM239	0.272491	4
SAP25	0.27167	4
PABPN1L	0.271536	4
ZNF181	0.271029	4
RGS21	0.270889	4
NIPAL1	0.270744	4
SPATA25	0.270316	4
FAM170A	0.270141	4
PRAMEF2	0.269384	4
SPANXN4	0.268974	4
MS4A14	0.268424	4
DEPDC4	0.267329	4
SLC4A9	0.264663	4
ZNF845	0.263901	4
STEAP1B	0.263847	4
GAGE13	0.263539	4
GAGE6	0.262318	4
AWAT1	0.261711	4
PRAMEF9	0.260921	4
ZNF773	0.26078	4
CLDN25	0.260188	4
OR9A2	0.259753	4
NHLRC4	0.259683	4
ZNF799	0.259588	4
ODF3L1	0.257798	4
SLC22A24	0.256789	4
OR4S2	0.255218	4
PRR15L	0.253367	4
DNAJC22	0.253273	4
OR4E2	0.253054	4
OR10H1	0.252326	4
C1orf189	0.251481	4
C17orf99	0.250656	4
BTBD18	0.248856	4
ZNF587B	0.246782	4
METTL11B	0.246017	4
LCE1F	0.244583	4
APOC4-APOC2	0.243316	4
OR2A2	0.243308	4
C2orf73	0.242321	4
OR4D10	0.24094	4
SMIM9	0.239174	4
ZNF846	0.238952	4
OR4F17	0.238658	4
KRTAP10-2	0.238123	4
PRAMEF10	0.23808	4
OR10Z1	0.237935	4
DMRTC1B	0.237362	4
TMCO2	0.236859	4
TM4SF19	0.235726	4
CEACAM20	0.235253	4
ZNF749	0.234602	4
RERGL	0.229587	4
OR2D2	0.228043	4
KRTAP13-3	0.224706	4
LCN15	0.222922	4
ZNF565	0.221712	4
KRTAP13-1	0.221159	4
OR6M1	0.218695	4
ENTHD1	0.214142	4
TMCO5A	0.212762	4
C7orf61	0.211665	4
KRTAP13-2	0.210274	4
OR7G3	0.208524	4
SLC35F4	0.208441	4
OR2M3	0.208423	4
KRTAP9-8	0.208206	4
C1orf158	0.20818	4
FANCD2OS	0.208076	4
OR13J1	0.207634	4
OR2L8	0.206354	4
OR2T11	0.204756	4
MSMP	0.204678	4
TEX26	0.202779	4
OR6V1	0.199583	4
C12orf60	0.199063	4
OR4C16	0.197569	4
OR5H6	0.197117	4
OR1N2	0.195537	4
OR9A4	0.195165	4
SLC10A6	0.193651	4
KRTAP4-1	0.192576	4
OR13C3	0.191577	4
DEFB124	0.190616	4
OR4A5	0.188237	4
OR2C1	0.187929	4
OR8G1	0.186152	4
OR2T2	0.185846	4
OR52W1	0.185513	4
OR4C12	0.185505	4
LEUTX	0.183399	4
OR2L2	0.182099	4
OR52K1	0.181661	4
XAGE5	0.174439	4
ZNF816	0.169495	4
SCP2D1	0.166515	4
ZNF630	0.164847	4
ZNF782	0.162058	4
YIPF7	0.15985	4
OR5P2	0.15916	4
PRSS46	0.153527	4
OR8A1	0.153278	4
PRSS45	0.152546	4
OR2A5	0.149975	4
OR6F1	0.149101	4
OR6N1	0.14779	4
ZNF69	0.143202	4
OR13C2	0.142123	4
OR2M7	0.141389	4
IFI27L2	0.141177	4
OR51M1	0.140641	4
OR13C5	0.139597	4
OR4F15	0.137321	4
OR2Z1	0.13512	4
OR14J1	0.131424	4
OR8B2	0.129349	4
OR5AN1	0.125224	4
OR1J1	0.122223	4
OR2T34	0.112284	4
OR1J4	0.0711715	4
ZNF704	0.921699	5
C1QTNF4	0.871399	5
CLVS2	0.845798	5
IGFN1	0.81652	5
FAM227A	0.798512	5
ZNF771	0.798236	5
RBMXL3	0.796155	5
ZFHX2	0.788918	5
DENND5B	0.782326	5
HDGFL1	0.755249	5
ACRC	0.751764	5
FOXB1	0.732347	5
SLC45A4	0.72476	5
DMRTA2	0.719341	5
TCEB3C	0.716449	5
CASC10	0.70184	5
C19orf68	0.698797	5
OTP	0.697894	5
FAM173A	0.685807	5
RGPD4	0.685432	5
IGSF10	0.684675	5
PPDPF	0.68425	5
HMX3	0.683651	5
ZNF737	0.682765	5
CHIC1	0.678216	5
FAM150B	0.662022	5
ZNF628	0.661074	5
ZNF541	0.654937	5
SP5	0.654821	5
CCSAP	0.654326	5
EXOC3L4	0.648373	5
C17orf89	0.642664	5
GPR157	0.637375	5
KIAA1024	0.63477	5
SFT2D3	0.63404	5
ARPC4-TTLL3	0.626603	5
CNTNAP3B	0.624629	5
TOPAZ1	0.623425	5
ZBTB45	0.622064	5
ZNF275	0.620553	5
CCDC144A	0.617326	5
FOXD4L4	0.613703	5
ZNF777	0.608126	5
OGFOD3	0.606741	5
CATSPERG	0.604854	5
GPRIN3	0.604566	5
CCDC142	0.60229	5
FAM47B	0.599551	5
CCDC105	0.596683	5
TMEM203	0.596555	5
AMER3	0.58063	5
MFAP3L	0.580082	5
ZNF672	0.576562	5
HEPHL1	0.57375	5
ATP5J2-PTCD1	0.568052	5
GOLGA8O	0.56259	5
PLEKHA4	0.559628	5
C15orf38-AP3S2	0.559078	5
CCNJL	0.556342	5
TMEM121	0.553171	5
NUP210L	0.548116	5
MAGIX	0.545463	5
C1orf100	0.544688	5
ABHD15	0.544078	5
CENPBD1	0.544027	5
APITD1-CORT	0.542545	5
KIAA1755	0.540803	5
WSCD1	0.539089	5
ONECUT3	0.538443	5
FAM222A	0.537974	5
CNFN	0.536236	5
ZNF362	0.535585	5
NIM1K	0.533015	5
BARHL2	0.53181	5
CAPN12	0.531753	5
TMEM151B	0.531016	5
ZNF775	0.529326	5
ANKRD34A	0.528438	5
PABPC4L	0.524927	5
ANKRD24	0.524249	5
ZBTB8B	0.523874	5
GOLGA6L4	0.522656	5
KANSL1L	0.52186	5
ZNF605	0.517961	5
FAM200B	0.516678	5
RASL11A	0.516166	5
KBTBD3	0.514362	5
VPS9D1	0.513612	5
ANKRD42	0.512071	5
ECT2L	0.510106	5
C17orf104	0.509252	5
SHCBP1L	0.506623	5
RSPH10B	0.506563	5
MAP1LC3B2	0.50556	5
KIAA1614	0.504264	5
ZNF425	0.504222	5
C14orf28	0.502301	5
PSTK	0.500895	5
PPP1R27	0.499384	5
TMED7-TICAM2	0.49856	5
CLPSL1	0.496286	5
MROH5	0.495329	5
ZNF324B	0.491774	5
MROH6	0.491281	5
CATSPERD	0.491113	5
NFKBID	0.490033	5
KBTBD12	0.488894	5
PRR27	0.487632	5
TBC1D3C	0.486397	5
TBC1D3H	0.486112	5
FAM71B	0.485518	5
ZCCHC18	0.485401	5
BOD1L2	0.484245	5
PQLC1	0.483658	5
VWA5B2	0.483408	5
WDR64	0.47933	5
KLHDC7B	0.477374	5
PET117	0.477226	5
OTOP1	0.476819	5
LRRC37A3	0.474236	5
TBC1D3B	0.472869	5
FAM133A	0.471482	5
C8orf74	0.470758	5
FAM89A	0.469881	5
FAM218A	0.467894	5
ZNF492	0.46717	5
ARHGAP11B	0.466913	5
FAM150A	0.466489	5
ZNF585A	0.466488	5
OAF	0.46547	5
C2orf72	0.465423	5
ASNSD1	0.465304	5
NOTUM	0.464242	5
KHDC1	0.463141	5
FAM71E2	0.462608	5
ZNF669	0.461861	5
OXNAD1	0.461417	5
KRTAP19-5	0.46053	5
METTL10	0.45972	5
ERICH1	0.458851	5
MTRNR2L12	0.457472	5
C4orf48	0.45738	5
PPIL6	0.456078	5
NEURL3	0.454509	5
TMEM208	0.453449	5
C22orf46	0.453206	5
C15orf59	0.453104	5
SMIM20	0.452889	5
C1orf53	0.451564	5
ZNF599	0.451513	5
SAMD10	0.449686	5
ARID3C	0.449556	5
CMC1	0.44888	5
MOSPD3	0.447081	5
PSAPL1	0.446779	5
ANKRD37	0.446346	5
CALML4	0.444175	5
CHCHD5	0.443492	5
TTLL9	0.443485	5
CCDC17	0.442123	5
MROH2B	0.440021	5
ANKDD1A	0.437941	5
TMCO4	0.437286	5
TEC	0.436	5
CWH43	0.43574	5
CXorf67	0.435123	5
ADAL	0.434945	5
VSIG1	0.43396	5
FIBIN	0.433628	5
IQCJ-SCHIP1	0.432902	5
ZNF304	0.432067	5
SCML4	0.431261	5
MICALCL	0.430923	5
ZNF549	0.430664	5
CDKN2AIPNL	0.428561	5
FNDC9	0.428501	5
TCEAL6	0.426929	5
ANKRD45	0.426208	5
ZNF526	0.425895	5
TM2D2	0.425027	5
C1orf101	0.424892	5
LRRIQ4	0.424017	5
C7orf73	0.423405	5
TP53I13	0.418829	5
SS18L2	0.417533	5
GCSAML	0.41414	5
LRRC37A2	0.413891	5
CCDC73	0.41384	5
SMIM19	0.413604	5
SFT2D1	0.413409	5
NHLRC3	0.410792	5
ARL17A	0.41026	5
NRN1L	0.408456	5
RGL3	0.40761	5
TOMM20L	0.407556	5
RPS10-NUDT3	0.407375	5
SLC2A7	0.406552	5
SLC25A34	0.403862	5
KLRG2	0.403506	5
BSPH1	0.403015	5
DHRS12	0.402385	5
KRTAP2-3	0.400653	5
ZNF506	0.399643	5
OR7D2	0.399359	5
LRRC19	0.398974	5
TMEM196	0.397137	5
C2orf74	0.39298	5
GPR152	0.392668	5
PRSS36	0.392377	5
ARL17B	0.391748	5
CT83	0.391585	5
LRRC70	0.391137	5
MFSD3	0.390225	5
SERTM1	0.389912	5
ZNF675	0.389496	5
KRTAP17-1	0.389373	5
MFSD11	0.388007	5
C18orf32	0.386731	5
ZNF257	0.382699	5
C5orf34	0.382314	5
CRIPAK	0.380724	5
TPRG1	0.378236	5
ZYG11A	0.374373	5
ZNF543	0.373873	5
KRT222	0.373216	5
KRTAP16-1	0.372455	5
ANKRD33	0.37069	5
TCTE1	0.370497	5
TLCD1	0.36918	5
TCEAL5	0.36917	5
C2orf61	0.368936	5
ZBED2	0.368866	5
TMPRSS12	0.368672	5
TCTEX1D4	0.368088	5
GPR82	0.368014	5
MYADML2	0.366759	5
RBM43	0.366152	5
KRT39	0.365764	5
C19orf18	0.364927	5
ZBBX	0.363822	5
ZNF551	0.363701	5
CHURC1-FNTB	0.362148	5
RINL	0.361393	5
SLC38A11	0.361358	5
ZNF540	0.361069	5
R3HCC1	0.36074	5
ZIM2	0.360346	5
SYS1	0.359928	5
ZNF841	0.359557	5
CLEC18B	0.358766	5
TVP23B	0.358609	5
CTAGE9	0.358026	5
FAM228A	0.357638	5
MEIG1	0.35751	5
TRIM60	0.357156	5
CNTD1	0.355903	5
ZNF610	0.355047	5
NAALADL1	0.35442	5
FAM92B	0.352841	5
TMED6	0.352493	5
C8orf58	0.350353	5
PRODH2	0.350207	5
PATL2	0.350084	5
SLC22A10	0.349621	5
MAGEB10	0.349206	5
KRTAP10-6	0.346556	5
C8orf44	0.345537	5
CPSF4L	0.344823	5
CDPF1	0.3447	5
ZNF560	0.341346	5
CDKL4	0.338868	5
TCF23	0.338421	5
ZNF677	0.337945	5
DTWD1	0.33787	5
GALNT5	0.337056	5
CCT8L2	0.336893	5
C9orf131	0.33574	5
LCE1D	0.334454	5
CCDC89	0.333906	5
TMEM86B	0.333232	5
KRTAP12-4	0.332723	5
FAXDC2	0.331897	5
TTC39A	0.33079	5
KRTAP8-1	0.330612	5
ZNF429	0.330603	5
GLYATL1	0.330195	5
MAP6D1	0.330076	5
PPIAL4C	0.329104	5
ZCWPW2	0.328883	5
ZNF789	0.326923	5
C1orf127	0.325495	5
KAAG1	0.325434	5
H2BFM	0.325312	5
FAM221A	0.32492	5
DEFB123	0.324639	5
KCTD19	0.324002	5
VMAC	0.323486	5
VN1R2	0.323234	5
CBLN3	0.32315	5
C3orf18	0.322257	5
R3HDML	0.321902	5
ARHGEF35	0.321778	5
PRSS42	0.321473	5
SAGE1	0.32089	5
TRIM61	0.3208	5
LSMEM2	0.320114	5
TMEM219	0.320011	5
GRAMD2	0.317112	5
SMYD5	0.316825	5
ZNF30	0.315628	5
FAM181A	0.314332	5
GUCA1C	0.314189	5
C19orf54	0.313789	5
LRRC3C	0.313341	5
BPIFA3	0.313042	5
RUFY4	0.312627	5
KDM4E	0.310658	5
CNBD1	0.30905	5
ZNF528	0.306735	5
FAM216B	0.306661	5
TNFAIP8L3	0.304985	5
ZNF766	0.304873	5
OR2B6	0.304171	5
EIF4E1B	0.303975	5
BTNL3	0.30176	5
ZNF485	0.300417	5
IFIT1B	0.300238	5
SPINK13	0.298999	5
SAMD13	0.298404	5
IQCF2	0.297964	5
SYNDIG1L	0.297536	5
EFCAB3	0.297131	5
CALML6	0.297034	5
PRSS55	0.296632	5
KRTAP1-3	0.295806	5
OR1B1	0.294899	5
FAM86C1	0.294508	5
PATE2	0.293858	5
PEX11G	0.293729	5
FAM104B	0.293221	5
C2orf15	0.292785	5
TBC1D26	0.292113	5
ZCCHC5	0.29206	5
TMEM74B	0.291594	5
TEX33	0.28863	5
KCTD14	0.288229	5
LCE2B	0.287799	5
ZSWIM1	0.284634	5
ZNF676	0.284618	5
ZNF329	0.283531	5
TMEM69	0.283495	5
IGFL1	0.283442	5
STARD6	0.283269	5
SPAG11A	0.282861	5
ENTPD8	0.282345	5
DGAT2L6	0.282171	5
SMIM5	0.281354	5
FAM195B	0.280936	5
TMEM213	0.280712	5
SLC25A52	0.280464	5
ZFP37	0.279464	5
ZNF514	0.276377	5
KRTAP4-2	0.275629	5
CLEC17A	0.274007	5
ZNF134	0.273421	5
VGLL1	0.27265	5
TCHHL1	0.271315	5
LY6G5C	0.270834	5
PRY2	0.269824	5
C20orf196	0.268889	5
C10orf53	0.268402	5
ZNF570	0.267521	5
RIIAD1	0.266979	5
CEACAM4	0.265622	5
TMEM37	0.262115	5
ZNF790	0.261272	5
TIFAB	0.259596	5
C2orf57	0.259477	5
FAM86B1	0.259328	5
MOGAT1	0.258224	5
FAM178B	0.256621	5
LCE2D	0.255423	5
FAM185A	0.25514	5
MRGPRX4	0.254733	5
ZNF283	0.254693	5
KRBA2	0.254167	5
MBD3L2	0.253999	5
TRIM49C	0.25376	5
ZNF468	0.253593	5
SIGLECL1	0.252346	5
OR51B5	0.251404	5
MAGEC3	0.250325	5
SLC10A5	0.249504	5
TMEM252	0.248738	5
DMRTC1	0.245504	5
KRTAP4-8	0.24227	5
ZNF816-ZNF321P	0.23918	5
C1orf74	0.238082	5
ANKRD61	0.235841	5
OR10P1	0.235354	5
ZNF454	0.234156	5
MAGEB16	0.231955	5
OR6C4	0.230545	5
OR8B4	0.229758	5
IGFL2	0.22745	5
TMEM234	0.227233	5
EQTN	0.224523	5
OR8B8	0.218864	5
ZNF256	0.217502	5
ADPRM	0.217201	5
CD200R1L	0.216492	5
TXNDC8	0.214483	5
FABP12	0.213267	5
LCE1C	0.212329	5
ZNF285	0.211562	5
ACOT6	0.211175	5
KRTAP1-5	0.20995	5
ZNF713	0.20947	5
OR10H2	0.208294	5
LY6G6F	0.207652	5
ZNF583	0.20736	5
OR6Q1	0.205698	5
OR52D1	0.202054	5
OR1D5	0.199034	5
OR51F1	0.197465	5
KRTAP3-1	0.196952	5
OR4D1	0.195	5
OR5I1	0.194914	5
OR4F6	0.194576	5
ZNF808	0.19434	5
C11orf21	0.19314	5
KRTAP9-4	0.192187	5
OR4X1	0.190161	5
ZNF600	0.185887	5
OR4A47	0.184708	5
OR2A12	0.181991	5
FAM167B	0.18143	5
SEBOX	0.180666	5
WFDC6	0.180627	5
OR5L1	0.176432	5
RNASE10	0.17541	5
WFDC13	0.17489	5
OR6C1	0.17216	5
OR2M4	0.171736	5
ZNF383	0.171363	5
RNASE8	0.17055	5
OR10G2	0.167244	5
TMEM211	0.165609	5
OR1Q1	0.163098	5
OR4X2	0.158628	5
OR10G3	0.15557	5
OR51G1	0.149238	5
OR51I2	0.145407	5
OR51I1	0.144775	5
OR10A4	0.141958	5
OR8I2	0.141151	5
OR10X1	0.133242	5
PYDC2	0.131644	5
C20orf141	0.129914	5
OR51B4	0.127873	5
OR5AR1	0.122306	5
DEFB131	0.112077	5
PKHD1L1	0.89242	6
PLEKHG4B	0.858079	6
NKX1-1	0.837485	6
ZC3H6	0.828457	6
ISLR2	0.8225	6
GSC2	0.795924	6
KBTBD11	0.770407	6
TMEM178B	0.76384	6
EML6	0.738719	6
HOXC12	0.733382	6
HMX2	0.730564	6
VWC2	0.716233	6
IFFO2	0.714938	6
SKIDA1	0.710709	6
PRDM13	0.70412	6
LHX5	0.700959	6
GPR150	0.693857	6
GSX1	0.692617	6
OTOGL	0.690893	6
NEURL1B	0.690114	6
KIAA1147	0.686054	6
OTUD6A	0.679123	6
ATP10B	0.677697	6
NWD1	0.676308	6
GRID2IP	0.673908	6
C11orf87	0.660037	6
ZNF208	0.659767	6
YJEFN3	0.654065	6
FAM47A	0.650174	6
CCDC140	0.650117	6
PRDM11	0.644358	6
IGSF9B	0.641877	6
KLHL35	0.640492	6
SLC35E2B	0.638133	6
ZNF546	0.637932	6
FSBP	0.629341	6
DCDC2C	0.624909	6
DCAF4L1	0.622282	6
DACT3	0.61951	6
FJX1	0.618488	6
RGAG4	0.613722	6
ASB18	0.61033	6
B3GNT9	0.608665	6
ALPK2	0.603883	6
MBLAC2	0.600229	6
TMEM178A	0.599229	6
CHST13	0.598856	6
RNF44	0.598713	6
CELF5	0.593428	6
SH3RF3	0.592073	6
SH3TC1	0.588866	6
ADGB	0.585205	6
HS3ST6	0.582103	6
HDX	0.577612	6
MAP10	0.575753	6
CCDC96	0.57401	6
FAM65C	0.573012	6
PXDC1	0.571996	6
PPP1R3E	0.571523	6
VCX2	0.571309	6
RBP7	0.571297	6
ZNF621	0.569163	6
TTC9B	0.566376	6
HSD11B1L	0.564625	6
GPR25	0.562419	6
INSM2	0.561203	6
ZNF497	0.56017	6
SMIM12	0.559723	6
TMPRSS9	0.559408	6
OGFRL1	0.558287	6
VSIG10	0.556333	6
KCNF1	0.555562	6
NAT16	0.555305	6
SSC5D	0.551265	6
MYO1H	0.550032	6
GOLGA6B	0.548165	6
C19orf24	0.541453	6
GALNTL6	0.533548	6
FGFBP3	0.533083	6
KCNH4	0.530853	6
MCIDAS	0.529983	6
DAPL1	0.529811	6
TMEM132C	0.528524	6
SLC5A12	0.527681	6
TIGD3	0.527002	6
CARNS1	0.526984	6
TMEM236	0.526131	6
PCDHGA10	0.52579	6
DCAF4L2	0.525455	6
TPRG1L	0.524767	6
ZNF519	0.521833	6
L3HYPDH	0.521718	6
IGDCC3	0.521413	6
NYAP1	0.521229	6
ADPRHL1	0.518174	6
CXorf58	0.517015	6
NKX6-3	0.51696	6
PIWIL3	0.516952	6
ANKEF1	0.516776	6
MICU3	0.516542	6
RBMY1E	0.513607	6
C9orf50	0.512744	6
RBMY1D	0.511953	6
ZBTB47	0.511647	6
ABHD16B	0.510191	6
ANKRD53	0.509585	6
BSX	0.509276	6
EFCC1	0.508681	6
B3GNT7	0.506579	6
CXorf38	0.505745	6
FAM160B1	0.505218	6
FAM81A	0.502116	6
SH2D5	0.501019	6
LYPD2	0.501007	6
C15orf52	0.499924	6
GALNT8	0.497182	6
SLC35F5	0.497031	6
2017-09-14	0.496655	6
SRL	0.496067	6
GPR176	0.494583	6
FAM162B	0.49391	6
CCDC171	0.491866	6
C2orf69	0.491696	6
EFCAB13	0.491381	6
RBBP8NL	0.48974	6
METTL22	0.488952	6
ZFP41	0.488342	6
ASPHD1	0.486751	6
SLC22A15	0.484507	6
SLC35F3	0.483881	6
ZNF784	0.482028	6
LRRC4B	0.481923	6
TTC21A	0.481903	6
CCDC63	0.477452	6
KIAA1586	0.477026	6
TMEM179B	0.476374	6
KRBA1	0.47613	6
ADAD2	0.475023	6
TMEM59L	0.474937	6
PAPOLB	0.474808	6
ARL10	0.474556	6
HPDL	0.468785	6
DNAJC25-GNG10	0.466563	6
PRELID2	0.464868	6
CCDC74B	0.46461	6
SLC16A13	0.462758	6
LMBRD2	0.462046	6
ZNF662	0.461758	6
KLHDC8A	0.4593	6
C17orf67	0.45687	6
ZNF701	0.455463	6
BEND2	0.454088	6
LYPD4	0.450673	6
FAM156B	0.450638	6
[truncated: 16,621 more rows]
