# Supplementary material for: Defining Essentiality Score of Protein-Coding Genes and Long Noncoding RNAs
Source: Front Genet. 2018 Oct 9;9:380. doi: 10.3389/fgene.2018.00380 (PMC6189311; doi:10.3389/fgene.2018.00380)
Supplement: FILE S6 — GIC score and its difference of homologous genes between human and mouse. [file Table_6.XLSX]

## Sheet: Sheet1
Supplementary File6. GIC score and its difference of homologous genes between human and mouse.
human_gene	mouse_gene	human_geneID	mouse_geneID	human_gic	mouse_gic	gic_diff	rank_diff
DOK6	Dok6	220164	623279	0.746239	0.22891	0.517329	-0.86266
MCTS1	Mcts1	28985	68995	0.703596	0.251559	0.452037	-0.815014
GPR161	Gpr161	23432	240888	0.673297	0.237003	0.436294	-0.805956
UBL5	Gm16381	59286	100042786	0.753044	0.290299	0.462745	-0.798015
PAX5	Pax5	5079	18507	0.718193	0.296404	0.421789	-0.773171
PLCXD3	Plcxd3	345557	239318	0.646805	0.249687	0.397118	-0.76659
FRMPD3	Frmpd3	84443	245643	0.675934	0.275201	0.400733	-0.765559
SLC16A7	Slc16a7	9194	20503	0.866232	0.336937	0.529295	-0.757801
DEFB135	Defb30	613209	73670	0.67016	0.282054	0.388106	-0.753733
CALML5	Calm5	51806	494124	0.587535	0.180818	0.406717	-0.752758
RAB30	Rab30	27314	75985	0.778387	0.331651	0.446736	-0.746791
HBZ	Hba-x	3050	15126	0.679619	0.296536	0.383083	-0.744139
CD59	Cd59b	966	333883	0.631855	0.254409	0.377446	-0.743082
PRLH	Prlh	51052	623503	0.62506	0.248577	0.376483	-0.742404
TFF1	Tff1	7031	21784	0.698334	0.309079	0.389256	-0.739927
DNASE1L2	Dnase1l2	1775	66705	0.63351	0.266364	0.367146	-0.73228
TRIM13	Trim13	10206	66597	0.631165	0.276473	0.354692	-0.717888
APOL6	Apol6	80830	71939	0.784639	0.35031	0.434328	-0.716935
LRPAP1	Lrpap1	4043	16976	0.826168	0.358897	0.467272	-0.710977
VGLL3	Vgll3	389136	73569	0.809989	0.358304	0.451685	-0.707672
CD59	Cd59a	966	12509	0.631855	0.294331	0.337524	-0.69751
MRPL41	Mrpl41	64975	107733	0.719603	0.346763	0.37284	-0.694655
OPRM1	Oprm1	4988	18390	0.629235	0.296445	0.33279	-0.692157
ZNF780B	Zfp607	163131	545938	0.643183	0.30813	0.335053	-0.691053
IYD	Iyd	389434	70337	0.60151	0.269845	0.331665	-0.687226
SLCO1A2	Slco1a5	6579	108096	0.64333	0.311938	0.331392	-0.684975
ARNTL2	Arntl2	56938	272322	0.631938	0.308734	0.323204	-0.676853
SLC24A4	Slc24a4	123041	238384	0.757909	0.366919	0.39099	-0.673484
SGCD	Sgcd	6444	24052	0.579111	0.255043	0.324068	-0.66866
PCDHB5	Pcdhb6	26167	93877	0.656083	0.332168	0.323915	-0.668424
SYCE1L	Syce1l	100130958	668110	0.699034	0.35292	0.346113	-0.668254
SLC9A7	Slc9a7	84679	236727	0.78578	0.375309	0.410471	-0.666371
REL	Rel	5966	19696	0.666084	0.339572	0.326512	-0.666174
C1orf100	1700016C15Rik	200159	69428	0.544688	0.197629	0.347059	-0.661923
CREB5	Creb5	9586	231991	0.68795	0.352122	0.335828	-0.661558
ITGB8	Itgb8	3696	320910	0.73861	0.369584	0.369026	-0.660439
ZNF780B	1700049G17Rik	163131	73430	0.643183	0.331087	0.312096	-0.655204
MRGPRG	Mrgprg	386746	381974	0.600706	0.300146	0.30056	-0.650835
SLC6A20	Slc6a20a	54716	102680	0.584451	0.28194	0.302512	-0.64696
CALML5	Calm4	51806	80796	0.587535	0.287784	0.299751	-0.644326
CLVS2	Clvs2	134829	215890	0.845798	0.395867	0.449931	-0.639813
DSG1	Dsg1c	1828	211924	0.595033	0.304475	0.290558	-0.635416
MAVS	Mavs	57506	228607	0.799678	0.394827	0.404851	-0.632015
CTNNA3	Ctnna3	29119	216033	0.805274	0.395956	0.409317	-0.630758
RHOXF1	Rhox4b	158800	57737	0.549506	0.241347	0.308159	-0.629091
A1CF	A1cf	29974	69865	0.783911	0.394546	0.389365	-0.628072
PCDHB5	Pcdhb8	26167	93879	0.656083	0.35612	0.299962	-0.627418
CNTNAP5	Cntnap5a	129684	636808	0.618776	0.330829	0.287947	-0.626125
RHOXF1	Rhox4d	158800	664610	0.549506	0.245546	0.30396	-0.624671
SLCO1A2	Slco1a1	6579	28248	0.64333	0.349226	0.294104	-0.624473
TFEC	Tfec	22797	21426	0.566343	0.273489	0.292854	-0.62432
COX19	Cox19	90639	68033	0.589588	0.308142	0.281446	-0.621324
SLCO1A2	Slco1a4	6579	28250	0.64333	0.351803	0.291527	-0.619513
URAD	Urad	646625	231903	0.689044	0.374201	0.314842	-0.617748
RGS5	Rgs5	8490	19737	0.543689	0.241897	0.301793	-0.616057
PIK3R3	1700042G07Rik	8503	67323	0.573546	0.292675	0.280871	-0.615524
SHC3	Shc3	53358	20418	0.809833	0.404151	0.405682	-0.614309
MR1	Mr1	3140	15064	0.577209	0.298956	0.278253	-0.613817
SAR1B	Sar1b	51128	66397	0.620578	0.343326	0.277252	-0.608293
MACC1	Macc1	346389	238455	0.709711	0.387061	0.322649	-0.608218
SLC9A3	Slc9a3	6550	105243	0.691365	0.38004	0.311325	-0.607401
AP1M1	Ap1m1	8907	11767	0.538027	0.239487	0.298539	-0.606693
TRDMT1	Trdmt1	1787	13434	0.660476	0.368697	0.291779	-0.603826
HAGH	Hagh	3029	14651	0.60291	0.332137	0.270773	-0.60354
TSPAN10	Tspan10	83882	208634	0.552623	0.270482	0.282141	-0.602065
PTPN4	Ptpn4	5775	19258	0.84028	0.413735	0.426545	-0.600959
SLC25A53	Slc25a53	401612	67062	0.574122	0.306472	0.26765	-0.597827
EMP3	Emp3	2014	13732	0.574899	0.30777	0.267129	-0.597185
NEBL	Nebl	10529	74103	0.742356	0.401833	0.340523	-0.597111
SERPINB9	Serpinb9b	5272	20706	0.554115	0.279199	0.274916	-0.596374
KIAA1456	6430573F11Rik	57604	319582	0.760499	0.406053	0.354446	-0.596165
CD209	Cd209b	30835	69165	0.548624	0.270361	0.278262	-0.594406
LDOC1	Ldoc1	23641	434784	0.628533	0.35743	0.271103	-0.592555
MRPL51	Mrpl51	51258	66493	0.683757	0.386548	0.297209	-0.589649
HBQ1	Hbq1a	3049	216635	0.687962	0.388488	0.299473	-0.588734
CLEC2D	Clec2h	29121	94071	0.529549	0.242851	0.286698	-0.585325
TRIM38	Trim38	10475	214158	0.543081	0.26856	0.274521	-0.584718
GBP4	Gbp8	115361	76074	0.578958	0.320722	0.258236	-0.583529
RHOXF1	Rhox4c	158800	434759	0.549506	0.282453	0.267053	-0.583126
RPL27A	Rpl27a	6157	26451	0.609745	0.350467	0.259278	-0.581499
DSG1	Dsg1b	1828	225256	0.595033	0.338479	0.256554	-0.581446
IDH3G	Idh3g	3421	15929	0.587792	0.331167	0.256625	-0.581262
CLEC2D	Clec2d	29121	93694	0.529549	0.248674	0.280876	-0.578892
CALY	Caly	50632	68566	0.58982	0.335856	0.253964	-0.578825
IFT27	Ift27	11020	67042	0.541402	0.271921	0.269481	-0.576433
SERPINB9	Serpinb9d	5272	20726	0.554115	0.296238	0.257876	-0.57624
UQCRB	Uqcrb	7381	67530	0.540341	0.270903	0.269438	-0.575724
CES2	Ces2c	8824	234671	0.555216	0.298331	0.256885	-0.575027
GNRHR	Gnrhr	2798	14715	0.511482	0.21142	0.300062	-0.572184
CES2	Ces2h	8824	436059	0.555216	0.300558	0.254658	-0.572178
VMO1	Vmo1	284013	327956	0.696709	0.400178	0.296531	-0.571975
SLC6A4	Slc6a4	6532	15567	0.633542	0.370114	0.263429	-0.571457
FBXW2	Fbxw2	26190	30050	0.730668	0.410987	0.319681	-0.571223
RRP15	Rrp15	51018	67223	0.713781	0.406719	0.307061	-0.570657
SNX2	Snx2	6643	67804	0.63541	0.372135	0.263275	-0.570182
TNFRSF17	Tnfrsf17	608	21935	0.548619	0.291555	0.257064	-0.569995
ZFP14	Zfp14	57677	243906	0.581894	0.333651	0.248243	-0.56877
ZNF99	Zfp11	7652	22648	0.661667	0.387609	0.274058	-0.567384
ACTL9	Actl9	284382	69481	0.571837	0.324621	0.247216	-0.565652
BUD31	Bud31	8896	231889	0.568043	0.321152	0.246891	-0.563132
CLEC2D	Clec2e	29121	232409	0.529549	0.264457	0.265092	-0.561507
ZNF750	Zfp750	79755	319530	0.618289	0.365788	0.252501	-0.561318
GTF2H5	Gtf2h5	404672	66467	0.654482	0.387434	0.267048	-0.561081
PTAR1	Ptar1	375743	72351	0.81792	0.428336	0.389584	-0.560651
MKLN1	Mkln1	4289	27418	0.830465	0.430411	0.400054	-0.559988
RHOXF1	Rhox4a	158800	664609	0.549506	0.301477	0.248029	-0.559357
IPCEF1	Ipcef1	26034	320495	0.606712	0.360819	0.245893	-0.557967
TM4SF5	Tm4sf5	9032	75604	0.58622	0.344788	0.241433	-0.556947
BLK	Blk	640	12143	0.538832	0.289044	0.249788	-0.552379
HBQ1	Hbq1b	3049	544763	0.687962	0.407043	0.280919	-0.550675
TRMT5	Trmt5	57570	76357	0.57969	0.343599	0.236091	-0.548931
SLC6A19	Slc6a19	340024	74338	0.535066	0.288116	0.24695	-0.546135
TUBB2B	Tubb2b	347733	73710	0.584185	0.349339	0.234845	-0.54489
SLC44A1	Slc44a1	23446	100434	0.798382	0.434118	0.364264	-0.544376
MAMLD1	Mamld1	10046	333639	0.509452	0.235591	0.273861	-0.54385
SBK2	Sbk2	646643	381836	0.548781	0.312129	0.236653	-0.540707
GBP4	Gbp10	115361	626578	0.578958	0.347556	0.231402	-0.540461
PCDHB5	Pcdhb10	26167	93881	0.656083	0.399137	0.256946	-0.54025
RPL39	Rpl39l	6170	68172	0.515083	0.252704	0.262379	-0.538794
ZBTB46	Zbtb46	140685	72147	0.623731	0.38029	0.243441	-0.538759
ENTPD1	Entpd1	953	12495	0.826551	0.439161	0.38739	-0.53822
ZNF24	Zfp191	7572	59057	0.60087	0.366353	0.234518	-0.537458
SC5D	Sc5d	6309	235293	0.623287	0.381229	0.242058	-0.536418
SHROOM4	Shroom4	57477	208431	0.693442	0.416037	0.277405	-0.535584
XPO4	Xpo4	64328	57258	0.779731	0.435579	0.344152	-0.535204
TRAM2	Tram2	9697	170829	0.649577	0.399574	0.250003	-0.532301
RHOXF1	Rhox3h	158800	434758	0.549506	0.319848	0.229658	-0.530186
ORAI2	Orai2	80228	269717	0.767897	0.437309	0.330587	-0.526267
SREK1IP1	Srek1ip1	285672	67288	0.64482	0.399751	0.245069	-0.526155
TRAPPC5	Trappc5	126003	66682	0.693373	0.419899	0.273474	-0.526042
GK5	Gk5	256356	235533	0.772682	0.438223	0.33446	-0.525827
MYLK3	Mylk3	91807	213435	0.607538	0.376922	0.230616	-0.525341
RHOXF1	Rhox3g	158800	546294	0.549506	0.323069	0.226437	-0.524981
UBC	Ubc	7316	22190	0.607965	0.377419	0.230547	-0.524784
ARHGAP5	Arhgap5	394	11855	0.774362	0.438958	0.335403	-0.524454
KCNT2	Kcnt2	343450	240776	0.651749	0.404076	0.247673	-0.523831
DPP7	Dpp7	29952	83768	0.619835	0.386129	0.233707	-0.522431
PCDHB4	Pcdhb9	56131	93880	0.643505	0.400856	0.242648	-0.521865
CDH19	Cdh19	28513	227485	0.591626	0.367538	0.224088	-0.521337
C11orf94	1700029I15Rik	143678	75641	0.540096	0.313052	0.227045	-0.520338
DUSP21	Dusp21	63904	73547	0.521475	0.283584	0.237891	-0.519968
GATAD2B	Gatad2b	57459	229542	0.681192	0.41855	0.262642	-0.519403
APOOL	Apool	139322	68117	0.5306	0.302634	0.227967	-0.51795
FN3K	Fn3k	64122	63828	0.613442	0.384895	0.228547	-0.517213
HSPB6	Hspb6	126393	243912	0.709349	0.429219	0.28013	-0.515041
ECH1	Ech1	1891	51798	0.496047	0.228447	0.267599	-0.514967
RPS7	Rps7	6201	20115	0.583228	0.363958	0.21927	-0.514601
ORM1	Orm3	5004	18407	0.488068	0.208268	0.2798	-0.513797
SPRY3	Spry3	10251	236576	0.735988	0.437526	0.298462	-0.513177
CA5B	Car5b	11238	56078	0.561532	0.345346	0.216186	-0.512934
DCUN1D5	Dcun1d5	84259	76863	0.889937	0.453763	0.436174	-0.512327
SPTLC2	Sptlc2	9517	20773	0.689799	0.424318	0.265482	-0.512292
BCAP29	Bcap29	55973	12033	0.566672	0.350579	0.216093	-0.512256
PTCD3	Ptcd3	55037	69956	0.60504	0.383036	0.222004	-0.509828
ZNF605	Zfp605	100289635	675812	0.517961	0.28611	0.231851	-0.507914
INPP5E	Inpp5e	56623	64436	0.658919	0.414881	0.244038	-0.507878
CES2	Ces2b	8824	234669	0.555216	0.341792	0.213424	-0.507699
DUSP23	Dusp23	54935	68440	0.680956	0.423455	0.2575	-0.507603
CYP2D6	Cyp2d40	1565	71754	0.561863	0.34841	0.213453	-0.507564
RHOXF1	Rhox3f	158800	621852	0.549506	0.334882	0.214624	-0.507498
HBA2	Hba-a1	3040	15122	0.557491	0.34478	0.212711	-0.506622
ORM1	Orm2	5004	18406	0.488068	0.215905	0.272163	-0.505989
KLF7	Klf7	8609	93691	0.752567	0.443374	0.309193	-0.50546
LCN9	Lcn9	392399	77704	0.50991	0.271796	0.238113	-0.504945
ALPP	Alpi	250	76768	0.546261	0.331899	0.214362	-0.504668
ZNF780B	C030039L03Rik	163131	112415	0.643183	0.408964	0.234219	-0.503654
HIST1H2BJ	Hist1h2br	8970	665622	0.66325	0.419111	0.244139	-0.502344
CNDP2	Cndp2	55748	66054	0.56825	0.357939	0.210311	-0.501674
MAD1L1	Mad1l1	8379	17120	0.642534	0.409619	0.232915	-0.501446
GBP4	Gbp6	115361	100702	0.578958	0.366921	0.212037	-0.501371
PEX5L	Pex5l	51555	58869	0.755795	0.445589	0.310205	-0.501286
ZNF780B	Zfp780b	163131	338354	0.643183	0.410183	0.233	-0.50061
RBP7	Rbp7	116362	63954	0.571297	0.361149	0.210148	-0.500401
RHOXF1	Rhox4f	158800	636177	0.549506	0.339347	0.210159	-0.499788
C19orf24	1600002K03Rik	55009	69770	0.541453	0.327721	0.213731	-0.499778
ORC4	Orc4	5000	26428	0.580776	0.36973	0.211046	-0.498893
OPA3	Opa3	80207	403187	0.574714	0.365061	0.209653	-0.497911
CD84	Cd84	8832	12523	0.626494	0.403994	0.2225	-0.495325
SCGB3A1	Scgb3a1	92304	68662	0.486146	0.22194	0.264207	-0.495325
VAMP4	Vamp4	8674	53330	0.537308	0.326801	0.210506	-0.493792
BACE2	Bace2	25825	56175	0.766371	0.451548	0.314823	-0.490491
KBTBD3	Kbtbd3	143879	69149	0.514362	0.294321	0.220041	-0.489625
SMIM12	Smim12	113444	80284	0.559723	0.356555	0.203168	-0.489252
PDPR	Pdpr	55066	319518	0.718722	0.44333	0.275391	-0.488362
NDUFA8	Ndufa8	4702	68375	0.532208	0.323278	0.20893	-0.488343
TLR6	Tlr6	10333	21899	0.537354	0.330339	0.207015	-0.488296
ORM1	Orm1	5004	18405	0.488068	0.235193	0.252876	-0.487377
PDK3	Pdk3	5165	236900	0.685676	0.434193	0.251483	-0.487004
SERPINB9	Serpinb9	5272	20723	0.554115	0.351935	0.202179	-0.486813
GEN1	Gen1	348654	209334	0.555227	0.353098	0.202129	-0.486245
CXorf23	A830080D01Rik	256643	382252	0.617958	0.403614	0.214344	-0.484443
HDAC2	Hdac2	3066	15182	0.623113	0.408401	0.214712	-0.481111
LYRM7	Lyrm7	90624	75530	0.56877	0.368229	0.20054	-0.480857
PCDHB2	Pcdhb2	56133	93873	0.690199	0.438109	0.252091	-0.480389
HIST1H2BC	Hist1h2br	8347	665622	0.642013	0.419111	0.222902	-0.47982
CD47	Cd47	961	16423	0.585948	0.383384	0.202565	-0.478919
GRID2	Grid2	2895	14804	0.634863	0.416565	0.218299	-0.478158
HDX	Hdx	139324	245596	0.577612	0.376967	0.200645	-0.477987
CNTNAP3B	Cntnap3	728577	238680	0.624629	0.410636	0.213993	-0.477744
LRRC30	Lrrc30	339291	240131	0.541143	0.34262	0.198523	-0.476574
LRRC27	Lrrc27	80313	76612	0.556622	0.359962	0.19666	-0.475862
FAM127A	Cxx1a	8933	66158	0.64436	0.422109	0.222251	-0.475741
DEPDC1	Depdc1a	55635	76131	0.583344	0.38437	0.198974	-0.473855
PRELID2	Prelid2	153768	77619	0.464868	0.182896	0.281973	-0.47377
EVI5L	Evi5l	115704	213027	0.736005	0.453835	0.28217	-0.473353
NDE1	Nde1	54820	67203	0.585552	0.386354	0.199198	-0.472937
USP46	Usp46	64854	69727	0.663907	0.431948	0.231959	-0.472919
AK8	Ak8	158067	68870	0.55519	0.360906	0.194284	-0.471011
C5orf52	4921536K21Rik	100190949	67430	0.682436	0.439711	0.242725	-0.470231
DUSP19	Dusp19	142679	68082	0.513901	0.307883	0.206018	-0.468961
ZFYVE9	Zfyve9	9372	230597	0.501973	0.285377	0.216596	-0.468784
PAIP2B	Paip2b	400961	232164	0.568099	0.373866	0.194232	-0.468216
INPP5K	Inpp5k	51763	19062	0.546538	0.353636	0.192903	-0.46814
PVALB	Pvalb	5816	19293	0.597214	0.398265	0.198949	-0.467876
MTPAP	Mtpap	55149	67440	0.547402	0.355263	0.192138	-0.467622
METRNL	Metrnl	284207	210029	0.647678	0.427517	0.220161	-0.466388
VAPA	Vapa	9218	30960	0.669054	0.436897	0.232157	-0.466336
COG5	Cog5	10466	238123	0.506734	0.297913	0.208821	-0.46553
FOXN3	Foxn3	1112	71375	0.764271	0.461965	0.302306	-0.464978
PBX4	Pbx4	80714	80720	0.528058	0.334546	0.193511	-0.462218
CEP85L	Cep85l	387119	100038725	0.578537	0.386781	0.191756	-0.461387
CCNT2	Ccnt2	905	72949	0.618153	0.415234	0.202919	-0.459932
FUT1	Fut1	2523	14343	0.587395	0.39448	0.192915	-0.459425
RPL24	Rpl24	6152	68193	0.617939	0.415369	0.20257	-0.45905
TUBB2A	Tubb2b	7280	73710	0.538699	0.349339	0.189359	-0.458963
BGN	Bgn	633	12111	0.508758	0.30655	0.202208	-0.458639
PRELP	Prelp	5549	116847	0.639074	0.426952	0.212122	-0.458363
FADD	Fadd	8772	14082	0.599539	0.404631	0.194909	-0.458127
KPNA1	Kpna1	3836	16646	0.637396	0.426451	0.210945	-0.457387
LRRC8C	Lrrc8c	84230	100604	0.683223	0.44567	0.237552	-0.456521
IPO7	Ipo7	10527	233726	0.647723	0.432165	0.215558	-0.455883
SERPINB13	Serpinb13	5275	241196	0.511556	0.312258	0.199298	-0.455849
RASSF6	Rassf6	166824	73246	0.605922	0.410086	0.195836	-0.455801
GLTP	Gltp	51228	56356	0.580762	0.391349	0.189413	-0.45533
ORAOV1	Oraov1	220064	72284	0.539964	0.352479	0.187486	-0.455255
CENPW	Cenpw	387103	66311	0.485631	0.260249	0.225382	-0.454681
RPL39	Rpl39	6170	67248	0.515083	0.319138	0.195945	-0.45418
KCTD5	Kctd5	54442	69259	0.602585	0.409205	0.19338	-0.452845
VPS53	Vps53	55275	68299	0.679133	0.446281	0.232852	-0.451931
SLFN13	Slfn8	146857	276950	0.689873	0.450123	0.23975	-0.450664
SPTSSB	Sptssb	165679	66183	0.497429	0.291536	0.205893	-0.449937
RSU1	Rsu1	6251	20163	0.55719	0.372951	0.184239	-0.4499
CYP27A1	Cyp27a1	1593	104086	0.63451	0.427969	0.206541	-0.449687
CCNT1	Ccnt1	904	12455	0.646872	0.434543	0.212329	-0.449559
HAUS7	Haus7	55559	73738	0.541252	0.357429	0.183823	-0.449129
ATG12	Atg12	9140	67526	0.503374	0.304229	0.199144	-0.44869
C11orf30	2210018M11Rik	56946	233545	0.615872	0.419031	0.196842	-0.447788
KLHL34	Klhl34	257240	245683	0.680551	0.448225	0.232326	-0.447665
CHRDL2	Chrdl2	25884	69121	0.533191	0.349642	0.183549	-0.447248
VGLL4	Vgll4	9686	232334	0.548587	0.365756	0.182831	-0.447216
ZC3H6	Zc3h6	376940	78751	0.828457	0.477666	0.350791	-0.446275
HSPE1-MOB4	Mob4	100529241	19070	0.566693	0.383378	0.183315	-0.446159
AMIGO3	Amigo3	386724	320844	0.638949	0.432768	0.206181	-0.444844
KRTAP19-5	Krtap16-3	337972	71369	0.46053	0.202518	0.258012	-0.444566
EPS15L1	Eps15l1	58513	13859	0.561813	0.379608	0.182205	-0.444358
CNTN5	Cntn5	53942	244682	0.590898	0.405256	0.185642	-0.444352
SDE2	Sde2	163859	208768	0.553476	0.37286	0.180615	-0.443797
NLRP9	Nlrp9c	338321	330490	0.488036	0.274278	0.213758	-0.443666
FAM110B	Fam110b	90362	242297	0.552477	0.371968	0.180508	-0.442984
SH3BP2	Sh3bp2	6452	24055	0.724559	0.463615	0.260944	-0.442613
HUS1B	Hus1b	135458	210554	0.522125	0.337442	0.184684	-0.442443
NFYA	Nfya	4800	18044	0.625818	0.427073	0.198745	-0.441731
ORM2	Orm3	5005	18407	0.461421	0.208268	0.253153	-0.441532
OOEP	Ooep	441161	67968	0.600572	0.413265	0.187307	-0.441466
TSSK1B	Tssk1	83942	22114	0.504652	0.311079	0.193574	-0.439956
PCDHB4	Pcdhb5	56131	93876	0.643505	0.436872	0.206632	-0.439951
KRTAP2-1	Gm11562	81872	100502803	0.476068	0.25012	0.225948	-0.439911
VAMP8	Vamp8	8673	22320	0.505624	0.312592	0.193032	-0.439594
NAPSA	Napsa	9476	16541	0.512124	0.324499	0.187626	-0.438718
SLFN13	Slfn9	146857	237886	0.689873	0.455901	0.233972	-0.437552
SLC4A11	Slc4a11	83959	269356	0.636688	0.434865	0.201824	-0.437285
STK17B	Stk17b	9262	98267	0.566096	0.387797	0.178299	-0.436355
TOR1AIP2	Tor1aip2	163590	240832	0.675497	0.451235	0.224262	-0.436207
GBP4	Gbp9	115361	236573	0.578958	0.400262	0.178696	-0.43527
CACNG1	Cacng1	786	12299	0.634491	0.434446	0.200045	-0.435246
PCDHB4	Pcdhb7	56131	93878	0.643505	0.4389	0.204605	-0.4345
CPLX1	Cplx1	10815	12889	0.639654	0.437735	0.201919	-0.434211
UMPS	Umps	7372	22247	0.594004	0.411934	0.18207	-0.433832
ORM2	Orm2	5005	18406	0.461421	0.215905	0.245516	-0.433724
CALU	Calu	813	12321	0.566787	0.390166	0.176621	-0.433507
CHCHD10	Chchd10	400916	103172	0.506559	0.319265	0.187294	-0.431844
MEGF9	Megf9	1955	230316	0.691483	0.458548	0.232935	-0.431792
DPM2	Dpm2	8818	13481	0.460241	0.214077	0.246164	-0.431241
CDC73	Cdc73	79577	214498	0.662852	0.448739	0.214113	-0.431174
C1GALT1	C1galt1	56913	94192	0.562355	0.387467	0.174888	-0.430691
HIST3H2BB	Hist1h2br	128312	665622	0.602542	0.419111	0.183431	-0.430395
C20orf195	BC051628	79025	332713	0.510602	0.327668	0.182934	-0.430094
DNMT3L	Dnmt3l	29947	54427	0.546645	0.372494	0.174151	-0.430084
ZNF107	Zfp11	51427	22648	0.56218	0.387609	0.174572	-0.43008
CLEC4G	Clec4g	339390	75863	0.481777	0.27204	0.209737	-0.430026
DCTN5	Dctn5	84516	59288	0.527211	0.351826	0.175385	-0.429148
UBE2W	Ube2w	55284	66799	0.553743	0.38014	0.173603	-0.429119
SLC46A1	Slc46a1	113235	52466	0.558919	0.385459	0.173459	-0.42869
SLC25A36	Slc25a36	55186	192287	0.564696	0.390784	0.173912	-0.428481
STAMBP	Stambp	10617	70527	0.564917	0.390932	0.173985	-0.428409
HPS4	Hps4	89781	192232	0.575996	0.40108	0.174917	-0.428164
ZNRD1	Znrd1	30834	66136	0.49035	0.292823	0.197527	-0.428026
SLC26A2	Slc26a2	1836	13521	0.675815	0.455262	0.220552	-0.427881
C7orf55	1110001J03Rik	154791	66117	0.559291	0.386222	0.173069	-0.427714
TYW5	Tyw5	129450	68736	0.594314	0.415457	0.178857	-0.426899
PDGFD	Pdgfd	80310	71785	0.50032	0.313793	0.186527	-0.424744
RHOXF1	Rhox3e	158800	100135657	0.549506	0.377802	0.171704	-0.424505
PA2G4	Pa2g4	5036	18813	0.543234	0.371774	0.17146	-0.424268
C2orf40	1500015O10Rik	84417	78896	0.604882	0.4234	0.181482	-0.423982
SNAP47	Snap47	116841	67826	0.518056	0.342888	0.175168	-0.423865
UHMK1	Uhmk1	127933	16589	0.710551	0.46844	0.242111	-0.423375
LSM8	Lsm8	51691	76522	0.879977	0.490713	0.389264	-0.42334
AGPAT3	Agpat3	56894	28169	0.705846	0.46709	0.238756	-0.4233
MASP2	Masp2	10747	17175	0.504582	0.321257	0.183326	-0.423104
RNF141	Rnf141	50862	67150	0.546365	0.375199	0.171166	-0.423022
HEMK1	Hemk1	51409	69536	0.494462	0.305947	0.188516	-0.42231
AGTR1	Agtr1b	185	11608	0.498464	0.312393	0.186071	-0.422105
PRPF31	Prpf31	26121	68988	0.638157	0.441976	0.196181	-0.421841
PRPF40A	Prpf40a	55660	56194	0.694239	0.463674	0.230565	-0.420952
GTPBP10	Gtpbp10	85865	207704	0.63835	0.442381	0.195969	-0.420824
CNTNAP3	Cntnap3	79937	238680	0.584477	0.410636	0.173841	-0.420671
GAB3	Gab3	139716	210710	0.499864	0.315634	0.184231	-0.420517
SPATA5	Spata5	166378	57815	0.676531	0.458465	0.218066	-0.42032
LGALS8	Lgals8	3964	56048	0.596957	0.419878	0.177078	-0.420068
HAMP	Hamp2	57817	66438	0.47106	0.256208	0.214853	-0.419441
GPRIN3	Gprin3	285513	243385	0.604566	0.424902	0.179664	-0.419028
DCAF17	Dcaf17	80067	75763	0.577901	0.406873	0.171028	-0.418666
CYBA	Cyba	1535	13057	0.688544	0.463082	0.225462	-0.418296
TCEAL1	Tceal1	9338	237052	0.531773	0.363256	0.168517	-0.41747
C6orf89	BC004004	221477	80748	0.57289	0.404007	0.168884	-0.416576
ZNF652	Zfp652	22834	268469	0.833054	0.490496	0.342558	-0.416468
PRR11	Prr11	55771	270906	0.62746	0.438948	0.188512	-0.415997
KRTAP19-5	Krtap19-3	337972	77918	0.46053	0.231331	0.229199	-0.415248
ORM2	Orm1	5005	18405	0.461421	0.235193	0.226228	-0.415112
ELANE	Elane	1991	50701	0.633864	0.442399	0.191466	-0.414713
SYNDIG1	Syndig1	79953	433485	0.544057	0.377417	0.166641	-0.413587
EME2	Eme2	197342	193838	0.520741	0.351503	0.169238	-0.413487
ZNF430	Zfp457	80264	431706	0.465363	0.247792	0.217571	-0.413397
PAPOLG	Papolg	64895	216578	0.691575	0.466404	0.225171	-0.413383
CLIC3	Clic3	9022	69454	0.639877	0.446225	0.193652	-0.413309
RPL39L	Rpl39l	116832	68172	0.467237	0.252704	0.214533	-0.413148
PPP6C	Ppp6c	5537	67857	0.51007	0.337886	0.172184	-0.412895
GSTM3	Gstm5	2947	14866	0.49927	0.319806	0.179463	-0.412709
ATG4B	Atg4b	23192	66615	0.537928	0.372299	0.165629	-0.411966
ZNF430	Zfp458	80264	238690	0.465363	0.249669	0.215694	-0.411482
TMEM220	Tmem220	388335	338369	0.513751	0.3444	0.169351	-0.410728
CEP72	Cep72	55722	74470	0.580539	0.412692	0.167846	-0.410725
FAM159B	Fam159b	100132916	77803	0.485141	0.296539	0.188601	-0.41062
ZNF430	Zfp708	80264	432769	0.465363	0.250518	0.214845	-0.410352
UBE2L3	Ube2l3	7332	22195	0.494136	0.312495	0.181641	-0.4103
RHOXF1	Rhox3c	158800	100135654	0.549506	0.385594	0.163912	-0.409821
SBSPON	Sbspon	157869	226866	0.513189	0.344474	0.168715	-0.409363
SNTG2	Sntg2	54221	268534	0.516854	0.348877	0.167977	-0.409356
C19orf45	1700019B03Rik	374877	76406	0.578078	0.411494	0.166584	-0.408568
EPHX3	Ephx3	79852	71932	0.549152	0.385846	0.163306	-0.40844
CUL3	Cul3	8452	26554	0.657099	0.456427	0.200672	-0.408055
ABHD2	Abhd2	11057	54608	0.730286	0.479557	0.25073	-0.40802
ATP5S	Atp5s	27109	68055	0.490099	0.307064	0.183035	-0.407641
SLC9A8	Slc9a8	23315	77031	0.601161	0.427854	0.173307	-0.407576
DBI	Dbi	1622	13167	0.509846	0.341028	0.168818	-0.407253
A1BG	A1bg	1	117586	0.55035	0.387796	0.162554	-0.406602
S100PBP	S100pbp	64766	74648	0.48449	0.298558	0.185932	-0.406416
TMEM175	Tmem175	84286	72392	0.55655	0.394262	0.162287	-0.406064
HLA-F	H2-M3	3134	14991	0.460221	0.241148	0.219073	-0.405357
SEPSECS	Sepsecs	51091	211006	0.549745	0.388159	0.161587	-0.404852
CTSV	Ctsl	1515	13039	0.592199	0.423771	0.168428	-0.404516
TTPAL	Ttpal	79183	76080	0.588044	0.420938	0.167106	-0.403725
CD46	Cd46	4179	17221	0.486691	0.304842	0.181848	-0.403604
TNFRSF8	Tnfrsf8	943	21941	0.589639	0.422527	0.167112	-0.403488
FAM129A	Fam129a	116496	63913	0.606092	0.433752	0.17234	-0.40234
ADRM1	Adrm1	11047	56436	0.628385	0.444778	0.183607	-0.402237
FAM127B	Cxx1a	26071	66158	0.588747	0.422109	0.166638	-0.402157
ERAS	Eras	3266	353283	0.465405	0.257906	0.207499	-0.401966
SNRNP48	Snrnp48	154007	67797	0.473232	0.276696	0.196536	-0.401621
EIF4EBP2	Eif4ebp2	1979	13688	0.664191	0.461915	0.202276	-0.400656
PLAG1	Plag1	5324	56711	0.629395	0.446073	0.183321	-0.400575
RAB11A	Rab11a	8766	53869	0.542576	0.382258	0.160318	-0.400523
CCDC130	Ccdc130	81576	67736	0.608036	0.435548	0.172488	-0.400052
PKP2	Pkp2	5318	67451	0.62807	0.445902	0.182168	-0.399223
OSBPL2	Osbpl2	9885	228983	0.474884	0.283945	0.190939	-0.39894
MTMR9	Mtmr9	66036	210376	0.703361	0.476483	0.226878	-0.397422
FBXW5	Fbxw5	54461	30839	0.608727	0.437113	0.171613	-0.39696
ARL6IP6	Arl6ip6	151188	65103	0.737334	0.48608	0.251255	-0.396138
NOTO	Noto	344022	384452	0.505931	0.34107	0.164862	-0.396022
MIEN1	Mien1	84299	103742	0.638822	0.453186	0.185636	-0.395823
OR11A1	Olfr96	26531	258507	0.425475	0.141531	0.283944	-0.395548
NANOS3	Nanos3	342977	244551	0.493757	0.321476	0.172282	-0.395064
ARFGAP1	Arfgap1	55738	228998	0.526532	0.367928	0.158604	-0.394479
TMEM190	Tmem190	147744	78052	0.515875	0.356133	0.159742	-0.394387
APRT	Aprt	353	11821	0.557487	0.401152	0.156335	-0.394205
RAP1A	Rap1a	5906	109905	0.549268	0.392957	0.156311	-0.394179
SLC6A3	Slc6a3	6531	13162	0.525015	0.366531	0.158483	-0.393959
EFCAB14	Efcab14	9813	230648	0.569126	0.411125	0.158001	-0.393906
PCDHB5	Pcdhb4	26167	93875	0.656083	0.461733	0.19435	-0.393759
NXF2	Nxf7	56001	170722	0.463534	0.261072	0.202462	-0.393604
GBP4	Gbp4	115361	17472	0.578958	0.419383	0.159575	-0.393135
GUCY1A3	Gucy1a3	2982	60596	0.694835	0.475657	0.219178	-0.392981
DCAF4	Dcaf4	26094	73828	0.494289	0.324241	0.170048	-0.392752
SLC11A1	Slc11a1	6556	18173	0.576708	0.417951	0.158758	-0.392602
KLHL6	Klhl6	89857	239743	0.547716	0.392345	0.155371	-0.392216
JAKMIP2	Jakmip2	9832	76217	0.763152	0.493363	0.269789	-0.390855
POLH	Polh	5429	80905	0.648306	0.459549	0.188757	-0.390314
WDR27	Wdr27	253769	71682	0.531722	0.376357	0.155365	-0.389811
ZNF709	Zfp872	163051	619310	0.494923	0.32754	0.167384	-0.38934
KIAA0101	2810417H13Rik	9768	68026	0.506574	0.346053	0.160522	-0.389176
HIST1H2BK	Hist1h2br	85236	665622	0.576445	0.419111	0.157334	-0.388935
SURF2	Surf2	6835	20931	0.538233	0.384259	0.153973	-0.388442
AXIN1	Axin1	8312	12005	0.629859	0.451622	0.178237	-0.387485
CXorf38	1810030O07Rik	159013	69155	0.505745	0.345817	0.159927	-0.387406
LDLRAD4	Ldlrad4	753	52662	0.750168	0.492881	0.257288	-0.387004
ZNF254	Zfp457	9534	431706	0.456505	0.247792	0.208713	-0.386865
SPATS2L	Spats2l	26010	67198	0.618942	0.446454	0.172488	-0.386244
DCAF12L1	Dcaf12l2	139170	245403	0.597658	0.434854	0.162804	-0.386164
KCNG1	Kcng1	3755	241794	0.662492	0.467727	0.194764	-0.385762
COX6B2	Cox6b2	125965	333182	0.478747	0.302629	0.176118	-0.385759
FAM135B	Fam135b	51059	70363	0.624004	0.449744	0.17426	-0.385187
ZNF254	Zfp458	9534	238690	0.456505	0.249669	0.206836	-0.384949
GGPS1	Ggps1	9453	14593	0.471634	0.287878	0.183755	-0.384816
AHRR	Ahrr	57491	11624	0.55859	0.406561	0.152029	-0.384336
TLCD2	Tlcd2	727910	380712	0.492739	0.327147	0.165592	-0.384063
SLITRK4	Slitrk4	139065	245446	0.733419	0.490739	0.242679	-0.383994
SNX29	Snx29	92017	74478	0.724506	0.48849	0.236017	-0.383973
ZNF254	Zfp708	9534	432769	0.456505	0.250518	0.205987	-0.38382
HOXB13	Hoxb13	10481	15408	0.590648	0.431789	0.15886	-0.383569
TSPAN6	Tspan6	7105	56496	0.520848	0.366509	0.154339	-0.3833
CD7	Cd7	924	12516	0.431159	0.177291	0.253868	-0.383194
SNAP29	Snap29	9342	67474	0.611188	0.443855	0.167334	-0.382647
CEP41	Cep41	95681	83922	0.549524	0.399393	0.150131	-0.382618
GPCPD1	Gpcpd1	56261	74182	0.568719	0.41664	0.152079	-0.381654
CORO7-PAM16	Coro7	100529144	78885	0.617165	0.447094	0.170071	-0.381642
TSPAN14	Tspan14	81619	52588	0.542946	0.392516	0.15043	-0.381439
ZRANB1	Zranb1	54764	360216	0.562231	0.411191	0.151039	-0.380831
CDK2AP2	Cdk2ap2	10263	52004	0.638528	0.458971	0.179557	-0.38077
GPHB5	Gphb5	122876	217674	0.551712	0.40183	0.149882	-0.380734
HGFAC	Hgfac	3083	54426	0.579513	0.424664	0.154849	-0.38072
UTS2R	Uts2r	2837	217369	0.507046	0.351633	0.155413	-0.380323
MAP3K3	Map3k3	4215	26406	0.526451	0.374936	0.151515	-0.380223
CARKD	Carkd	55739	69225	0.522267	0.370356	0.15191	-0.379859
TSGA13	Tsga13	114960	116732	0.440046	0.21119	0.228855	-0.379737
NR2C2AP	Nr2c2ap	126382	75692	0.506899	0.351726	0.155173	-0.379498
METTL8	Mettl8	79828	228019	0.663598	0.470886	0.192713	-0.37945
ANKRD13C	Ankrd13c	81573	433667	0.65187	0.465487	0.186383	-0.379424
LYPD4	Lypd4	147719	232973	0.450673	0.240498	0.210175	-0.379259
COPS2	Cops2	9318	12848	0.534271	0.385803	0.148468	-0.377734
FASTKD2	Fastkd2	22868	75619	0.544519	0.396095	0.148424	-0.377653
SLC13A1	Slc13a1	6561	55961	0.462123	0.270969	0.191154	-0.377507
RCOR1	Rcor1	23186	217864	0.630663	0.456573	0.17409	-0.377177
MLST8	Mlst8	64223	56716	0.529908	0.380935	0.148973	-0.37703
TPPP	Tppp	11076	72948	0.677171	0.476487	0.200684	-0.376959
CTNS	Ctns	1497	83429	0.530392	0.38143	0.148962	-0.376586
ALPPL2	Alpi	251	76768	0.492718	0.331899	0.160819	-0.37649
H2AFB1	Gm14920	474382	100039319	0.467111	0.28492	0.182191	-0.376389
KIN	Kin	22944	16588	0.592934	0.436417	0.156517	-0.375779
TMED5	Tmed5	50999	73130	0.6583	0.470331	0.187969	-0.375452
HAUS6	Haus6	54801	230376	0.652613	0.467934	0.18468	-0.375196
NAIP	Naip2	4671	17948	0.590679	0.435549	0.15513	-0.374736
HRASLS	Hrasls	57110	27281	0.521336	0.372021	0.149315	-0.374264
CETN2	Cetn2	1069	26370	0.485168	0.32067	0.164498	-0.373999
PXMP4	Pxmp4	11264	59038	0.490591	0.32966	0.160931	-0.373536
2017-03-03	2017-03-03	115123	320253	0.52534	0.376929	0.148411	-0.37343
REPS1	Reps1	85021	19707	0.552158	0.405878	0.14628	-0.373335
PRG4	Prg4	10216	96875	0.625998	0.456039	0.169959	-0.373239
FAM83B	Fam83b	222584	208994	0.633327	0.45926	0.174067	-0.373229
ZNF566	Zfp566	84924	72556	0.436924	0.209215	0.227709	-0.372407
FBXO8	Fbxo8	26269	50753	0.554415	0.40908	0.145335	-0.371851
MFSD7	Mfsd7a	84179	243197	0.527874	0.381238	0.146636	-0.371584
SPATA22	Spata22	84690	380709	0.459686	0.269479	0.190207	-0.371341
TUBB2B	Tubb2a	347733	22151	0.584185	0.432008	0.152176	-0.37134
HOXD12	Hoxd12	3238	15432	0.635856	0.46163	0.174226	-0.371199
LARGE	Large	9215	16795	0.558929	0.413246	0.145683	-0.371089
LYRM2	Lyrm2	57226	108755	0.475893	0.306618	0.169274	-0.370821
RGAG1	Rgag1	57529	209540	0.512533	0.363368	0.149165	-0.370753
ACTB	Actg1	60	11465	0.664182	0.474531	0.189651	-0.370647
CDHR3	Cdhr3	222256	68764	0.552374	0.407231	0.145142	-0.370429
YOD1	Yod1	55432	226418	0.619671	0.453554	0.166116	-0.370025
H2AFB2	Gm14920	474381	100039319	0.46484	0.28492	0.17992	-0.369848
NPY	Npy	4852	109648	0.531055	0.386463	0.144592	-0.368943
P2RY2	P2ry2	5029	18442	0.648942	0.469564	0.179378	-0.368435
GATSL3	Gatsl3	652968	71962	0.58852	0.436569	0.151951	-0.368107
CD8A	Cd8a	925	12525	0.596443	0.442069	0.154374	-0.366737
PTX4	Ptx4	390667	68509	0.469545	0.298769	0.170776	-0.366515
SNCA	Snca	6622	20617	0.475184	0.30881	0.166374	-0.365755
GAL3ST2	Gal3st2	64090	381334	0.529954	0.387176	0.142777	-0.365545
CXorf49B	4933412E24Rik	100132994	71088	0.508839	0.361771	0.147068	-0.3654
KMO	Kmo	8564	98256	0.512277	0.36565	0.146627	-0.365069
ZNF430	Zfp273	80264	212569	0.465363	0.290278	0.175085	-0.364632
ZBED4	Zbed4	9889	223773	0.704342	0.491128	0.213213	-0.36463
TRABD	Trabd	80305	67976	0.508634	0.361824	0.14681	-0.364627
NLRP4	Nlrp4e	147945	446099	0.522065	0.377864	0.144202	-0.363904
STC2	Stc2	8614	20856	0.621254	0.45728	0.163974	-0.36379
PCDHB15	Pcdhb22	56121	93893	0.667756	0.479046	0.188711	-0.362908
IPPK	Ippk	64768	75678	0.617239	0.455648	0.161591	-0.362746
PDE4C	Pde4c	5143	110385	0.635694	0.464685	0.171009	-0.362734
DYNLL1	Dynll1	8655	56455	0.547958	0.407507	0.140451	-0.361378
FEZ1	Fez1	9638	235180	0.433661	0.211033	0.222628	-0.361099
SLC15A2	Slc15a2	6565	57738	0.513463	0.369148	0.144316	-0.361031
HIST2H2BF	Hist1h2br	440689	665622	0.561184	0.419111	0.142073	-0.361031
NLRP4	Nlrp4f	147945	97895	0.522065	0.379199	0.142867	-0.361007
RGS11	Rgs11	8786	50782	0.513393	0.369102	0.144291	-0.360971
GRIN2A	Grin2a	2903	14811	0.928946	0.519973	0.408972	-0.360852
APOL4	Apol11a	80832	626615	0.45164	0.260324	0.191317	-0.360269
LZTS1	Lzts1	11178	211134	0.514269	0.37078	0.143489	-0.360002
ISCU	Iscu	23479	66383	0.591354	0.442181	0.149174	-0.359898
TTC30A	Ttc30a1	92104	78802	0.562258	0.420925	0.141332	-0.359673
TRAPPC12	Trappc12	51112	217449	0.650075	0.473419	0.176656	-0.359612
TMEM120B	Tmem120b	144404	330189	0.639302	0.468672	0.17063	-0.359329
TMEM135	Tmem135	65084	72759	0.736305	0.502121	0.234184	-0.359236
MOCS2	Mocs2	4338	17434	0.464334	0.292432	0.171902	-0.359139
KATNA1	Katna1	11104	23924	0.569356	0.426465	0.142891	-0.359068
ZNF430	Zfp58	80264	238693	0.465363	0.295176	0.170188	-0.358984
ZRANB3	Zranb3	84083	226409	0.642989	0.470202	0.172787	-0.358966
NSL1	Nsl1	25936	381318	0.76419	0.507904	0.256285	-0.358605
MFSD8	Mfsd8	256471	72175	0.537683	0.398907	0.138776	-0.358503
TRPC6	Trpc6	7225	22068	0.514308	0.371779	0.142528	-0.358392
NME8	Nme8	51314	73412	0.549593	0.410349	0.139244	-0.358075
TRAPPC2L	Trappc2l	51693	59005	0.621432	0.459485	0.161947	-0.357968
IL16	Il16	3603	16170	0.598556	0.4469	0.151656	-0.357805
HIPK2	Hipk2	28996	15258	0.94432	0.522213	0.422107	-0.35714
FOXR1	Foxr1	283150	382074	0.459631	0.282149	0.177481	-0.357138
FAM46C	Fam46c	54855	74645	0.533291	0.394879	0.138412	-0.357095
CREB3L3	Creb3l3	84699	208677	0.553142	0.414442	0.1387	-0.357002
GPATCH2L	Gpatch2l	55668	70373	0.854669	0.51834	0.336329	-0.356943
APBB1IP	Apbb1ip	54518	54519	0.531999	0.393472	0.138527	-0.356702
SOCS4	Socs4	122809	67296	0.706277	0.49521	0.211067	-0.356587
PCSK1	Pcsk1	5122	18548	0.505271	0.361057	0.144214	-0.356485
GRHPR	Grhpr	9380	76238	0.586452	0.43946	0.146993	-0.356413
NLRP1	Nlrp1b	22861	637515	0.496457	0.349946	0.146511	-0.356143
PRAM1	Pram1	84106	378460	0.45276	0.266784	0.185976	-0.355751
FSD2	Fsd2	123722	244091	0.555254	0.41722	0.138034	-0.355374
P4HB	P4hb	5034	18453	0.594973	0.445788	0.149185	-0.354946
PANK4	Pank4	55229	269614	0.646434	0.473616	0.172818	-0.354735
MCOLN1	Mcoln1	57192	94178	0.547429	0.410059	0.13737	-0.354675
KCNK10	Kcnk10	54207	72258	0.650101	0.475357	0.174744	-0.354557
LONP2	Lonp2	83752	66887	0.568994	0.428008	0.140986	-0.354548
GLRA3	Glra3	8001	110304	0.494476	0.347954	0.146522	-0.354544
PWWP2B	Pwwp2b	170394	101631	0.577583	0.434947	0.142635	-0.353637
CALML4	Calml4	91860	75600	0.444175	0.248475	0.195701	-0.353379
GNB4	Gnb4	59345	14696	0.620949	0.461352	0.159597	-0.353255
GCDH	Gcdh	2639	270076	0.550188	0.413518	0.13667	-0.352953
S100A10	S100a10	6281	20194	0.525555	0.388011	0.137544	-0.35224
ATP6V0C	Atp6v0c	527	11984	0.594276	0.44663	0.147647	-0.352001
GALP	Galp	85569	232836	0.4191	0.175829	0.243271	-0.351796
BTN3A2	Skint8	11118	639774	0.407198	0.131043	0.276155	-0.351318
TMED4	Tmed4	222068	103694	0.509638	0.36949	0.140149	-0.351275
RECQL	Recql	5965	19691	0.513154	0.373435	0.139719	-0.351208
TMEM41B	Tmem41b	440026	233724	0.557272	0.420707	0.136565	-0.350715
KLHL15	Klhl15	80311	236904	0.631912	0.468348	0.163563	-0.350519
B9D2	B9d2	80776	232987	0.539522	0.404153	0.135368	-0.350255
ZFPL1	Zfpl1	7542	81909	0.507923	0.367476	0.140447	-0.349796
CISD2	Cisd2	493856	67006	0.539758	0.404758	0.135	-0.349699
POLR2M	Polr2m	81488	28015	0.524756	0.388531	0.136224	-0.349528
APOL4	Apol7c	80832	108956	0.45164	0.269934	0.181707	-0.348974
ENPP1	Enpp1	5167	18605	0.679981	0.48974	0.190241	-0.348629
MYBPC2	Mybpc2	4606	233199	0.6517	0.478399	0.173301	-0.34826
LETM1	Letm1	3954	56384	0.573605	0.434577	0.139028	-0.348037
QRFP	Qrfp	347148	227717	0.49244	0.348652	0.143789	-0.347978
NOL7	Nol7	51406	70078	0.581889	0.440299	0.14159	-0.347826
TUBGCP2	Tubgcp2	10844	74237	0.596288	0.449768	0.14652	-0.347476
WDR5	Wdr5	11091	140858	0.517378	0.380259	0.137119	-0.347434
GMDS	Gmds	2762	218138	0.470935	0.313106	0.15783	-0.347434
MTM1	Mtm1	4534	17772	0.583741	0.441923	0.141818	-0.347188
PARP8	Parp8	79668	52552	0.66887	0.486125	0.182744	-0.346935
SIKE1	Sike1	80143	66641	0.545416	0.411589	0.133826	-0.346811
NCOA7	Ncoa7	135112	211329	0.586477	0.443765	0.142713	-0.346602
RHOXF1	Rhox4g	158800	664608	0.549506	0.416066	0.13344	-0.346274
ZNF317	Zfp317	57693	244713	0.496952	0.356331	0.140621	-0.346166
CDK11B	Cdk11b	984	12537	0.699532	0.497413	0.202119	-0.345888
ANKRD34C	Ankrd34c	390616	330998	0.491274	0.347845	0.143429	-0.345826
PLP2	Plp2	5355	18824	0.529248	0.396054	0.133193	-0.345578
CHORDC1	Chordc1	26973	66917	0.552407	0.418534	0.133873	-0.345538
ZNF280C	Zfp280c	55609	208968	0.509778	0.372737	0.137041	-0.345456
PSPN	Pspn	5623	19197	0.462943	0.300784	0.162159	-0.345161
TPO	Tpo	7173	22018	0.57093	0.434042	0.136888	-0.34497
GPER1	Gper1	2852	76854	0.486024	0.340662	0.145361	-0.344929
APOL3	Apol11a	80833	626615	0.445877	0.260324	0.185553	-0.344814
PIH1D1	Pih1d1	55011	68845	0.682191	0.492269	0.189922	-0.344487
ACOT9	Acot10	23597	64833	0.441319	0.249935	0.191383	-0.344366
GBP4	Gbp3	115361	55932	0.578958	0.439724	0.139234	-0.344223
NOP14	Nop14	8602	75416	0.69992	0.498535	0.201385	-0.344199
GAL	Gal	51083	14419	0.520354	0.385873	0.134481	-0.344042
TPCN2	Tpcn2	219931	233979	0.571363	0.434999	0.136364	-0.343464
CNTNAP2	Cntnap2	26047	66797	0.810151	0.520253	0.289899	-0.343293
GABRG1	Gabrg1	2565	14405	0.639476	0.475323	0.164154	-0.3431
TAX1BP3	Tax1bp3	30851	76281	0.460454	0.296267	0.164186	-0.342938
DAPL1	Dapl1	92196	76747	0.529811	0.398516	0.131296	-0.342926
MEF2D	Mef2d	4209	17261	0.57615	0.438453	0.137697	-0.342487
PARVA	Parva	55742	57342	0.740086	0.510589	0.229497	-0.342315
PRKX	Prkx	5613	19108	0.67473	0.490494	0.184237	-0.341826
TTC33	Ttc33	23548	67515	0.565286	0.430482	0.134805	-0.341621
ZNF273	Zfp457	10793	431706	0.439407	0.247792	0.191615	-0.341607
PTDSS2	Ptdss2	81490	27388	0.533948	0.403424	0.130524	-0.341301
ENPP7	Enpp7	339221	238011	0.501102	0.363598	0.137503	-0.341156
RAB40B	Rab40b	10966	217371	0.651835	0.481638	0.170197	-0.341109
RAB8A	Rab8a	4218	17274	0.569528	0.434732	0.134796	-0.340832
C5orf47	4930524B15Rik	133491	67592	0.475671	0.325598	0.150074	-0.340828
MEIOB	Meiob	254528	75178	0.491421	0.351037	0.140384	-0.340562
CDK6	Cdk6	1021	12571	0.879303	0.527357	0.351946	-0.340045
ZNF273	Zfp458	10793	238690	0.439407	0.249669	0.189738	-0.339691
RASD1	Rasd1	51655	19416	0.763362	0.51616	0.247202	-0.339
NMU	Nmu	10874	56183	0.431823	0.227766	0.204058	-0.338839
ZNF273	Zfp708	10793	432769	0.439407	0.250518	0.188889	-0.338562
MSLN	Msln	10232	56047	0.505338	0.369952	0.135386	-0.338179
ZNF254	Zfp273	9534	212569	0.456505	0.290278	0.166227	-0.3381
RETN	Retn	56729	57264	0.541837	0.412119	0.129718	-0.337691
AASS	Aass	10157	30956	0.575416	0.439834	0.135583	-0.337489
CPPED1	Cpped1	55313	223978	0.578811	0.442546	0.136265	-0.337473
TFPI2	Tfpi2	7980	21789	0.481995	0.338964	0.143032	-0.337318
ADAMTS13	Adamts13	11093	279028	0.613445	0.463706	0.14974	-0.337037
PTCH1	Ptch1	5727	19206	0.767651	0.517505	0.250146	-0.336459
LEPROT	Leprot	54741	230514	0.463983	0.308178	0.155806	-0.336385
RIBC2	Ribc2	26150	67747	0.497702	0.361701	0.136	-0.336381
TBL1X	Tbl1x	6907	21372	0.641703	0.478623	0.163079	-0.336341
LRRC14	Lrrc14	9684	223664	0.639049	0.477808	0.161241	-0.336128
DNAJC5	Dnajc5	80331	13002	0.602599	0.458672	0.143927	-0.33597
PRR14	Prr14	78994	233895	0.521821	0.392101	0.129719	-0.335834
SHPK	Shpk	23729	74637	0.505265	0.371443	0.133822	-0.33566
PCGF5	Pcgf5	84333	76073	0.638686	0.477796	0.16089	-0.33565
SUPT7L	Supt7l	9913	72195	0.489917	0.351123	0.138794	-0.335513
FAM105A	Fam105a	54491	223433	0.620854	0.468977	0.151877	-0.335022
TMA7	Tma7	51372	66167	0.459298	0.29902	0.160278	-0.334944
FECH	Fech	2235	14151	0.621676	0.469967	0.15171	-0.334134
SLC35A3	Slc35a3	23443	229782	0.560341	0.429822	0.130519	-0.334111
NDRG1	Ndrg1	10397	17988	0.546862	0.418849	0.128014	-0.333619
LMO4	Lmo4	8543	16911	0.623739	0.471397	0.152342	-0.333538
APOL3	Apol7c	80833	108956	0.445877	0.269934	0.175943	-0.333519
SLC25A47	Slc25a47	283600	104910	0.452804	0.286765	0.16604	-0.333074
ZNF254	Zfp58	9534	238693	0.456505	0.295176	0.16133	-0.332452
CLEC14A	Clec14a	161198	66864	0.664589	0.491059	0.173529	-0.332288
SDR16C5	Sdr16c5	195814	242285	0.435291	0.245136	0.190156	-0.331894
PRR15	Prr15	222171	78004	0.507294	0.375629	0.131665	-0.331886
GPR39	Gpr39	2863	71111	0.504416	0.372242	0.132174	-0.33188
FAM24B	1700007K09Rik	196792	69318	0.450741	0.283206	0.167535	-0.331831
MED1	Med1	5469	19014	0.603776	0.461247	0.142529	-0.331705
PDCD6	Pdcd6	10016	18570	0.466355	0.315256	0.151099	-0.331389
SP3	Sp3	6670	20687	0.616303	0.468224	0.148079	-0.33124
PARM1	Parm1	25849	231440	0.552101	0.424295	0.127806	-0.331087
IGF2	Igf2	3481	16002	0.670429	0.494011	0.176417	-0.33088
ZNF430	Zfp738	80264	408068	0.465363	0.313806	0.151558	-0.330649
KRTAP12-1	Gm10142	353332	100502921	0.419806	0.204801	0.215005	-0.330122
NLRP4	Nlrp4a	147945	243880	0.522065	0.395088	0.126978	-0.32997
SLC22A18	Slc22a18	5002	18400	0.445634	0.272248	0.173386	-0.329827
MMS22L	Mms22l	253714	212377	0.720905	0.511367	0.209538	-0.329801
ZNF2	Zfp661	7549	72180	0.518415	0.390859	0.127556	-0.329533
ZKSCAN2	Zkscan2	342357	210162	0.670321	0.494478	0.175843	-0.329403
EFHC2	Efhc2	80258	74405	0.477925	0.337161	0.140764	-0.329184
CCNB1	Ccnb1	891	268697	0.509806	0.380638	0.129168	-0.329111
HNRNPA3	Hnrnpa3	220988	229279	0.63612	0.479106	0.157014	-0.328795
ATP6V0E2	Atp6v0e2	155066	76252	0.47876	0.33873	0.140029	-0.328604
RPL39L	Rpl39	116832	67248	0.467237	0.319138	0.148099	-0.328534
RAB5B	Rab5b	5869	19344	0.585576	0.450677	0.134899	-0.32827
NLRP9	Nlrp9a	338321	233001	0.488036	0.352462	0.135574	-0.327917
PHF13	Phf13	148479	230936	0.578337	0.446026	0.132311	-0.32788
METTL21A	Mettl21a	151194	67099	0.50825	0.379008	0.129242	-0.327754
LGSN	Lgsn	51557	266744	0.523033	0.397962	0.125071	-0.327737
CES3	Ces3a	23491	382053	0.439574	0.261277	0.178297	-0.327261
KLK4	Klk4	9622	56640	0.40663	0.160932	0.245698	-0.327182
TSSC1	Tssc1	7260	380752	0.557695	0.430795	0.1269	-0.326899
ACOT7	Acot7	11332	70025	0.51996	0.394065	0.125895	-0.326483
APOL4	Apol9b	80832	71898	0.45164	0.289784	0.161856	-0.326384
PAH	Pah	5053	18478	0.441443	0.26655	0.174893	-0.326088
ZNF398	Zfp398	57541	272347	0.527806	0.403941	0.123865	-0.326042
OPHN1	Ophn1	4983	94190	0.623776	0.474521	0.149255	-0.325438
KRTAP12-1	Krtap12-1	353332	16694	0.419806	0.209405	0.2104	-0.325261
GPR180	Gpr180	160897	58245	0.69926	0.506628	0.192631	-0.325192
RPA1	Rpa1	6117	68275	0.578176	0.446891	0.131285	-0.325147
DRGX	Prrxl1	644168	107751	0.488897	0.355769	0.133128	-0.324758
HOOK1	Hook1	51361	77963	0.632307	0.478979	0.153328	-0.324549
MOB3A	Mob3a	126308	208228	0.540214	0.417254	0.12296	-0.323635
EIF5	Eif5	1983	217869	0.626141	0.476393	0.149748	-0.323401
SOCS6	Socs6	9306	54607	0.621452	0.474079	0.147373	-0.32335
PAF1	Paf1	54623	54624	0.52085	0.396482	0.124368	-0.323342
DHCR7	Dhcr7	1717	13360	0.488891	0.35646	0.132431	-0.323081
VIPR2	Vipr2	7434	22355	0.530483	0.408096	0.122387	-0.323072
CATSPERD	Catsperd	257062	106757	0.491113	0.359608	0.131505	-0.32301
BGLAP	Bglap2	632	12097	0.443729	0.273897	0.169833	-0.322889
GBP2	Gbp2b	2634	14468	0.443959	0.274466	0.169493	-0.322838
SMU1	Smu1	55234	74255	0.621901	0.474862	0.14704	-0.322222
CETN3	Cetn3	1070	12626	0.483766	0.350025	0.133741	-0.322135
FAM217B	Fam217b	63939	71532	0.494433	0.364268	0.130165	-0.322072
PLIN5	Plin5	440503	66968	0.518469	0.394628	0.123841	-0.321732
ACER3	Acer3	55331	66190	0.580385	0.450021	0.130365	-0.321627
UBE2R2	Ube2r2	54926	67615	0.557602	0.433831	0.123771	-0.320609
TMEM185A	BC023829	84548	236848	0.479073	0.344265	0.134808	-0.320574
FAM212B	Fam212b	55924	109050	0.551909	0.42858	0.123329	-0.320258
NSDHL	Nsdhl	50814	18194	0.461354	0.313158	0.148196	-0.320072
C1QTNF7	C1qtnf7	114905	109323	0.50876	0.384223	0.124536	-0.319911
SLC16A14	Slc16a14	151473	71781	0.51332	0.389609	0.123711	-0.319906
FBXO40	Fbxo40	51725	207215	0.565829	0.439936	0.125893	-0.319626
TIMM44	Timm44	10469	21856	0.508602	0.384041	0.124561	-0.319622
NLRP4	Nlrp4c	147945	83564	0.522065	0.400475	0.12159	-0.319461
KLHDC4	Klhdc4	54758	234825	0.529615	0.409118	0.120497	-0.31922
CUL1	Cul1	8454	26965	0.567461	0.441976	0.125486	-0.319144
CMBL	Cmbl	134147	69574	0.448158	0.287612	0.160546	-0.31901
BGLAP	Bglap	632	12096	0.443729	0.277771	0.165958	-0.31901
ATP6AP1	Atp6ap1	537	54411	0.468915	0.32798	0.140935	-0.318998
RAD18	Rad18	56852	58186	0.537297	0.416886	0.120411	-0.318962
GNPTG	Gnptg	84572	214505	0.487732	0.357431	0.130301	-0.318848
SLC6A14	Slc6a14	11254	56774	0.463681	0.318939	0.144743	-0.318493
CDC123	Cdc123	8872	98828	0.449225	0.290678	0.158547	-0.318465
ZNF14	Zfp958	7561	233987	0.446201	0.284529	0.161672	-0.318248
SPATA6	Spata6	54558	67946	0.531118	0.411077	0.120041	-0.317881
SLC13A2	Slc13a2	9058	20500	0.452339	0.298675	0.153664	-0.317075
LCN8	Lcn8	138307	78076	0.445185	0.28334	0.161844	-0.316975
NKD1	Nkd1	85407	93960	0.767945	0.526516	0.24143	-0.316921
CATSPERG	Catsperg1	57828	320225	0.604854	0.468406	0.136448	-0.316872
PRAF2	Praf2	11230	54637	0.496915	0.370161	0.126754	-0.316743
HIST1H2BL	Hist1h2br	8340	665622	0.53911	0.419111	0.119998	-0.316617
2017-03-01	2017-03-01	55016	72925	0.567788	0.44321	0.124578	-0.316543
NELFA	Nelfa	7469	24116	0.616811	0.474225	0.142586	-0.316537
DSC3	Dsc3	1825	13507	0.706922	0.513263	0.19366	-0.316396
ZNF764	Zfp764	92595	233893	0.539043	0.419258	0.119786	-0.316165
SERPINE2	Serpine2	5270	20720	0.477809	0.344762	0.133048	-0.315986
MYOCD	Myocd	93649	214384	0.692461	0.508677	0.183785	-0.315844
RHOXF1	Rhox4e	158800	194856	0.549506	0.428601	0.120905	-0.31568
FSCN2	Fscn2	25794	238021	0.52646	0.406901	0.119559	-0.315652
EIF4E3	Eif4e3	317649	66892	0.59378	0.461613	0.132167	-0.31549
NAA60	Naa60	79903	74763	0.440191	0.272481	0.16771	-0.315437
APOL4	Apol10b	80832	328561	0.45164	0.298638	0.153002	-0.315433
GPR12	Gpr12	2835	14738	0.572631	0.446977	0.125653	-0.315417
TCEAL7	Tceal7	56849	100040972	0.432753	0.253349	0.179404	-0.3154
C11orf63	4931429I11Rik	79864	70989	0.534307	0.415853	0.118453	-0.315369
SERPINB1	Serpinb1a	1992	66222	0.446058	0.286663	0.159395	-0.315132
UXS1	Uxs1	80146	67883	0.489006	0.360317	0.12869	-0.314954
RER1	Rer1	11079	67830	0.502175	0.377712	0.124463	-0.314623
DIEXF	Diexf	27042	215193	0.705005	0.513452	0.191553	-0.314537
RSL1D1	Rsl1d1	26156	66409	0.533813	0.41579	0.118022	-0.314465
ST13	St13	6767	70356	0.506915	0.384489	0.122425	-0.314194
POP1	Pop1	10940	67724	0.530892	0.412727	0.118165	-0.314154
PSMD10	Psmd10	5716	53380	0.462135	0.319097	0.143038	-0.313919
APOL4	Apol9a	80832	223672	0.45164	0.299955	0.151685	-0.31391
ADARB2	Adarb2	105	94191	0.792	0.530618	0.261381	-0.313831
MCM5	Mcm5	4174	17218	0.552075	0.431882	0.120193	-0.313545
RBMS2	Rbms2	5939	56516	0.725171	0.519604	0.205568	-0.313493
FAM150A	Fam150a	389658	620393	0.466489	0.327306	0.139184	-0.313301
SACS	Sacs	26278	50720	0.942128	0.541548	0.40058	-0.313282
PABPC5	Pabpc5	140886	93728	0.469683	0.333683	0.136	-0.313057
MED17	Med17	9440	234959	0.532188	0.414476	0.117712	-0.312965
CTBS	Ctbs	1486	74245	0.47675	0.345085	0.131666	-0.312865
TLR4	Tlr4	7099	21898	0.460524	0.316131	0.144392	-0.312853
EXD2	Exd2	55218	97827	0.538555	0.420408	0.118146	-0.312643
CDC26	Cdc26	246184	66440	0.506084	0.384032	0.122052	-0.312286
CNRIP1	Cnrip1	25927	380686	0.531179	0.414072	0.117107	-0.312044
ZDHHC11	Zdhhc11	79844	71164	0.44787	0.292697	0.155173	-0.311751
MUC22	Gm9573	100507679	672682	0.557011	0.436892	0.12012	-0.311728
GBP2	Gbp2	2634	14469	0.443959	0.284889	0.15907	-0.311494
LRRIQ1	Lrriq1	84125	74978	0.580039	0.454027	0.126012	-0.311422
DEFB106B	Defb15	503841	246082	0.455502	0.307907	0.147595	-0.311354
APOL3	Apol9b	80833	71898	0.445877	0.289784	0.156093	-0.310929
UAP1	Uap1	6675	107652	0.485161	0.358083	0.127079	-0.310694
MAP7D3	Mtap7d3	79649	320923	0.571668	0.448476	0.123192	-0.31065
MYADM	Myadm	91663	50918	0.548388	0.429754	0.118634	-0.310412
TMEM204	Tmem204	79652	407831	0.521366	0.403812	0.117554	-0.310237
HS6ST3	Hs6st3	266722	50787	0.639747	0.489569	0.150178	-0.309826
RGS12	Rgs12	6002	71729	0.637393	0.488315	0.149078	-0.309664
GIMAP8	Gimap8	155038	243374	0.465599	0.327796	0.137803	-0.30953
PMS1	Pms1	5378	227099	0.506883	0.38666	0.120223	-0.309465
TRH	Trh	7200	22044	0.454089	0.306969	0.14712	-0.309451
METTL15	Mettl15	196074	76894	0.478235	0.348947	0.129289	-0.309413
CYP2D6	Cyp2d22	1565	56448	0.561863	0.441671	0.120191	-0.309165
ZNF430	Zfp595	80264	218314	0.465363	0.327909	0.137454	-0.308599
H6PD	H6pd	9563	100198	0.762519	0.529225	0.233294	-0.307948
OGFR	Ogfr	11054	72075	0.665742	0.5022	0.163542	-0.307768
PIGP	Pigp	51227	56176	0.556806	0.438403	0.118404	-0.307188
CRYBA4	Cryba4	1413	12959	0.533483	0.418377	0.115106	-0.307063
SNX1	Snx1	6642	56440	0.690863	0.511752	0.179111	-0.306974
PPEF1	Ppef1	5475	237178	0.488668	0.363695	0.124973	-0.306933
TMEM63C	Tmem63c	57156	217733	0.479822	0.352268	0.127554	-0.306792
NOS1AP	Nos1ap	9722	70729	0.60821	0.474162	0.134048	-0.306764
CDH13	Cdh13	1012	12554	0.519293	0.402766	0.116527	-0.30672
KRTAP12-1	Gm10100	353332	100502953	0.419806	0.228023	0.191782	-0.306157
TRAPPC1	Trappc1	58485	245828	0.481765	0.35607	0.125695	-0.306121
CD55	Cd55	1604	13136	0.508174	0.390172	0.118002	-0.306018
NT5E	Nt5e	4907	23959	0.584027	0.45901	0.125017	-0.305769
UPK3A	Upk3a	7380	22270	0.47569	0.347044	0.128646	-0.305621
PCDHB6	Pcdhb13	56130	93884	0.586989	0.461183	0.125805	-0.305433
TRPM8	Trpm8	79054	171382	0.633533	0.487973	0.14556	-0.305333
GP1BA	Gp1ba	2811	14723	0.487795	0.363903	0.123892	-0.304762
SNAPC2	Snapc2	6618	102209	0.49058	0.367342	0.123238	-0.304678
ZNF254	Zfp738	9534	408068	0.456505	0.313806	0.1427	-0.304116
CDX4	Cdx4	1046	12592	0.462635	0.326351	0.136284	-0.303882
PPP1R7	Ppp1r7	5510	66385	0.584959	0.460328	0.12463	-0.303608
ZKSCAN3	Zkscan3	80317	72739	0.437583	0.276107	0.161476	-0.303536
HIGD2A	Higd2a	192286	67044	0.544156	0.428966	0.11519	-0.303258
SLCO4C1	Slco4c1	353189	227394	0.539253	0.424644	0.114609	-0.303225
PLA2G2E	Pla2g2e	30814	26970	0.509592	0.393333	0.116259	-0.302994
COX20	Cox20	116228	66359	0.481466	0.357169	0.124297	-0.302931
CLCN5	Clcn5	1184	12728	0.697403	0.515855	0.181548	-0.302616
TMEM88B	Tmem88b	643965	320587	0.635143	0.489849	0.145294	-0.302556
TMED10	Tmed10	10972	68581	0.540253	0.425789	0.114464	-0.302427
VTI1B	Vti1b	10490	53612	0.675588	0.508707	0.16688	-0.302397
GPR50	Gpr50	9248	14765	0.481569	0.357566	0.124004	-0.302364
BRICD5	Bricd5	283870	319259	0.437576	0.277526	0.16005	-0.302203
ADAP2	Adap2	55803	216991	0.480161	0.355952	0.124209	-0.302042
PRMT7	Prmt7	54496	214572	0.461301	0.325162	0.136139	-0.301642
AMMECR1	Ammecr1	9949	56068	0.607	0.475561	0.13144	-0.301494
SUB1	Sub1	10923	20024	0.517679	0.403506	0.114172	-0.301445
LRIF1	Lrif1	55791	321000	0.480889	0.357039	0.12385	-0.301285
PET100	Pet100	100131801	100503890	0.418435	0.229996	0.188439	-0.301168
AP5Z1	Ap5z1	9907	231855	0.635233	0.490475	0.144758	-0.301101
EIF3G	Eif3g	8666	53356	0.50363	0.386534	0.117096	-0.30106
PTP4A1	Ptp4a1	7803	19243	0.595813	0.469157	0.126656	-0.300873
GLYR1	Glyr1	84656	74022	0.538187	0.424711	0.113476	-0.300821
SLC30A8	Slc30a8	169026	239436	0.474195	0.347238	0.126957	-0.300797
GNL3L	Gnl3l	54552	237107	0.732254	0.527203	0.205051	-0.300658
APOL3	Apol10b	80833	328561	0.445877	0.298638	0.147238	-0.299978
C7orf31	4921507P07Rik	136895	70821	0.514498	0.401111	0.113387	-0.299937
KCTD20	Kctd20	222658	66989	0.505964	0.390058	0.115906	-0.299923
CXorf40B	1110012L19Rik	541578	68618	0.44809	0.302979	0.145111	-0.299654
PYGO1	Pygo1	26108	72135	0.705762	0.520217	0.185545	-0.299388
ZNF430	Zfp712	80264	78251	0.465363	0.334408	0.130955	-0.299317
ZNF14	AW146154	7561	101835	0.446201	0.299897	0.146304	-0.299292
MIS18BP1	Mis18bp1	55320	217653	0.529222	0.417912	0.11131	-0.299216
ZBTB33	Zbtb33	10009	56805	0.579278	0.458778	0.1205	-0.299128
MLLT1	Mllt1	4298	64144	0.707514	0.521051	0.186463	-0.298901
NOL10	Nol10	79954	217431	0.566966	0.449724	0.117242	-0.298831
NIPA1	Nipa1	123606	233280	0.580936	0.459962	0.120975	-0.298506
APOL3	Apol9a	80833	223672	0.445877	0.299955	0.145921	-0.298455
BCL10	Bcl10	8915	12042	0.567262	0.450416	0.116846	-0.297998
C17orf98	1700001P01Rik	388381	72215	0.542814	0.429907	0.112907	-0.297936
CBLN2	Cbln2	147381	12405	0.547309	0.434744	0.112565	-0.297533
FGF21	Fgf21	26291	56636	0.457502	0.320125	0.137377	-0.297487
TCEB3	Tceb3	6924	27224	0.616862	0.482095	0.134767	-0.297339
PIP	Pip	5304	18716	0.399843	0.174444	0.2254	-0.297279
RPL12	Rpl12	6136	269261	0.546753	0.434545	0.112209	-0.296962
SSR4	Ssr4	6748	20832	0.468909	0.342556	0.126353	-0.296846
C1QL3	C1ql3	389941	227580	0.551774	0.438582	0.113192	-0.296773
SLC7A3	Slc7a3	84889	11989	0.449635	0.307431	0.142204	-0.296582
GRXCR2	Grxcr2	643226	332309	0.501028	0.3861	0.114927	-0.295712
BAIAP2L1	Baiap2l1	55971	66898	0.589592	0.467678	0.121915	-0.29554
NAIP	Naip1	4671	17940	0.590679	0.468583	0.122096	-0.295377
AFF2	Aff2	2334	14266	0.886654	0.548331	0.338324	-0.294806
NUP85	Nup85	79902	445007	0.572989	0.456455	0.116535	-0.294446
OSGIN2	Osgin2	734	209212	0.495277	0.378852	0.116425	-0.294444
TMEM52B	Tmem52b	120939	330428	0.457054	0.320792	0.136262	-0.29434
GDI1	Gdi1	2664	14567	0.558364	0.44491	0.113454	-0.294238
NDUFS6	Ndufs6	4726	407785	0.625384	0.488535	0.13685	-0.294218
LIX1L	Lix1l	128077	280411	0.568479	0.453216	0.115263	-0.29392
PAX6	Pax6	5080	18508	0.630413	0.491345	0.139068	-0.293769
KLHL28	Klhl28	54813	66689	0.681884	0.514507	0.167376	-0.293596
SNTB2	Sntb2	6645	20650	0.779882	0.538625	0.241257	-0.293551
CALN1	Caln1	83698	140904	0.769585	0.536806	0.232779	-0.293491
MALL	Mall	7851	228576	0.488482	0.370093	0.118389	-0.293308
TLR8	Tlr8	51311	170744	0.512308	0.401606	0.110703	-0.293083
IL21R	Il21r	50615	60504	0.454509	0.317903	0.136607	-0.293072
PCDHB14	Pcdhb20	56122	93891	0.682885	0.515503	0.167382	-0.292929
ZNF273	Zfp273	10793	212569	0.439407	0.290278	0.149129	-0.292842
RPL7A	Rpl7a	6130	27176	0.542638	0.43221	0.110429	-0.292694
ATP6V1C1	Atp6v1c1	528	66335	0.549251	0.438377	0.110873	-0.292668
HAUS3	Haus3	79441	231123	0.481356	0.361779	0.119577	-0.292404
ZNF280D	Zfp280d	54816	235469	0.51204	0.401603	0.110437	-0.292394
SPICE1	Spice1	152185	212514	0.508332	0.397159	0.111174	-0.292164
ABCB8	Abcb8	11194	74610	0.513805	0.4039	0.109905	-0.292103
DSG3	Dsg3	1830	13512	0.551502	0.440388	0.111114	-0.291878
AK3	Ak3	50808	56248	0.482442	0.363724	0.118719	-0.291753
PRL	Prl	5617	19109	0.400504	0.184335	0.216169	-0.29163
BIRC3	Birc3	330	11796	0.557873	0.445603	0.11227	-0.291562
THRB	Thrb	7068	21834	0.668673	0.510811	0.157861	-0.291386
CAPRIN2	Caprin2	65981	232560	0.476127	0.355936	0.120191	-0.291274
CST6	Cst6	1474	73720	0.500988	0.388105	0.112882	-0.291018
CFD	Cfd	1675	11537	0.611105	0.481913	0.129191	-0.290902
PCGF3	Pcgf3	10336	69587	0.603024	0.477736	0.125288	-0.290792
CAMK2N1	Camk2n1	55450	66259	0.673143	0.512586	0.160557	-0.2907
MSANTD1	Msantd1	345222	403174	0.523437	0.415881	0.107556	-0.29048
PNRC2	Pnrc2	55629	52830	0.460775	0.331412	0.129363	-0.290388
ACTR6	Actr6	64431	67019	0.50704	0.396419	0.110622	-0.290156
APOL4	Apol7a	80832	75761	0.45164	0.314675	0.136966	-0.290044
KRTAP2-1	Gm11937	81872	100041488	0.476068	0.356327	0.119741	-0.289933
CTAG2	Gm6880	30848	628456	0.434959	0.281481	0.153478	-0.289818
CASC5	Casc5	57082	76464	0.638532	0.497508	0.141024	-0.289726
CES3	Ces3b	23491	13909	0.439574	0.293943	0.14563	-0.28935
PAX8	Pax8	7849	18510	0.503921	0.392791	0.11113	-0.28903
ZNF784	Zfp784	147808	654801	0.482028	0.364377	0.117651	-0.289017
APPL2	Appl2	55198	216190	0.507792	0.398174	0.109618	-0.288781
RPS13	Rps13	6207	68052	0.683618	0.517572	0.166046	-0.288261
KIAA1143	1110059G10Rik	57456	66202	0.440857	0.297488	0.143369	-0.287853
TFRC	Tfrc	7037	22042	0.575893	0.46116	0.114733	-0.2876
ZNF273	Zfp58	10793	238693	0.439407	0.295176	0.144231	-0.287194
B3GNT7	B3gnt7	93010	227327	0.506579	0.396974	0.109605	-0.287131
HIST1H2BB	Hist1h2br	3018	665622	0.525889	0.419111	0.106778	-0.287026
NAIP	Naip5	4671	17951	0.590679	0.472252	0.118427	-0.286979
FBXL18	Fbxl18	80028	231863	0.771788	0.540148	0.231641	-0.286684
PLXDC1	Plxdc1	57125	72324	0.571175	0.458274	0.112901	-0.286662
SPOPL	Spopl	339745	76857	0.614177	0.485511	0.128666	-0.28658
ATP11B	Atp11b	23200	76295	0.687918	0.519767	0.168151	-0.286406
EXOSC7	Exosc7	23016	66446	0.680078	0.517261	0.162817	-0.286121
RPP38	Rpp38	10557	227522	0.415968	0.238767	0.177201	-0.286102
GABRB1	Gabrb1	2560	14400	0.614863	0.48597	0.128893	-0.286042
PDIA4	Pdia4	9601	12304	0.620526	0.489207	0.131319	-0.286031
LILRB2	Pirb	10288	18733	0.416374	0.240362	0.176012	-0.285937
TBXAS1	Tbxas1	6916	21391	0.427628	0.267318	0.160309	-0.285858
HTATSF1	Htatsf1	27336	72459	0.584613	0.467928	0.116685	-0.285837
CCDC59	Ccdc59	29080	52713	0.525155	0.419009	0.106146	-0.285791
PMPCA	Pmpca	23203	66865	0.590762	0.472784	0.117978	-0.285619
SLC2A6	Slc2a6	11182	227659	0.453584	0.32109	0.132494	-0.285511
TUBB2A	Tubb2a	7280	22151	0.538699	0.432008	0.10669	-0.285413
STRN	Strn	6801	268980	0.904367	0.553643	0.350723	-0.285354
ALPP	Alppl2	250	11650	0.546261	0.438698	0.107563	-0.285348
CHRNA2	Chrna2	1135	110902	0.496458	0.385688	0.110771	-0.285037
SEC14L5	Sec14l5	9717	665119	0.633941	0.49699	0.136951	-0.28488
ZNF14	Etohi1	7561	626848	0.446201	0.309014	0.137188	-0.284805
CLPTM1	Clptm1	1209	56457	0.512211	0.405583	0.106628	-0.284769
CRISPLD1	Crispld1	83690	83691	0.540411	0.434167	0.106244	-0.284124
KCNA5	Kcna5	3741	16493	0.552312	0.444404	0.107908	-0.284088
ZNF716	Zfp72	441234	238722	0.394381	0.172251	0.222131	-0.284052
PPT1	Ppt1	5538	19063	0.418672	0.247915	0.170757	-0.283957
GLIPR1	Glipr1	11010	73690	0.429831	0.274006	0.155824	-0.283916
CXCL5	Cxcl5	6374	20311	0.462215	0.338496	0.12372	-0.283742
MRPL32	Mrpl32	64983	75398	0.399581	0.191709	0.207872	-0.283478
TNFRSF9	Tnfrsf9	3604	21942	0.483465	0.369056	0.114409	-0.283473
SDHA	Sdha	6389	66945	0.531764	0.42659	0.105174	-0.283449
SAMD9L	Samd9l	219285	209086	0.572666	0.460343	0.112322	-0.28341
MS4A13	Ms4a13	503497	73466	0.435696	0.289167	0.146529	-0.283374
TXLNG	Txlng	55787	353170	0.513715	0.407658	0.106058	-0.283231
TESPA1	Tespa1	9840	67596	0.438424	0.296284	0.14214	-0.283076
NLRP9	Nlrp9b	338321	243874	0.488036	0.374697	0.113339	-0.283032
CETN1	Cetn1	1068	26369	0.433654	0.284524	0.14913	-0.283008
CNDP1	Cndp1	84735	338403	0.438025	0.295049	0.142976	-0.282907
IMPAD1	Impad1	54928	242291	0.68274	0.519617	0.163123	-0.282903
DFNA5	Dfna5	1687	54722	0.493672	0.38271	0.110961	-0.282594
GTF3C6	Gtf3c6	112495	67371	0.479744	0.364277	0.115467	-0.282364
FZD4	Fzd4	8322	14366	0.646443	0.504547	0.141896	-0.282304
SLC26A7	Slc26a7	115111	208890	0.5482	0.441929	0.10627	-0.2821
ZNF254	Zfp595	9534	218314	0.456505	0.327909	0.128596	-0.282067
ZNF253	Zfp72	56242	238722	0.393594	0.172251	0.221343	-0.282048
AGPAT4	Agpat4	56895	68262	0.689595	0.522594	0.167001	-0.282018
PGBD5	Pgbd5	79605	209966	0.552961	0.445722	0.10724	-0.281875
OLFML2A	Olfml2a	169611	241327	0.576359	0.463452	0.112907	-0.281871
SLC25A22	Slc25a22	79751	68267	0.478893	0.363729	0.115165	-0.28184
TOR4A	Tor4a	54863	227612	0.670509	0.515637	0.154872	-0.281733
BGLAP	Bglap3	632	12095	0.443729	0.306705	0.137024	-0.281687
ITPK1	Itpk1	3705	217837	0.522532	0.41822	0.104312	-0.281542
OPRK1	Oprk1	4986	18387	0.588365	0.472659	0.115707	-0.28145
IZUMO1	Izumo1	284359	73456	0.636538	0.50005	0.136487	-0.281441
RAPGEF5	Rapgef5	9771	217944	0.604553	0.482478	0.122075	-0.281369
SAMD5	Samd5	389432	320825	0.588506	0.472774	0.115732	-0.28123
2017-09-02	2017-09-02	4735	18000	0.497167	0.388455	0.108712	-0.280892
IL17RA	Il17ra	23765	16172	0.744934	0.538304	0.206631	-0.280882
DUSP15	Dusp15	128853	252864	0.476398	0.361101	0.115296	-0.28075
FSBP	Fsbp	100861412	100503583	0.629341	0.496631	0.13271	-0.280739
EMC3	Emc3	55831	66087	0.478001	0.363251	0.11475	-0.280585
USP51	Usp51	158880	635253	0.535581	0.431718	0.103864	-0.280548
TRPV3	Trpv3	162514	246788	0.661809	0.512578	0.149232	-0.280358
DHDH	Dhdh	27294	71755	0.553615	0.446993	0.106622	-0.280291
KDELC1	Kdelc1	79070	72050	0.569449	0.45937	0.110078	-0.280259
GCA	Gca	25801	227960	0.544405	0.439045	0.10536	-0.280256
PSMG1	Psmg1	8624	56088	0.515336	0.410742	0.104594	-0.280122
ENOX2	Enox2	10495	209224	0.577645	0.465186	0.112459	-0.279796
ISPD	Ispd	729920	75847	0.511651	0.407142	0.104509	-0.279665
KRTAP19-5	Krtap19-1	337972	170657	0.46053	0.337737	0.122793	-0.279266
MMD2	Mmd2	221938	75104	0.440979	0.304562	0.136417	-0.27885
PTK6	Ptk6	5753	20459	0.438637	0.30038	0.138256	-0.278507
RPS6KA6	Rps6ka6	27330	67071	0.700521	0.527571	0.17295	-0.278384
TCTEX1D2	Tctex1d2	255758	66061	0.515649	0.412357	0.103292	-0.27816
BTF3L4	Btf3l4	91408	70533	0.496266	0.388831	0.107435	-0.277778
ASB6	Asb6	140459	72323	0.527696	0.424788	0.102908	-0.277693
SLC25A21	Slc25a21	89874	217593	0.530355	0.427637	0.102718	-0.277677
SLFN11	Slfn8	91607	276950	0.556073	0.450123	0.10595	-0.277597
CNP	Cnp	1267	12799	0.500137	0.394277	0.10586	-0.276887
PPP1CA	Ppp1ca	5499	19045	0.447023	0.31509	0.131933	-0.276882
UBLCP1	Ublcp1	134510	79560	0.481825	0.369908	0.111917	-0.276769
FKTN	Fktn	2218	246179	0.548941	0.444634	0.104306	-0.276565
ARL5B	Arl5b	221079	75869	0.52114	0.418573	0.102566	-0.276558
TMEM129	Tmem129	92305	68366	0.493807	0.386366	0.107442	-0.276039
ADAMTSL2	Adamtsl2	9719	77794	0.647813	0.508635	0.139178	-0.275956
USP53	Usp53	54532	99526	0.663403	0.515543	0.147859	-0.27548
NCAPG	Ncapg	64151	54392	0.571043	0.462578	0.108465	-0.275254
RAB22A	Rab22a	57403	19334	0.78046	0.547726	0.232734	-0.275251
ACTG1	Actg1	71	11465	0.588095	0.474531	0.113564	-0.275067
ERAP1	Erap1	51752	80898	0.479801	0.368078	0.111722	-0.275015
CDK10	Cdk10	8558	234854	0.521752	0.420548	0.101204	-0.274781
NLRP4	Nlrp4b	147945	210045	0.522065	0.420788	0.101277	-0.274625
APOL3	Apol7a	80833	75761	0.445877	0.314675	0.131202	-0.274588
SDF4	Sdf4	51150	20318	0.628201	0.498662	0.129539	-0.274354
IGFALS	Igfals	3483	16005	0.458196	0.336557	0.12164	-0.273948
LCMT1	Lcmt1	51451	30949	0.542995	0.440453	0.102542	-0.273902
MYF6	Myf6	4618	17878	0.580099	0.470133	0.109966	-0.273868
EXOSC9	Exosc9	5393	50911	0.522509	0.421403	0.101106	-0.273821
SRPX	Srpx	8406	51795	0.476326	0.364275	0.112052	-0.273653
MRPL16	Mrpl16	54948	94063	0.529317	0.428482	0.100836	-0.273508
KRTAP6-2	Gm10229	337967	100040201	0.380754	0.139639	0.241115	-0.273469
TMEM9	Tmem9	252839	66241	0.45278	0.327559	0.125221	-0.27335
HEXIM2	Hexim2	124790	71059	0.509038	0.407206	0.101832	-0.273252
WAS	Was	7454	22376	0.431048	0.286487	0.144561	-0.273123
FARP2	Farp2	9855	227377	0.52409	0.42345	0.10064	-0.273028
CCNG2	Ccng2	901	12452	0.56446	0.458663	0.105797	-0.272827
ZNF254	Zfp712	9534	78251	0.456505	0.334408	0.122097	-0.272785
PPP2R2D	Ppp2r2d	55844	52432	0.706758	0.531511	0.175248	-0.272784
RBBP4	Rbbp4	5928	19646	0.63931	0.50561	0.133701	-0.27246
FKBP14	Fkbp14	55033	231997	0.531328	0.431005	0.100323	-0.272432
LIMS1	Lims1	3987	110829	0.583699	0.473097	0.110601	-0.272339
ABCC1	Abcc1	4363	17250	0.676219	0.52189	0.154329	-0.272288
GPR63	Gpr63	81491	81006	0.55784	0.453709	0.104132	-0.272255
FOPNL	Fopnl	123811	66086	0.410275	0.235768	0.174507	-0.272219
RNF151	Rnf151	146310	67504	0.465744	0.350564	0.11518	-0.272089
KCNQ3	Kcnq3	3786	110862	0.818944	0.553813	0.265131	-0.272031
TAF15	Taf15	8148	70439	0.451324	0.32613	0.125194	-0.271944
TNFSF12	Tnfsf12	8742	21944	0.502169	0.399801	0.102368	-0.271502
LSP1	Lsp1	4046	16985	0.465549	0.35065	0.1149	-0.271316
CMTM2	Cmtm2a	146225	73381	0.448917	0.322029	0.126888	-0.271002
NLRP7	Nlrp2	199713	232827	0.471333	0.359128	0.112205	-0.270988
CRELD2	Creld2	79174	76737	0.622687	0.497148	0.125539	-0.270946
GTF2H1	Gtf2h1	2965	14884	0.502765	0.400508	0.102257	-0.27094
TM9SF4	Tm9sf4	9777	99237	0.49686	0.393005	0.103855	-0.270752
HRNR	Hrnr	388697	68723	0.587768	0.475822	0.111946	-0.270744
PRSS27	Prss27	83886	213171	0.448781	0.321927	0.126854	-0.270565
SLC25A24	Slc25a24	29957	229731	0.551665	0.449313	0.102352	-0.270478
GOLGA3	Golga3	2802	269682	0.721173	0.537556	0.183618	-0.270447
ADM	Adm	133	11535	0.597455	0.482394	0.115061	-0.270281
RLTPR	Rltpr	146206	234695	0.63774	0.506132	0.131608	-0.269771
TMEM136	Tmem136	219902	235300	0.461466	0.345305	0.116161	-0.269757
MAL	Mal	4118	17153	0.486497	0.379544	0.106953	-0.269649
SPAG16	Spag16	79582	66722	0.453546	0.331701	0.121845	-0.269533
KRTAP12-1	Gm10024	353332	100009614	0.419806	0.263467	0.156339	-0.269522
ANKH	Ank	56172	11732	0.710858	0.534377	0.176481	-0.269294
ELL	Ell	8178	13716	0.635085	0.504525	0.13056	-0.269109
TMEM236	Tmem236	653567	625286	0.526131	0.426975	0.0991557	-0.268846
UBASH3B	Ubash3b	84959	72828	0.664179	0.518535	0.145644	-0.268792
NLRP5	Nlrp5	126206	23968	0.504735	0.403825	0.100909	-0.268781
WFDC2	Wfdc2	10406	67701	0.495312	0.392336	0.102976	-0.268616
EIF2S1	Eif2s1	1965	13665	0.466045	0.352912	0.113133	-0.268366
KRT86	5430421N21Rik	3892	100126226	0.500203	0.398952	0.101251	-0.268311
WIPI2	Wipi2	26100	74781	0.64869	0.512276	0.136414	-0.268073
NAA25	Naa25	80018	231713	0.647345	0.511462	0.135883	-0.268055
ALPI	Alpi	248	76768	0.453099	0.331899	0.1212	-0.26767
CBR4	Cbr4	84869	234309	0.457019	0.338296	0.118723	-0.267523
VEGFC	Vegfc	7424	22341	0.551196	0.450057	0.101138	-0.267519
ECSIT	Ecsit	51295	26940	0.485352	0.379073	0.10628	-0.267364
KIF9	Kif9	64147	16578	0.4666	0.354876	0.111724	-0.267308
VTA1	Vta1	51534	66201	0.437552	0.30508	0.132471	-0.267283
THOC6	Thoc6	79228	386612	0.517346	0.418599	0.0987472	-0.267281
ACBD7	Acbd7	414149	78245	0.397966	0.205696	0.19227	-0.267259
MAOA	Maoa	4128	17161	0.549176	0.448618	0.100557	-0.267117
TRAPPC2	0610009B22Rik	6399	66050	0.444773	0.317829	0.126944	-0.267004
STAC3	Stac3	246329	237611	0.539357	0.440113	0.0992434	-0.266998
NUP43	Nup43	348995	69912	0.394822	0.196477	0.198345	-0.266917
MFAP2	Mfap2	4237	17150	0.427151	0.283515	0.143635	-0.266875
NCALD	Ncald	83988	52589	0.551678	0.45085	0.100828	-0.2667
C9orf24	1110017D15Rik	84688	73721	0.485821	0.38031	0.105511	-0.266529
UBE2I	Ube2i	7329	22196	0.597543	0.484482	0.113061	-0.266423
RRP7A	Rrp7a	27341	74778	0.588823	0.478567	0.110256	-0.266337
APOA1BP	Apoa1bp	128240	246703	0.473258	0.363478	0.10978	-0.266334
ZNF37A	Zfp157	7587	72154	0.509797	0.411115	0.0986813	-0.266248
ARHGAP1	Arhgap1	392	228359	0.451624	0.330161	0.121463	-0.266166
CT45A5	Gm648	441521	270599	0.439903	0.310282	0.129621	-0.26613
ZCCHC9	Zcchc9	84240	69085	0.458487	0.342453	0.116034	-0.265876
CAST	Cast	831	12380	0.577705	0.472104	0.105601	-0.265323
MPC1	Mpc1	51660	55951	0.448219	0.324761	0.123458	-0.265152
SYT5	Syt5	6861	53420	0.526536	0.428861	0.0976746	-0.264738
CXorf57	D330045A20Rik	55086	102871	0.516487	0.41891	0.0975772	-0.264579
CEP68	Cep68	23177	216543	0.561921	0.460035	0.101887	-0.264547
SLFN11	Slfn9	91607	237886	0.556073	0.455901	0.100172	-0.264485
SLC37A2	Slc37a2	219855	56857	0.515138	0.418059	0.0970797	-0.264193
SRSF7	Srsf7	6432	225027	0.474218	0.36567	0.108548	-0.264173
PSMB2	Psmb2	5690	26445	0.456319	0.339262	0.117057	-0.264144
FGFR1OP2	Fgfr1op2	26127	67529	0.568641	0.46515	0.103491	-0.264126
SRP19	Srp19	6728	66384	0.459746	0.345272	0.114474	-0.264053
ST8SIA4	St8sia4	7903	20452	0.532454	0.43573	0.0967249	-0.264016
CSRP3	Csrp3	8048	13009	0.469159	0.360162	0.108997	-0.263707
C2orf69	1700066M21Rik	205327	73467	0.491696	0.390001	0.101696	-0.263618
TRIP10	Trip10	9322	106628	0.597294	0.485311	0.111983	-0.263591
PRRG4	Prrg4	79056	228413	0.477328	0.370458	0.10687	-0.263191
SLC31A1	Slc31a1	1317	20529	0.483452	0.378703	0.104749	-0.263086
AGPAT5	Agpat5	55326	52123	0.636468	0.508529	0.127939	-0.263014
ANO9	Ano9	338440	71345	0.486922	0.383572	0.103349	-0.262994
TMEM205	Tmem205	374882	235043	0.432078	0.29712	0.134958	-0.262814
SDCCAG3	Sdccag3	10807	68112	0.59753	0.485693	0.111837	-0.262782
GLT8D2	Glt8d2	83468	74782	0.478899	0.373132	0.105767	-0.262596
RAP2C	Rap2c	57826	72065	0.494775	0.394525	0.100251	-0.262523
LSM6	Lsm6	11157	78651	0.528579	0.432744	0.0958342	-0.262479
DNLZ	Dnlz	728489	52838	0.571438	0.468736	0.102701	-0.262453
ATG13	Atg13	9776	51897	0.556083	0.456708	0.0993743	-0.262426
SGPL1	Sgpl1	8879	20397	0.566768	0.464361	0.102407	-0.262356
PVRL3	Pvrl3	25945	58998	0.557178	0.457444	0.0997344	-0.262252
VWCE	Vwce	220001	71768	0.615791	0.496966	0.118824	-0.262248
PNPT1	Pnpt1	87178	71701	0.515754	0.419477	0.0962773	-0.262123
FAM111A	Fam111a	63901	107373	0.426994	0.287032	0.139963	-0.261991
GID8	Gid8	54994	76425	0.589205	0.481321	0.107885	-0.261533
USP40	Usp40	55230	227334	0.609036	0.493884	0.115153	-0.261494
C17orf62	BC017643	79415	217370	0.484079	0.38071	0.103369	-0.261449
ENO3	Eno3	2027	13808	0.475165	0.368719	0.106446	-0.261392
ZSCAN25	Zscan25	221785	666311	0.454768	0.33892	0.115848	-0.261037
OCA2	Oca2	4948	18431	0.444227	0.320697	0.12353	-0.260971
DGKH	Dgkh	160851	380921	0.96185	0.568122	0.393729	-0.26088
MRPL1	Mrpl1	65008	94061	0.470744	0.363431	0.107313	-0.260682
ETV1	Etv1	2115	14009	0.58628	0.479174	0.107106	-0.260293
XAF1	Xaf1	54739	327959	0.469021	0.361477	0.107544	-0.260236
DKK4	Dkk4	27121	234130	0.521513	0.425916	0.0955968	-0.259994
ZNF43	Zfp11	7594	22648	0.489038	0.387609	0.10143	-0.259862
IL1RAPL2	Il1rapl2	26280	60367	0.466385	0.358164	0.108221	-0.259645
CABP4	Cabp4	57010	73660	0.531342	0.436737	0.0946049	-0.259573
CAPZA1	Capza1	829	12340	0.435281	0.305765	0.129515	-0.259549
RAB39B	Rab39b	116442	67790	0.435126	0.305248	0.129878	-0.259456
SREK1	Srek1	140890	218543	0.613246	0.496916	0.11633	-0.259227
ZNF273	Zfp738	10793	408068	0.439407	0.313806	0.125601	-0.258859
RNF17	Rnf17	56163	30054	0.594941	0.48577	0.109171	-0.258833
SLFN12	Slfn3	55106	20557	0.47272	0.366255	0.106465	-0.258827
FUT8	Fut8	2530	53618	0.519661	0.424566	0.0950952	-0.258311
FAM13A	Fam13a	10144	58909	0.574938	0.47306	0.101878	-0.258248
RHOD	Rhod	29984	11854	0.600007	0.489785	0.110222	-0.258176
DDX52	Ddx52	11056	78394	0.603667	0.492051	0.111616	-0.25808
COA3	Coa3	28958	52469	0.589205	0.482525	0.10668	-0.257798
MPG	Mpg	4350	268395	0.4904	0.390736	0.0996641	-0.257679
AMN1	Amn1	196394	232566	0.409188	0.24712	0.162068	-0.257573
YTHDC1	Ythdc1	91746	231386	0.683949	0.530576	0.153373	-0.257489
WDR36	Wdr36	134430	225348	0.603204	0.492179	0.111026	-0.257364
ACAD10	Acad10	80724	71985	0.553301	0.45663	0.096671	-0.257288
ZDHHC2	Zdhhc2	51201	70546	0.459782	0.348984	0.110798	-0.257098
ATP6V1D	Atp6v1d	51382	73834	0.52289	0.428904	0.0939858	-0.257096
KRAS	Kras	3845	16653	0.627558	0.506257	0.121302	-0.257088
AR	Ar	367	11835	0.747587	0.550297	0.197291	-0.256982
TOX	Tox	9760	252838	0.497717	0.401286	0.096431	-0.256878
GNG7	Gng7	2788	14708	0.595307	0.48679	0.108517	-0.256859
PRDM10	Prdm10	56980	382066	0.660217	0.52245	0.137767	-0.256413
CBLL1	Cbll1	79872	104836	0.525498	0.431911	0.0935868	-0.256376
EHF	Ehf	26298	13661	0.525867	0.432148	0.0937194	-0.256227
NHS	Nhs	4810	195727	0.7501	0.551412	0.198687	-0.255979
APBA2	Apba2	321	11784	0.587881	0.48209	0.105791	-0.255977
DSG1	Dsg1a	1828	13510	0.595033	0.487089	0.107944	-0.255954
TERT	Tert	7015	21752	0.598677	0.489787	0.108889	-0.255912
ELL2	Ell2	22936	192657	0.57575	0.474083	0.101667	-0.255889
THG1L	Thg1l	54974	66628	0.528707	0.435629	0.0930782	-0.255818
GTSE1	Gtse1	51512	29870	0.541063	0.446017	0.0950464	-0.255714
TXNDC12	Txndc12	51060	66073	0.422255	0.281309	0.140946	-0.255574
ZSCAN22	Zscan22	342945	232878	0.465243	0.358505	0.106737	-0.255382
RIC8A	Ric8	60626	101489	0.531525	0.438391	0.0931343	-0.255277
GADD45GIP1	Gadd45gip1	90480	102060	0.609804	0.497049	0.112755	-0.25493
COX6A2	Cox6a2	1339	12862	0.524489	0.431852	0.0926371	-0.254874
AZI2	Azi2	64343	27215	0.565428	0.467072	0.0983563	-0.254819
SMAD4	Smad4	4089	17128	0.740052	0.55003	0.190022	-0.254407
TMTC3	Tmtc3	160418	237500	0.650058	0.51869	0.131368	-0.254319
NADK	Nadk	65220	192185	0.478206	0.37608	0.102126	-0.254306
RNF4	Rnf4	6047	19822	0.462783	0.356036	0.106746	-0.25421
TPT1	Tpt1	7178	22070	0.461208	0.353089	0.108119	-0.253939
LAYN	Layn	143903	244864	0.46966	0.365394	0.104266	-0.253678
EPN2	Epn2	22905	13855	0.560585	0.463523	0.0970622	-0.2535
RALYL	Ralyl	138046	76897	0.42525	0.290068	0.135182	-0.252991
CDK17	Cdk17	5128	237459	0.555796	0.460078	0.0957181	-0.252897
IRF8	Irf8	3394	15900	0.556033	0.460286	0.0957471	-0.25279
STX6	Stx6	10228	58244	0.568872	0.470698	0.0981738	-0.25272
CAPN15	Capn15	6650	50817	0.630563	0.509592	0.12097	-0.252679
DDB1	Ddb1	1642	13194	0.573637	0.474095	0.0995411	-0.252678
HIST1H2BH	Hist1h2br	8345	665622	0.511467	0.419111	0.0923559	-0.252528
MCAM	Mcam	4162	84004	0.464601	0.359212	0.105389	-0.252382
TAF1D	Taf1d	79101	75316	0.499561	0.4056	0.0939613	-0.252174
COG6	Cog6	57511	67542	0.561379	0.464534	0.0968449	-0.252156
RBAK	Rbak	57786	57782	0.598767	0.491523	0.107244	-0.252092
NSA2	Nsa2	10412	59050	0.549624	0.455858	0.0937664	-0.251958
NDC1	Ndc1	55706	72787	0.491147	0.39491	0.0962366	-0.251761
AASDHPPT	Aasdhppt	60496	67618	0.500204	0.406498	0.093706	-0.251667
CEP104	Cep104	9731	230967	0.658506	0.523986	0.13452	-0.251464
PPME1	Ppme1	51400	72590	0.548454	0.454645	0.0938097	-0.251395
GLB1L3	Glb1l3	112937	70893	0.445142	0.328239	0.116902	-0.251355
SLC35B4	Slc35b4	84912	58246	0.618073	0.503013	0.11506	-0.251349
OLFML2B	Olfml2b	25903	320078	0.599817	0.492525	0.107292	-0.251307
GNG4	Gng4	2786	14706	0.51474	0.423095	0.0916442	-0.251008
GJD4	Gjd4	219770	225152	0.454141	0.344009	0.110132	-0.250917
COMTD1	Comtd1	118881	69156	0.604451	0.495782	0.108669	-0.250858
LYSMD4	Lysmd4	145748	75099	0.424117	0.289672	0.134445	-0.250676
UNC93B1	Unc93b1	81622	54445	0.615616	0.501947	0.113669	-0.250647
SFRP4	Sfrp4	6424	20379	0.543499	0.450576	0.0929229	-0.250557
ZNF800	Zfp800	168850	627049	0.603215	0.495092	0.108123	-0.250545
EEF2	Eef2	1938	13629	0.628168	0.509447	0.11872	-0.250386
ZNF786	Zfp786	136051	330301	0.52606	0.435091	0.0909696	-0.250322
MCAT	Mcat	27349	223722	0.526712	0.435808	0.090904	-0.249887
MGST1	Mgst1	4257	56615	0.429072	0.301057	0.128015	-0.249821
ACTR3	Actr3	10096	74117	0.613481	0.501163	0.112317	-0.249676
ACTR3B	Actr3b	57180	242894	0.546826	0.453974	0.0928518	-0.249534
SPIN4	Spin4	139886	270624	0.618126	0.504088	0.114038	-0.249301
COL20A1	Col20a1	57642	73368	0.565925	0.469822	0.0961024	-0.249124
MRPL19	Mrpl19	9801	56284	0.678506	0.532004	0.146502	-0.249111
MAPK1IP1L	Mapk1ip1l	93487	218975	0.601832	0.494645	0.107187	-0.249059
GAL3ST2	Gm9994	64090	100041596	0.529954	0.439497	0.0904571	-0.248765
H3F3B	H3f3b	3021	15081	0.528896	0.438612	0.0902848	-0.248674
SLC30A6	Slc30a6	55676	210148	0.540145	0.448224	0.0919212	-0.248484
TSPYL2	Tspyl2	64061	52808	0.563302	0.468165	0.0951375	-0.248474
RHBDD1	Rhbdd1	84236	76867	0.498707	0.40633	0.0923774	-0.248353
SKIV2L2	Skiv2l2	23517	72198	0.602915	0.496055	0.10686	-0.248095
AREG	Areg	374	11839	0.494324	0.401116	0.0932072	-0.248089
CARD14	Card14	79092	170720	0.544564	0.452826	0.0917388	-0.247911
CT45A1	Gm648	541466	270599	0.433755	0.310282	0.123473	-0.247827
LPCAT1	Lpcat1	79888	210992	0.625451	0.509273	0.116178	-0.247719
HIST1H2BO	Hist1h2br	8348	665622	0.509403	0.419111	0.0902919	-0.247623
LRFN2	Lrfn2	57497	70530	0.55713	0.46307	0.0940599	-0.247599
VSNL1	Vsnl1	7447	26950	0.524232	0.434656	0.0895755	-0.247566
DDI1	Ddi1	414301	71829	0.4013	0.23464	0.16666	-0.2474
CHRFAM7A	Chrna7	89832	11441	0.539518	0.448239	0.0912787	-0.247123
OCLN	Ocln	100506658	18260	0.588908	0.486828	0.10208	-0.247003
NONO	Nono	4841	53610	0.576297	0.478202	0.0980951	-0.246744
ITGA2	Itga2	3673	16398	0.651074	0.522797	0.128277	-0.246633
OSTF1	Ostf1	26578	20409	0.5447	0.453521	0.0911784	-0.246418
HNRNPH2	Hnrnph2	3188	56258	0.47156	0.371566	0.0999941	-0.246319
MCM4	Mcm4	4173	17217	0.635443	0.51474	0.120703	-0.246317
ALDH6A1	Aldh6a1	4329	104776	0.473564	0.373632	0.0999319	-0.246264
CHMP2A	Chmp2a	27243	68953	0.506603	0.41659	0.090013	-0.246231
RENBP	Renbp	5973	19703	0.518693	0.42875	0.0899432	-0.246141
CERS2	Cers2	29956	76893	0.440077	0.323261	0.116816	-0.246119
MTR	Mtr	4548	238505	0.837033	0.569377	0.267657	-0.245859
GDPD3	Gdpd3	79153	68616	0.446809	0.335403	0.111406	-0.245816
C11orf88	4833427G06Rik	399949	235345	0.463564	0.360957	0.102607	-0.245794
LIMS2	Lims2	55679	225341	0.484722	0.389612	0.0951097	-0.245534
CATSPERG	Catsperg2	57828	76718	0.604854	0.498579	0.106275	-0.245419
TAF11	Taf11	6882	68776	0.460765	0.357319	0.103446	-0.245345
NOP10	Nop10	55505	66181	0.615335	0.504288	0.111047	-0.245171
ASB1	Asb1	51665	65247	0.653289	0.524478	0.128811	-0.245052
GRID1	Grid1	2894	14803	0.608855	0.500826	0.108029	-0.244885
TBPL2	Tbpl2	387332	227606	0.425623	0.297934	0.127689	-0.244576
LRRN4	Lrrn4	164312	320974	0.541524	0.451126	0.0903983	-0.244231
DUSP22	Dusp22	56940	105352	0.494708	0.403467	0.0912411	-0.244097
KCTD15	Kctd15	79047	233107	0.545274	0.455163	0.0901114	-0.243993
TSN	Tsn	7247	22099	0.518705	0.429709	0.088996	-0.243837
HOXC10	Hoxc10	3226	209448	0.683323	0.537222	0.146101	-0.243747
TOLLIP	Tollip	54472	54473	0.548628	0.458297	0.0903314	-0.243675
NOXA1	Noxa1	10811	241275	0.474093	0.375317	0.0987756	-0.243553
SERPINB6	Serpinb6a	5269	20719	0.458793	0.355085	0.103708	-0.243431
B3GNT5	B3gnt5	84002	108105	0.527156	0.438952	0.0882039	-0.243303
GRM3	Grm3	2913	108069	0.54477	0.455273	0.089497	-0.2429
BSPH1	Bsph1	100131137	330470	0.403015	0.244238	0.158777	-0.242891
CCDC152	Ccdc152	100129792	100039139	0.406994	0.253871	0.153123	-0.242768
APOL4	Apol7e	80832	666348	0.45164	0.345109	0.106531	-0.242506
TATDN2	Tatdn2	9797	381801	0.527688	0.439747	0.0879412	-0.242479
SLC25A31	Slc25a31	83447	73333	0.540832	0.451338	0.0894936	-0.242471
NTPCR	Ntpcr	84284	66566	0.518359	0.430171	0.0881886	-0.242309
PNCK	Pnck	139728	93843	0.497733	0.408024	0.0897088	-0.242296
PNMA1	Pnma1	9240	70481	0.64775	0.523215	0.124535	-0.242264
TMEM242	Tmem242	729515	70544	0.53442	0.446428	0.0879924	-0.242181
SMOC2	Smoc2	64094	64074	0.499217	0.409817	0.0893996	-0.241751
PLEKHA1	Plekha1	59338	101476	0.501825	0.413134	0.0886908	-0.241733
MGAT1	Mgat1	4245	17308	0.502804	0.414042	0.0887625	-0.241727
LRRC14B	Lrrc14b	389257	432779	0.532523	0.444868	0.0876548	-0.241641
ZNF672	Zfp672	79894	319475	0.576562	0.480877	0.0956845	-0.241473
VSTM2B	Vstm2b	342865	58188	0.744423	0.557965	0.186458	-0.240647
HAGHL	Haghl	84264	68977	0.678955	0.536811	0.142143	-0.24064
MRGPRX2	Mrgprx1	117194	404242	0.37819	0.174671	0.203519	-0.240224
BIRC2	Birc2	329	11797	0.460645	0.359296	0.101349	-0.240106
C19orf12	1600014C10Rik	83636	72244	0.540096	0.451807	0.0882889	-0.239924
GBP1	Gbp2b	2633	14468	0.413873	0.274466	0.139406	-0.239866
CIB2	Cib2	10518	56506	0.417046	0.283791	0.133255	-0.239569
CNFN	Cnfn	84518	72383	0.536236	0.448784	0.0874517	-0.239449
HAUS5	Haus5	23354	71909	0.461963	0.361767	0.100197	-0.239381
TMEM39A	Tmem39a	55254	67846	0.46675	0.36848	0.09827	-0.23936
GGCX	Ggcx	2677	56316	0.623863	0.511951	0.111912	-0.23932
SYAP1	Syap1	94056	67043	0.466709	0.368587	0.0981217	-0.239159
HSP90B1	Hsp90b1	7184	22027	0.508065	0.421126	0.0869389	-0.239054
SLC6A18	Slc6a18	348932	22598	0.446471	0.338688	0.107783	-0.238925
MAP2K2	Map2k2	5605	26396	0.607493	0.502944	0.104549	-0.238833
IVD	Ivd	3712	56357	0.535414	0.448548	0.0868664	-0.238671
MS4A2	Ms4a2	2206	14126	0.437689	0.323303	0.114386	-0.238636
KRTAP6-2	Gm10228	337967	100040214	0.380754	0.184976	0.195778	-0.238602
EOGT	Eogt	285203	101351	0.523357	0.437659	0.0856979	-0.23855
APOL4	Apol7b	80832	278679	0.45164	0.34725	0.104391	-0.238136
TTLL2	Ttll2	83887	100216474	0.429839	0.309734	0.120105	-0.238055
SSR3	Ssr3	6747	67437	0.470325	0.374236	0.0960894	-0.23749
CDHR2	Cdhr2	54825	268663	0.554404	0.465685	0.0887187	-0.23729
TRAF7	Traf7	84231	224619	0.495568	0.407715	0.0878528	-0.237189
ACTA1	Acta1	58	11459	0.726423	0.554807	0.171615	-0.237128
CORO1B	Coro1b	57175	23789	0.495197	0.407176	0.0880207	-0.237112
MOSPD2	Mospd2	158747	76763	0.456367	0.354684	0.101682	-0.237058
NUDT21	Nudt21	11051	68219	0.482349	0.390889	0.0914599	-0.236971
ZNF273	Zfp595	10793	218314	0.439407	0.327909	0.111498	-0.236809
AP4M1	Ap4m1	9179	11781	0.469165	0.373127	0.0960375	-0.236799
MTMR6	Mtmr6	9107	219135	0.543948	0.457021	0.0869271	-0.236733
CCNF	Ccnf	899	12449	0.568839	0.476987	0.0918521	-0.23656
CHEK1	Chek1	1111	12649	0.487226	0.397345	0.0898815	-0.236009
HSBP1L1	Hsbp1l1	440498	66255	0.493492	0.405755	0.0877371	-0.235912
PPIL2	Ppil2	23759	66053	0.479778	0.387621	0.0921563	-0.235865
GTF2F1	Gtf2f1	2962	98053	0.658951	0.530259	0.128692	-0.235673
ERBB4	Erbb4	2066	13869	0.871707	0.578359	0.293347	-0.235434
CT45A3	Gm648	441519	270599	0.429291	0.310282	0.119009	-0.235378
SLC5A12	Slc5a12	159963	241612	0.527681	0.442842	0.0848386	-0.235305
ZNHIT6	Znhit6	54680	229937	0.630703	0.517207	0.113496	-0.235208
SLC25A18	Slc25a18	83733	71803	0.425274	0.304376	0.120898	-0.234828
MSANTD4	Msantd4	84437	78100	0.536604	0.451103	0.0855012	-0.234771
TMEM8C	Tmem8c	389827	66139	0.459653	0.360303	0.09935	-0.234664
MOS	Mos	4342	17451	0.573457	0.481507	0.0919494	-0.234525
CDH8	Cdh8	1006	12564	0.643233	0.52408	0.119154	-0.234444
DEAF1	Deaf1	10522	54006	0.813331	0.572763	0.240568	-0.23416
CALR	Calr	811	12317	0.475446	0.382616	0.0928301	-0.233844
CD37	Cd37	951	12493	0.535351	0.450689	0.0846614	-0.233749
OSBPL10	Osbpl10	114884	74486	0.511041	0.426659	0.0843822	-0.233672
MICAL3	Mical3	57553	194401	0.723354	0.55582	0.167534	-0.233559
CDK11A	Cdk11b	728642	12537	0.595699	0.497413	0.0982861	-0.233482
KIAA1919	AI317395	91749	215929	0.516303	0.432061	0.084242	-0.23332
OR2T8	Olfr314	343172	257917	0.422001	0.299151	0.122851	-0.233098
DNAJC21	Dnajc21	134218	78244	0.648135	0.527276	0.120859	-0.233
LTF	Ltf	4057	17002	0.530247	0.446262	0.0839855	-0.23297
LGALS1	Lgals1	3956	16852	0.387911	0.211516	0.176395	-0.232919
NCAPH	Ncaph	23397	215387	0.607351	0.505471	0.10188	-0.232768
ZNF764	E430018J23Rik	92595	101604	0.539043	0.454085	0.0849583	-0.23268
IZUMO3	Izumo3	100129669	69314	0.420801	0.296849	0.123951	-0.232616
CD1D	Cd1d1	912	12479	0.451937	0.350765	0.101172	-0.232399
ZNF770	Zfp770	54989	228491	0.516036	0.432202	0.0838341	-0.232396
NXPH1	Nxph1	30010	18231	0.406373	0.261347	0.145026	-0.232375
PRR19	Prr19	284338	623131	0.399959	0.245777	0.154182	-0.232187
MTMR2	Mtmr2	8898	77116	0.516427	0.432752	0.083675	-0.232156
G0S2	G0s2	50486	14373	0.53246	0.448622	0.0838379	-0.232148
IVNS1ABP	Ivns1abp	10625	117198	0.582305	0.489007	0.0932976	-0.232033
FKBP6	Fkbp6	8468	94244	0.490673	0.403941	0.0867326	-0.231672
ANKRD37	Ankrd37	353322	654824	0.446346	0.343179	0.103167	-0.231544
NEK5	Nek5	341676	330721	0.430187	0.31439	0.115797	-0.231446
DUOX2	Duox2	50506	214593	0.672472	0.538194	0.134278	-0.231344
ACKR3	Ackr3	57007	12778	0.428487	0.311537	0.11695	-0.231331
SLC5A2	Slc5a2	6524	246787	0.523818	0.440903	0.0829145	-0.231253
USP13	Usp13	8975	72607	0.712794	0.553478	0.159315	-0.231171
ACOT9	Acot9	23597	56360	0.441319	0.335639	0.10568	-0.23117
ATP4A	Atp4a	495	11944	0.675588	0.53956	0.136028	-0.230997
C9orf116	1700007K13Rik	138162	69327	0.395778	0.235431	0.160347	-0.230719
KIAA0141	0610009O20Rik	9812	66839	0.460262	0.363261	0.0970006	-0.230692
SULT2A1	Sult2a3	6822	629203	0.376375	0.180878	0.195497	-0.230506
COX5B	Cox5b	1329	12859	0.520785	0.437829	0.082956	-0.230463
ART5	Art5	116969	11875	0.441609	0.336453	0.105157	-0.230303
RAB18	Rab18	22931	19330	0.494617	0.409697	0.0849201	-0.230177
TRPA1	Trpa1	8989	277328	0.513667	0.43074	0.0829274	-0.22999
DNASE1	Dnase1	1773	13419	0.402974	0.255199	0.147775	-0.229968
CTAG1B	Gm6880	1485	628456	0.412893	0.281481	0.131412	-0.229844
TMEM117	Tmem117	84216	320709	0.542322	0.458062	0.08426	-0.229823
C19orf44	1700030K09Rik	84167	72254	0.494365	0.409751	0.0846135	-0.229348
KRTAP19-5	Krtap19-4	337972	170654	0.46053	0.364158	0.0963726	-0.229323
TBC1D14	Tbc1d14	57533	100855	0.637588	0.523913	0.113676	-0.229253
DCPS	Dcps	28960	69305	0.458018	0.360541	0.0974764	-0.229204
MICALL2	Micall2	79778	231830	0.577782	0.486751	0.0910306	-0.229092
DCAF12L1	Dcaf12l1	139170	245404	0.597658	0.50056	0.0970975	-0.229066
ZNF92	Zfp457	168374	431706	0.399667	0.247792	0.151875	-0.229042
DNAL1	Dnal1	83544	105000	0.64887	0.529133	0.119737	-0.228955
PCDHB16	Pcdhb17	57717	93888	0.599457	0.502191	0.0972665	-0.228586
GBP1	Gbp2	2633	14469	0.413873	0.284889	0.128984	-0.228521
TSPAN11	Tspan11	441631	68498	0.483978	0.396913	0.087065	-0.228521
MANEA	Manea	79694	242362	0.553004	0.468297	0.0847061	-0.228501
PHKA2	Phka2	5256	110094	0.681506	0.544103	0.137403	-0.228211
MMRN1	Mmrn1	22915	70945	0.481998	0.394763	0.0872357	-0.228059
PSMA8	Psma8	143471	73677	0.457576	0.360872	0.0967041	-0.227725
VPS72	Vps72	6944	21427	0.504862	0.42239	0.0824719	-0.22759
ZNF273	Zfp712	10793	78251	0.439407	0.334408	0.104999	-0.227527
CTC1	Ctc1	80169	68964	0.694584	0.548854	0.14573	-0.227527
GEMIN7	Gemin7	79760	69731	0.458082	0.361364	0.0967181	-0.227511
STAM	Stam	8027	20844	0.505113	0.422616	0.0824963	-0.227493
NUDT6	Nudt6	11162	229228	0.487569	0.40206	0.0855087	-0.227368
ZNF92	Zfp458	168374	238690	0.399667	0.249669	0.149998	-0.227127
APOL3	Apol7e	80833	666348	0.445877	0.345109	0.100768	-0.227051
TMEM143	Tmem143	55260	70209	0.466501	0.373999	0.0925017	-0.227024
SIAH3	Siah3	283514	380918	0.369233	0.165424	0.203809	-0.22692
CYP11A1	Cyp11a1	1583	13070	0.427287	0.312363	0.114924	-0.226873
HOXC6	Hoxc6	3223	15425	0.605479	0.507364	0.0981156	-0.226813
SLC25A14	Slc25a14	9016	20523	0.570224	0.482185	0.0880394	-0.226569
PAX9	Pax9	5083	18511	0.596007	0.50057	0.0954365	-0.226538
TBC1D20	Tbc1d20	128637	67231	0.461422	0.366918	0.0945043	-0.22644
ZC3H12B	Zc3h12b	340554	547176	0.663302	0.536911	0.126392	-0.226308
GNG5	Gng5	2787	14707	0.474203	0.384884	0.0893189	-0.226303
ECT2L	Ect2l	345930	100045792	0.510106	0.428719	0.0813869	-0.226297
ZNF92	Zfp708	168374	432769	0.399667	0.250518	0.149149	-0.225997
CHML	Chml	1122	12663	0.663359	0.537232	0.126127	-0.225869
APOL2	Apol11a	23780	626615	0.403378	0.260324	0.143054	-0.225867
CD109	Cd109	135228	235505	0.719839	0.558588	0.161251	-0.225818
KCND1	Kcnd1	3750	16506	0.529175	0.448114	0.0810611	-0.225791
FAM216A	Fam216a	29902	68948	0.450237	0.351594	0.0986427	-0.225764
NAP1L1	Nap1l1	4673	53605	0.59862	0.503001	0.095619	-0.225657
GREM2	Grem2	64388	23893	0.518218	0.437542	0.0806757	-0.225496
CCDC12	Ccdc12	151903	72654	0.463447	0.37086	0.0925873	-0.225238
DGCR14	Dgcr14	8220	27886	0.625672	0.519205	0.106467	-0.225151
DSG4	Dsg4	147409	16769	0.508103	0.426959	0.081144	-0.225115
SULT2A1	Sult2a4	6822	434121	0.376375	0.188138	0.188237	-0.225055
ODF2L	Odf2l	57489	52184	0.52675	0.445939	0.0808109	-0.225
ICA1	Ica1	3382	15893	0.456836	0.361029	0.0958066	-0.224871
HSPA5	Hspa5	3309	14828	0.541027	0.45879	0.0822373	-0.224866
EMD	Emd	2010	13726	0.51304	0.432682	0.080358	-0.224598
LRRC25	Lrrc25	126364	211228	0.398459	0.249743	0.148716	-0.224448
STX1A	Stx1a	6804	20907	0.470703	0.380954	0.0897489	-0.224433
RIMKLA	Rimkla	284716	194237	0.802436	0.577117	0.225319	-0.224355
PON3	Pon3	5446	269823	0.461745	0.368677	0.0930675	-0.224141
KCNH8	Kcnh8	131096	211468	0.494443	0.412492	0.0819511	-0.223907
SLC36A2	Slc36a2	153201	246049	0.419753	0.301594	0.11816	-0.223837
CTSD	Ctsd	1509	13033	0.518668	0.438396	0.0802716	-0.223737
C1R	C1rb	715	667277	0.415917	0.294009	0.121908	-0.223527
ACSL6	Acsl6	23305	216739	0.565606	0.47986	0.0857457	-0.223411
CGB	Lhb	1082	16866	0.377515	0.194609	0.182906	-0.223347
WDR5B	Wdr5b	54554	69544	0.464641	0.373428	0.0912132	-0.223184
RANBP3	Ranbp3	8498	71810	0.592907	0.500255	0.0926521	-0.223145
ITGAX	Itgax	3687	16411	0.48273	0.398625	0.0841046	-0.223048
SPATA3	Spata3	130560	70060	0.402267	0.260015	0.142251	-0.222986
FAM19A5	Fam19a5	25817	106014	0.607216	0.509916	0.0973001	-0.222939
C9	C9	735	12279	0.448202	0.350078	0.098124	-0.222866
LONP1	Lonp1	9361	74142	0.637432	0.526745	0.110687	-0.222805
APOL3	Apol7b	80833	278679	0.445877	0.34725	0.0986268	-0.222681
RNH1	Rnh1	6050	107702	0.42022	0.303612	0.116608	-0.222594
ING5	Ing5	84289	66262	0.688904	0.549231	0.139673	-0.222465
CNGB3	Cngb3	54714	30952	0.525918	0.446202	0.0797167	-0.22241
HINT3	Hint3	135114	66847	0.414169	0.290893	0.123276	-0.222263
C3orf17	BC027231	25871	212547	0.445338	0.346685	0.0986531	-0.222126
FBXO7	Fbxo7	25793	69754	0.450444	0.354129	0.0963148	-0.22197
IRAK3	Irak3	11213	73914	0.66536	0.539809	0.125551	-0.221904
NDUFA11	Ndufa11	126328	69875	0.537015	0.457133	0.0798817	-0.221876
PLIN3	Plin3	10226	66905	0.449863	0.353169	0.0966944	-0.221773
XKR9	Xkr9	389668	381246	0.406586	0.270652	0.135934	-0.221773
BTG3	Btg3	10950	12228	0.501394	0.421351	0.0800427	-0.221725
LRCOL1	Lrcol1	100507055	381667	0.436384	0.332088	0.104296	-0.221639
FAM71F2	Fam71f2	346653	245884	0.416912	0.29805	0.118862	-0.221479
AZGP1	Azgp1	563	12007	0.37463	0.188681	0.185949	-0.221444
COX15	Cox15	1355	226139	0.628648	0.522532	0.106116	-0.221403
SIN3B	Sin3b	23309	20467	0.681739	0.547145	0.134594	-0.221346
PRPF38A	Prpf38a	84950	230596	0.482254	0.398758	0.0834959	-0.221329
LAMP2	Lamp2	3920	16784	0.486507	0.403946	0.0825607	-0.221182
TBRG1	Tbrg1	84897	21376	0.506201	0.426238	0.0799631	-0.221162
ERP44	Erp44	23071	76299	0.517921	0.438898	0.0790227	-0.220761
RPL38	Rpl38	6169	67671	0.607778	0.511168	0.0966105	-0.220636
APMAP	Apmap	57136	71881	0.472203	0.385054	0.0871488	-0.220601
ZFYVE28	Zfyve28	57732	231125	0.524218	0.445496	0.0787224	-0.220594
ABCD1	Abcd1	215	11666	0.562014	0.478438	0.0835764	-0.220413
MPV17L	Mpv17l	255027	93734	0.496254	0.416476	0.0797772	-0.220363
HAO2	Hao2	51179	56185	0.387303	0.222749	0.164554	-0.22029
TOM1L2	Tom1l2	146691	216810	0.526732	0.447637	0.0790952	-0.22018
MESP2	Mesp2	145873	17293	0.567377	0.482748	0.0846295	-0.220179
HLA-F	Gm7030	3134	630294	0.460221	0.368302	0.0919191	-0.219972
EIF1AX	Eif1a	1964	13664	0.530604	0.452116	0.0784878	-0.219913
CA4	Car4	762	12351	0.463505	0.373398	0.0901068	-0.219745
CYP4F11	Cyp4f40	57834	631304	0.421624	0.307111	0.114514	-0.219703
ALG13	Alg13	79868	67574	0.456661	0.363376	0.0932855	-0.219528
ALDH3B1	Aldh3b2	221	621603	0.461861	0.371454	0.0904068	-0.219354
KLB	Klb	152831	83379	0.636125	0.527267	0.108858	-0.219335
ABCE1	Abce1	6059	24015	0.604398	0.509814	0.0945837	-0.219326
ACOXL	Acoxl	55289	74121	0.593845	0.502485	0.0913598	-0.219251
CDC42EP3	Cdc42ep3	10602	260409	0.575753	0.489582	0.0861713	-0.219212
VASN	Vasn	114990	246154	0.550199	0.470039	0.0801597	-0.218939
GLIS3	Glis3	169792	226075	0.650806	0.53404	0.116766	-0.218823
LSM1	Lsm1	27257	67207	0.424911	0.313234	0.111677	-0.218753
ERVFRD-1	Synb	405754	239167	0.469839	0.382987	0.0868519	-0.218651
ANKRD22	Ankrd22	118932	52024	0.413751	0.292262	0.121489	-0.2186
IRF7	Irf7	3665	54123	0.520111	0.442044	0.0780664	-0.218557
C18orf25	8030462N17Rik	147339	212163	0.530476	0.452768	0.0777079	-0.218467
SGSH	Sgsh	6448	27029	0.582212	0.494669	0.0875437	-0.218427
SPATA31D3	Spata31d1c	389762	238683	0.39369	0.242491	0.151199	-0.218285
TCF19	Tcf19	6941	106795	0.442464	0.344878	0.0975858	-0.218213
ZBTB21	Zbtb21	49854	114565	0.690751	0.551988	0.138763	-0.218174
GPR26	Gpr26	2849	233919	0.757605	0.572442	0.185163	-0.218134
HIST1H2BM	Hist1h2br	8342	665622	0.498081	0.419111	0.0789701	-0.218084
SIGLEC12	Siglece	89858	83382	0.418758	0.304233	0.114524	-0.218029
SPATA17	Spata17	128153	74717	0.492046	0.412308	0.0797382	-0.217918
HSBP1	Hsbp1	3281	68196	0.418641	0.304168	0.114473	-0.217902
MYO3A	Myo3a	53904	667663	0.628473	0.523864	0.104609	-0.217799
FXR1	Fxr1	8087	14359	0.747608	0.570149	0.177459	-0.217748
CCDC90B	Ccdc90b	60492	66365	0.494354	0.415171	0.0791836	-0.217652
SIGLEC10	Siglecg	89790	243958	0.406777	0.275652	0.131126	-0.217471
KRTAP6-2	Krtap6-5	337967	68484	0.380754	0.209226	0.171528	-0.217436
CEL	Cel	1056	12613	0.437649	0.337193	0.100456	-0.217365
RASEF	Rasef	158158	242505	0.618241	0.518254	0.0999875	-0.217353
CCDC122	Ccdc122	160857	108811	0.432967	0.328216	0.104751	-0.217328
TBC1D15	Tbc1d15	64786	66687	0.543199	0.463971	0.0792278	-0.217071
PVR	Pvr	5817	52118	0.527959	0.450845	0.0771144	-0.217057
TMEM161A	Tmem161a	54929	234371	0.486316	0.405726	0.08059	-0.216964
CLEC1B	Clec1b	51266	56760	0.385496	0.221078	0.164417	-0.216933
FAM84A	Fam84a	151354	105005	0.69204	0.552791	0.13925	-0.216914
PPP4C	Ppp4c	5531	56420	0.551146	0.471556	0.0795907	-0.216884
IDUA	Idua	3425	15932	0.608207	0.513193	0.0950139	-0.216744
ADAMTS6	Adamts6	11174	108154	0.661776	0.540304	0.121472	-0.216608
TLR7	Tlr7	51284	170743	0.455235	0.363062	0.092173	-0.216568
CD200R1	Cd200r4	131450	239849	0.399457	0.258158	0.141299	-0.216472
SLC15A3	Slc15a3	51296	65221	0.481544	0.399954	0.0815898	-0.216469
GADL1	Gadl1	339896	73748	0.483385	0.402167	0.0812173	-0.216467
ENY2	Eny2	56943	223527	0.426792	0.318252	0.10854	-0.216455
PCDHB7	Pcdhb15	56129	93886	0.578902	0.493595	0.0853068	-0.216438
CACNG3	Cacng3	10368	54376	0.538266	0.460224	0.0780415	-0.216319
HIST1H2BD	Hist1h2br	3017	665622	0.497187	0.419111	0.0780755	-0.216132
LSS	Lss	4047	16987	0.532089	0.455499	0.0765899	-0.215971
POU5F2	Pou5f2	134187	75507	0.478256	0.395761	0.0824953	-0.215865
BATF	Batf	10538	53314	0.403152	0.268575	0.134577	-0.215801
SULT2A1	Sult2a5	6822	434264	0.376375	0.199934	0.176442	-0.215773
RASD2	Rasd2	23551	75141	0.47355	0.388894	0.0846568	-0.215761
KIAA0753	4933427D14Rik	9851	74477	0.507031	0.429643	0.0773878	-0.215553
MTNR1A	Mtnr1a	4543	17773	0.406601	0.276902	0.129699	-0.215543
MGAT5	Mgat5	4249	107895	0.661657	0.540919	0.120738	-0.215369
CHAF1A	Chaf1a	10036	27221	0.622903	0.521839	0.101064	-0.215313
TUT1	Tut1	64852	70044	0.520464	0.443652	0.0768125	-0.21529
IL20	Il20	50604	58181	0.379333	0.208098	0.171236	-0.215281
ZNF445	Zfp445	353274	235682	0.727154	0.56659	0.160564	-0.214956
CLPP	Clpp	8192	53895	0.565844	0.483644	0.0822	-0.214881
NCK1	Nck1	4690	17973	0.496092	0.418298	0.0777939	-0.214584
APOL2	Apol7c	23780	108956	0.403378	0.269934	0.133445	-0.214572
BRINP1	Brinp1	1620	56710	0.569512	0.486931	0.0825817	-0.214324
ASAH1	Asah1	427	11886	0.411544	0.291122	0.120422	-0.213894
BCS1L	Bcs1l	617	66821	0.421828	0.311354	0.110474	-0.213861
ANGPTL3	Angptl3	27329	30924	0.394465	0.248294	0.146171	-0.213792
UPB1	Upb1	51733	103149	0.478597	0.397049	0.0815475	-0.213762
SPNS3	Spns3	201305	77577	0.411132	0.289957	0.121176	-0.213739
GSTA3	Gsta1	2940	14857	0.401807	0.266624	0.135183	-0.213686
NUBPL	Nubpl	80224	76826	0.423918	0.314578	0.10934	-0.213639
BLOC1S2	Bloc1s2	282991	73689	0.435526	0.335943	0.0995832	-0.213502
GNAT1	Gnat1	2779	14685	0.484257	0.404762	0.0794952	-0.213401
SPNS2	Spns2	124976	216892	0.50976	0.434193	0.0755669	-0.21335
CRTC1	Crtc1	23373	382056	0.716724	0.564121	0.152603	-0.21313
RUVBL2	Ruvbl2	10856	20174	0.538931	0.461987	0.0769442	-0.212954
KCMF1	Kcmf1	56888	74287	0.70381	0.55976	0.14405	-0.212904
KBTBD12	Kbtbd12	166348	74589	0.488894	0.410086	0.0788081	-0.212786
SAP18	Sap18	10284	20220	0.555507	0.476605	0.0789016	-0.212346
ADAT2	Adat2	134637	66757	0.673199	0.54775	0.125449	-0.212277
SAMD3	Samd3	154075	268288	0.448791	0.356972	0.0918188	-0.212032
HFM1	Hfm1	164045	330149	0.510046	0.435171	0.0748744	-0.211985
EEPD1	Eepd1	80820	67484	0.530664	0.455895	0.0747697	-0.211677
HSPH1	Hsph1	10808	15505	0.566921	0.486172	0.0807486	-0.211067
RBM12	Rbm12	10137	75710	0.640526	0.532352	0.108174	-0.210765
KRTAP13-4	Krtap13-1	284827	268905	0.374512	0.201776	0.172737	-0.210622
TAF1C	Taf1c	9013	21341	0.543907	0.467889	0.0760185	-0.210603
C11orf84	AI846148	144097	68229	0.571349	0.490214	0.0811356	-0.210376
ARHGAP29	Arhgap29	9411	214137	0.726232	0.568428	0.157804	-0.210349
CDH6	Cdh6	1004	12563	0.750807	0.575397	0.17541	-0.210182
RNASEH1	Rnaseh1	246243	19819	0.504557	0.428997	0.0755603	-0.210165
CCZ1B	Ccz1	221960	231874	0.492946	0.417018	0.075928	-0.21007
DEFA4	Gm10104	1669	100041688	0.400166	0.266012	0.134154	-0.209981
NPBWR1	Npbwr1	2831	226304	0.665033	0.545862	0.119171	-0.209893
GSTA5	Gsta1	221357	14857	0.400426	0.266624	0.133802	-0.209888
KLF12	Klf12	11278	16597	0.804222	0.58507	0.219152	-0.209792
NFKBIB	Nfkbib	4793	18036	0.590496	0.504696	0.0857999	-0.209695
GRAMD1B	Gramd1b	57476	235283	0.683484	0.553406	0.130078	-0.209582
ZADH2	Zadh2	284273	225791	0.564547	0.485199	0.0793483	-0.209288
WDR1	Wdr1	9948	22388	0.539188	0.463666	0.0755218	-0.20927
NINL	Ninl	22981	78177	0.656415	0.541816	0.1146	-0.209219
SMC1A	Smc1a	8243	24061	0.780056	0.581757	0.198299	-0.209091
RPL23	Rpl23	9349	65019	0.443882	0.351596	0.0922858	-0.208888
NDUFA5	Ndufa5	4698	68202	0.516577	0.442518	0.0740589	-0.208862
USP11	Usp11	8237	236733	0.585744	0.501221	0.0845234	-0.208807
LATS2	Lats2	26524	50523	0.680145	0.552554	0.127591	-0.208691
PTGIR	Ptgir	5739	19222	0.531558	0.457845	0.0737133	-0.208578
ZNF451	Zfp451	26036	98403	0.593997	0.507852	0.0861451	-0.208322
RGN	Rgn	9104	19733	0.432892	0.334282	0.0986102	-0.20832
ZNF585A	Zfp27	199704	22689	0.466488	0.383279	0.0832091	-0.208303
ZWILCH	Zwilch	55055	68014	0.417484	0.307756	0.109728	-0.208213
PCOLCE	Pcolce	5118	18542	0.463	0.37837	0.0846303	-0.208064
MRPL4	Mrpl4	51073	66163	0.635583	0.530995	0.104589	-0.207978
ALKBH4	Alkbh4	54784	72041	0.447651	0.357708	0.0899434	-0.207759
MEIS3	Meis3	56917	17537	0.477972	0.399618	0.0783541	-0.207696
NR6A1	Nr6a1	2649	14536	0.700222	0.560919	0.139303	-0.207445
PGF	Pgf	5228	18654	0.438095	0.344	0.0940953	-0.207392
SPATS2	Spats2	65244	72572	0.579493	0.497773	0.0817194	-0.20731
VWC2	Vwc2	375567	319922	0.716233	0.56714	0.149093	-0.207218
TMX1	Tmx1	81542	72736	0.446669	0.356827	0.0898415	-0.207051
CDK2	Cdk2	1017	12566	0.436028	0.340545	0.0954833	-0.20703
TRIM15	Trim15	89870	69097	0.438154	0.344408	0.093746	-0.207018
NLRP2	Nlrp2	55655	232827	0.448713	0.359128	0.0895847	-0.207004
TMEM109	Tmem109	79073	68539	0.43767	0.343597	0.0940739	-0.206909
PDS5A	Pds5a	23244	71521	0.619756	0.523707	0.0960487	-0.206802
POLA1	Pola1	5422	18968	0.621503	0.52479	0.0967133	-0.206724
PLA2G10	Pla2g10	8399	26565	0.458521	0.372745	0.0857755	-0.206363
GCK	Gck	2645	103988	0.536742	0.462896	0.0738455	-0.206359
RIPK3	Ripk3	11035	56532	0.499583	0.425435	0.0741481	-0.206314
B3GNT2	B3gnt2	10678	53625	0.484506	0.408171	0.0763351	-0.206309
PAK4	Pak4	10298	70584	0.638915	0.53373	0.105185	-0.206221
CYB5RL	Cyb5rl	606495	230582	0.391126	0.246984	0.144142	-0.206178
TNFRSF25	Tnfrsf25	8718	85030	0.599206	0.512221	0.0869857	-0.206132
MYL2	Myl2	4633	17906	0.451126	0.362989	0.0881373	-0.206
CNOT2	Cnot2	4848	72068	0.49083	0.416207	0.0746231	-0.20593
RBBP6	Rbbp6	5930	19647	0.694856	0.559827	0.13503	-0.205488
GLG1	Glg1	2734	20340	0.727884	0.572104	0.15578	-0.205413
ACSS3	Acss3	79611	380660	0.479032	0.402114	0.0769176	-0.20501
CLEC11A	Clec11a	6320	20256	0.696712	0.560861	0.135851	-0.204748
GCH1	Gch1	2643	14528	0.52979	0.457867	0.0719232	-0.204527
WIZ	Wiz	58525	22404	0.59392	0.509427	0.0844924	-0.204435
EDN3	Edn3	1908	13616	0.500158	0.427045	0.0731128	-0.204357
AGK	Agk	55750	69923	0.441135	0.350205	0.0909295	-0.204321
GABRA2	Gabra2	2555	14395	0.466135	0.385294	0.0808413	-0.204112
NDOR1	Ndor1	27158	78797	0.56556	0.488281	0.0772792	-0.204108
S1PR2	S1pr2	9294	14739	0.454627	0.368307	0.0863196	-0.204098
SPATA2L	Spata2l	124044	78779	0.514167	0.442294	0.0718728	-0.204007
PTH	Pth	5741	19226	0.349526	0.128971	0.220555	-0.203694
HSPB8	Hspb8	26353	80888	0.429024	0.329947	0.099077	-0.203648
KIAA1024	AF529169	23251	209743	0.63477	0.532395	0.102375	-0.203387
SLC15A4	Slc15a4	121260	100561	0.512676	0.441205	0.0714705	-0.203378
LMCD1	Lmcd1	29995	30937	0.479883	0.403923	0.0759593	-0.203282
GZMB	Gzmb	3002	14939	0.431767	0.335746	0.0960215	-0.203281
ATF5	Atf5	22809	107503	0.450715	0.363589	0.087126	-0.203163
AMY1C	Amy1	278	11722	0.415067	0.306887	0.10818	-0.202994
UBAC2	Ubac2	337867	68889	0.457663	0.373005	0.084658	-0.202894
SRSF10	Srsf10	10772	14105	0.631895	0.531295	0.1006	-0.202694
SV2B	Sv2b	9899	64176	0.854909	0.595722	0.259187	-0.202647
ILF3	Ilf3	3609	16201	0.686496	0.558315	0.128181	-0.202554
TRIP13	Trip13	9319	69716	0.461575	0.378848	0.0827274	-0.2025
AATF	Aatf	26574	56321	0.518297	0.446777	0.0715194	-0.202478
INPP5D	Inpp5d	3635	16331	0.612648	0.521634	0.091014	-0.202346
BCAP31	Bcap31	10134	27061	0.466099	0.38603	0.0800693	-0.202337
MAP3K15	Map3k15	389840	270672	0.645653	0.539133	0.10652	-0.202271
ISY1-RAB43	Isy1	100534599	57905	0.474123	0.396377	0.0777455	-0.202259
ZNF778	Zfp846	197320	244721	0.405947	0.2865	0.119447	-0.202075
HMGN5	Hmgn5	79366	50887	0.435578	0.343107	0.0924702	-0.20193
BLOC1S6	Bloc1s6	26258	18457	0.523774	0.453305	0.0704688	-0.201731
GATSL2	Gatsl2	729438	80909	0.68627	0.558513	0.127757	-0.201701
TSPAN13	Tspan13	27075	66109	0.540101	0.468112	0.071989	-0.201676
NMB	Nmb	4828	68039	0.470616	0.392553	0.0780638	-0.201579
SNX6	Snx6	58533	72183	0.520231	0.448989	0.0712421	-0.201556
MTG2	Mtg2	26164	52856	0.465269	0.3852	0.0800687	-0.201517
RBBP8NL	Rbbp8nl	140893	271887	0.48974	0.416747	0.0729923	-0.201477
NOL12	Nol12	79159	97961	0.423798	0.322314	0.101484	-0.201238
MKL2	Mkl2	57496	239719	0.687257	0.55903	0.128228	-0.201226
ABHD14B	Abhd14b	84836	76491	0.398055	0.269219	0.128836	-0.200939
ADIPOQ	Adipoq	9370	11450	0.432804	0.338549	0.0942557	-0.200935
SLA	Sla	6503	20491	0.437292	0.346249	0.0910428	-0.200897
EMCN	Emcn	51705	59308	0.418701	0.314159	0.104542	-0.200872
STYX	Styx	6815	56291	0.575467	0.497446	0.0780216	-0.200676
RRP1	Rrp1	8568	18114	0.55491	0.481405	0.073505	-0.200638
GNL1	Gnl1	2794	14670	0.742798	0.578668	0.16413	-0.200622
ZNF675	Zfp457	171392	431706	0.389496	0.247792	0.141704	-0.200611
FXYD4	Fxyd4	53828	108017	0.392828	0.255757	0.13707	-0.200598
FAM71B	Fam71b	153745	432552	0.485518	0.412451	0.073067	-0.200424
OR2L13	Olfr168	284521	258354	0.368692	0.198037	0.170655	-0.200243
YME1L1	Yme1l1	10730	27377	0.541008	0.469407	0.0716014	-0.200108
CNGA2	Cnga2	1260	12789	0.466274	0.387337	0.0789373	-0.200103
MVB12A	Mvb12a	93343	73711	0.633123	0.532972	0.100152	-0.200099
PDXK	Pdxk	8566	216134	0.754157	0.581147	0.17301	-0.200047
CSK	Csk	1445	12988	0.577334	0.499003	0.0783308	-0.200041
RNF11	Rnf11	26994	29864	0.500764	0.429361	0.0714033	-0.199839
HRC	Hrc	3270	15464	0.427692	0.33045	0.0972416	-0.199785
SURF4	Surf4	6836	20932	0.512101	0.442094	0.0700071	-0.199744
ST5	St5	6764	76954	0.552766	0.479708	0.0730582	-0.199694
ZMYM6NB	Gm12942	100506144	100039968	0.407848	0.294354	0.113494	-0.199627
CEND1	Cend1	51286	57754	0.489265	0.416961	0.0723049	-0.199505
PLIN4	Plin4	729359	57435	0.619526	0.526885	0.0926411	-0.199407
SULT2A1	Sult2a6	6822	629219	0.376375	0.216338	0.160037	-0.199125
MAGOHB	Magoh	55110	17149	0.500532	0.429548	0.0709839	-0.199024
NR1D2	Nr1d2	9975	353187	0.605363	0.519358	0.0860049	-0.198813
MFAP5	Mfap5	8076	50530	0.42821	0.331899	0.0963112	-0.198777
GBP6	Gbp8	163351	76074	0.421827	0.320722	0.101106	-0.198731
ST6GAL2	St6gal2	84620	240119	0.532858	0.462917	0.0699405	-0.198718
ZNF675	Zfp458	171392	238690	0.389496	0.249669	0.139827	-0.198696
UTP14C	Utp14a	9724	72554	0.514115	0.444465	0.0696498	-0.198545
NRROS	Nrros	375387	224109	0.503196	0.433251	0.0699454	-0.198543
SLC39A10	Slc39a10	57181	227059	0.495095	0.423995	0.0710998	-0.198533
MORC1	Morc1	27136	17450	0.467814	0.390416	0.0773983	-0.198505
BRD9	Brd9	65980	105246	0.569684	0.494306	0.0753772	-0.19828
C19orf38	AB124611	255809	382062	0.384342	0.23797	0.146372	-0.198279
SPINK5	Spink5	11005	72432	0.579599	0.501838	0.0777603	-0.198141
PCDHB9	Pcdhb18	56127	93889	0.585848	0.506286	0.079562	-0.197965
AGTR1	Agtr1a	185	11607	0.498464	0.427969	0.0704951	-0.197924
RRAS	Rras	6237	20130	0.522266	0.453177	0.0690889	-0.197908
HEBP2	Hebp2	23593	56016	0.469907	0.393705	0.0762027	-0.197703
ZNF675	Zfp708	171392	432769	0.389496	0.250518	0.138978	-0.197566
RFX2	Rfx2	5990	19725	0.668663	0.553015	0.115648	-0.197339
CABLES2	Cables2	81928	252966	0.521763	0.453129	0.0686341	-0.197098
OPTN	Optn	10133	71648	0.454757	0.372138	0.0826191	-0.197045
L2HGDH	L2hgdh	79944	217666	0.570799	0.495722	0.0750769	-0.197044
FZD10	Fzd10	11211	93897	0.619746	0.527682	0.0920641	-0.196924
ITGA8	Itga8	8516	241226	0.720859	0.574124	0.146735	-0.196906
KRT86	Krt83	3892	406219	0.500203	0.4303	0.069903	-0.196858
FAM114A1	Fam114a1	92689	68303	0.499915	0.429783	0.0701313	-0.1968
UTP11L	Utp11l	51118	67205	0.548415	0.477457	0.0709581	-0.196586
ZAR1L	Zar1l	646799	545824	0.414394	0.309589	0.104805	-0.196574
APOBEC4	Apobec4	403314	71281	0.374321	0.214627	0.159695	-0.196337
YPEL2	Ypel1	388403	106369	0.550024	0.478702	0.0713224	-0.196264
C3orf38	4930453N24Rik	285237	67609	0.527217	0.458639	0.0685785	-0.196229
CD96	Cd96	10225	84544	0.387589	0.247749	0.13984	-0.196229
TICAM1	Ticam1	148022	106759	0.44719	0.362588	0.084602	-0.196191
UBB	Ubb	7314	22187	0.604011	0.519514	0.0844969	-0.196152
TEX28	Tex28	1527	385380	0.352331	0.15051	0.201821	-0.196102
UBA6	Uba6	55236	231380	0.627171	0.531948	0.0952227	-0.195873
MTL5	Mtl5	9633	17771	0.498135	0.428447	0.0696883	-0.195754
EREG	Ereg	2069	13874	0.482268	0.41033	0.0719382	-0.195501
SENP7	Senp7	57337	66315	0.463415	0.38571	0.0777054	-0.195421
CDH9	Cdh9	1007	12565	0.478892	0.406375	0.0725162	-0.195356
ASB10	Asb10	136371	117590	0.483218	0.411613	0.0716055	-0.195325
LGALS3BP	Lgals3bp	3959	19039	0.476265	0.403021	0.0732437	-0.195303
TMEM184A	Tmem184a	202915	231832	0.584093	0.506331	0.0777614	-0.195282
RAB40C	Rab40c	57799	224624	0.483623	0.412539	0.0710841	-0.195061
TNFSF13	Tnfsf13	8741	69583	0.466625	0.390444	0.0761815	-0.195027
TGFBR1	Tgfbr1	7046	21812	0.648559	0.545081	0.103478	-0.19489
TSPAN8	Tspan8	7103	216350	0.394781	0.266325	0.128456	-0.194769
MRGPRX2	Mrgpra2b	117194	235712	0.37819	0.225605	0.152585	-0.194602
NLN	Nln	57486	75805	0.74983	0.58346	0.16637	-0.194291
ITM2A	Itm2a	9452	16431	0.421972	0.324158	0.0978144	-0.194152
CBX1	Cbx1	10951	12412	0.466696	0.391016	0.0756797	-0.19412
CD82	Cd82	3732	12521	0.425733	0.331012	0.0947214	-0.193966
SAMD10	Samd10	140700	229011	0.449686	0.366612	0.0830747	-0.193949
NOS1	Nos1	4842	18125	0.848036	0.600384	0.247653	-0.193792
FIGLA	Figla	344018	26910	0.435299	0.346899	0.0884006	-0.193713
IPO5	Ipo5	3843	70572	0.580054	0.504142	0.0759125	-0.193663
RBM5	Rbm5	10181	83486	0.497656	0.428806	0.0688504	-0.193619
SIRT5	Sirt5	23408	68346	0.52342	0.456434	0.0669856	-0.193584
CHRNA7	Chrna7	1139	11441	0.516278	0.448239	0.0680392	-0.193531
ST3GAL1	St3gal1	6482	20442	0.633889	0.537325	0.0965646	-0.193285
SKIDA1	Skida1	387640	72668	0.710709	0.572717	0.137992	-0.193221
MRPL20	Mrpl20	55052	66448	0.547368	0.47783	0.0695382	-0.193135
TMEM88	Tmem88	92162	67020	0.504906	0.437054	0.0678521	-0.193024
FNDC9	Fndc9	408263	320116	0.428501	0.336414	0.0920872	-0.19289
KIAA1919	2010001E11Rik	91749	72045	0.516303	0.448643	0.0676599	-0.192854
SCAMP1	Scamp1	9522	107767	0.589378	0.511175	0.0782029	-0.192845
HLA-F	H2-Q1	3134	15006	0.460221	0.38161	0.078611	-0.192667
MAG	Mag	4099	17136	0.521637	0.454428	0.0672094	-0.192488
KIF20B	Kif20b	9585	240641	0.623492	0.531389	0.0921029	-0.192479
SLC46A3	Slc46a3	283537	71706	0.545522	0.476409	0.0691131	-0.192378
PNPLA8	Pnpla8	50640	67452	0.500004	0.432177	0.0678266	-0.192357
ADAD2	Adad2	161931	75773	0.475023	0.402815	0.0722087	-0.192263
SLC16A4	Slc16a4	9122	229699	0.413238	0.309857	0.103381	-0.192134
KBTBD8	Kbtbd8	84541	243574	0.564028	0.492408	0.0716209	-0.192105
LONRF2	Lonrf2	164832	381338	0.921144	0.60614	0.315004	-0.192082
STIP1	Stip1	10963	20867	0.643394	0.543258	0.100136	-0.192082
UBA3	Uba3	9039	22200	0.465964	0.390922	0.0750419	-0.191984
APOL2	Apol9b	23780	71898	0.403378	0.289784	0.113594	-0.191982
ZNF14	Zfp867	7561	237775	0.446201	0.363425	0.082776	-0.191891
CHURC1	Churc1	91612	211151	0.448468	0.365818	0.0826504	-0.191873
AMY2A	Amy1	279	11722	0.411484	0.306887	0.104597	-0.191864
CHMP4C	Chmp4c	92421	66371	0.523691	0.457343	0.0663483	-0.191755
LAMP1	Lamp1	3916	16783	0.493059	0.42464	0.0684183	-0.191343
ALDOA	Aldoart2	226	79459	0.47767	0.406505	0.0711643	-0.191327
ACTC1	Actc1	70	11464	0.459534	0.380995	0.0785392	-0.191156
SLC9A2	Slc9a2	6549	226999	0.687764	0.564571	0.123193	-0.190977
CDKAL1	Cdkal1	54901	68916	0.419674	0.321981	0.0976928	-0.190768
ASB13	Asb13	79754	142688	0.455372	0.375635	0.0797368	-0.190472
MAGOH	Magoh	4116	17149	0.497122	0.429548	0.0675737	-0.190426
CDHR1	Cdhr1	92211	170677	0.490561	0.422322	0.0682383	-0.190293
KRT86	Krt81	3892	64818	0.500203	0.433733	0.0664702	-0.190179
GPR143	Gpr143	4935	18241	0.411678	0.308651	0.103027	-0.190078
TMEM168	Tmem168	64418	101118	0.727438	0.579982	0.147456	-0.190065
SDPR	Sdpr	8436	20324	0.519904	0.453552	0.0663516	-0.190045
SAV1	Sav1	60485	64010	0.563026	0.492364	0.0706613	-0.190044
C1R	C1ra	715	50909	0.415917	0.316272	0.0996447	-0.190035
PLEKHA4	Plekha4	57664	69217	0.559628	0.489762	0.0698665	-0.190022
NEK6	Nek6	10783	59126	0.485824	0.417662	0.0681617	-0.190022
FAM169A	Fam169a	26049	320557	0.541946	0.474245	0.0677013	-0.189997
CNTN4	Cntn4	152330	269784	0.514661	0.448504	0.0661572	-0.189706
OR2L13	Olfr166	284521	259071	0.368692	0.208721	0.159971	-0.189587
ATP4B	Atp4b	496	11945	0.425565	0.333681	0.0918839	-0.189514
ARFRP1	Arfrp1	10139	76688	0.438346	0.354598	0.0837481	-0.189264
PDGFRL	Pdgfrl	5157	68797	0.454676	0.375327	0.079349	-0.189173
TRIQK	Triqk	286144	208820	0.425964	0.334691	0.0912729	-0.189148
CERS6	Cers6	253782	241447	0.61263	0.527389	0.0852411	-0.188981
BCLAF1	Bclaf1	9774	72567	0.697902	0.569482	0.128421	-0.188959
HOXD8	Hoxd8	3234	15437	0.704172	0.572389	0.131783	-0.188957
PTGS2	Ptgs2	5743	19225	0.456187	0.37733	0.0788564	-0.188929
HAMP	Hamp	57817	84506	0.47106	0.399653	0.0714073	-0.188925
TIMM23	Timm23	100287932	53600	0.508362	0.442725	0.0656361	-0.188854
CCDC80	Ccdc80	151887	67896	0.560473	0.491129	0.0693442	-0.188665
MRGPRX2	Mrgpra2a	117194	668727	0.37819	0.231592	0.146598	-0.188611
SYT2	Syt2	127833	20980	0.617975	0.530054	0.0879214	-0.188518
ZNF90	Zfp457	7643	431706	0.384465	0.247792	0.136673	-0.188479
SF3A2	Sf3a2	8175	20222	0.42242	0.328242	0.0941786	-0.188324
ZNF804B	Zfp804b	219578	207618	0.484229	0.416533	0.0676962	-0.188299
ALDH1A1	Aldh1a1	216	11668	0.383523	0.245857	0.137667	-0.188255
SLC26A1	Slc26a1	10861	231583	0.434061	0.347817	0.0862436	-0.188158
SLC5A4	Slc5a4a	6527	64452	0.424296	0.332238	0.0920582	-0.18805
CBL	Cbl	867	12402	0.835735	0.602639	0.233095	-0.188048
HES5	Hes5	388585	15208	0.562196	0.492743	0.0694531	-0.188027
IL6ST	Il6st	3572	16195	0.732821	0.582697	0.150124	-0.187926
FSTL1	Fstl1	11167	14314	0.501024	0.435499	0.0655242	-0.18762
LIG1	Lig1	3978	16881	0.536727	0.471169	0.0655587	-0.187547
PAK1	Pak1	5058	18479	0.494547	0.427971	0.0665758	-0.187536
VBP1	Vbp1	7411	22327	0.427519	0.338081	0.0894378	-0.187472
LHB	Lhb	3972	16866	0.362873	0.194609	0.168265	-0.187373
ALDH1A3	Aldh1a3	220	56847	0.515052	0.449928	0.065124	-0.187365
EIF4A3	Eif4a3	9775	192170	0.628389	0.537112	0.0912768	-0.187194
GPR155	Gpr155	151556	68526	0.710982	0.576359	0.134623	-0.18704
SLC26A11	Slc26a11	284129	268512	0.447204	0.366752	0.0804517	-0.187011
TCEB1	Tceb1	6921	67923	0.411563	0.310152	0.101411	-0.186948
OPRL1	Oprl1	4987	18389	0.410486	0.30821	0.102276	-0.186746
DGKD	Dgkd	8527	227333	0.704858	0.573876	0.130982	-0.186745
MME	Mme	4311	17380	0.586001	0.511219	0.0747825	-0.186733
PTGDS	Ptgds	5730	19215	0.373535	0.22235	0.151186	-0.186732
ARRDC4	Arrdc4	91947	66412	0.579209	0.507063	0.0721463	-0.186715
P2RY12	P2ry12	64805	70839	0.393128	0.269199	0.12393	-0.186633
CD200R1	Cd200r1	131450	57781	0.399457	0.284705	0.114752	-0.186614
ACR	Acr	49	11434	0.538232	0.473025	0.065207	-0.186601
ZNF90	Zfp458	7643	238690	0.384465	0.249669	0.134796	-0.186563
CAMK1	Camk1	8536	52163	0.410628	0.308588	0.102039	-0.186533
SCN3B	Scn3b	55800	235281	0.554422	0.486922	0.0675001	-0.186519
DPY19L4	Dpy19l4	286148	381510	0.629265	0.537906	0.0913587	-0.18639
FMNL3	Fmnl3	91010	22379	0.784281	0.596326	0.187956	-0.186312
NDNL2	1700020D05Rik	56160	75555	0.589562	0.514196	0.0753653	-0.186304
KIAA1211L	2010300C02Rik	343990	72097	0.720245	0.579448	0.140797	-0.1863
MNDA	Ifi205	4332	226695	0.366743	0.206591	0.160151	-0.186167
COMMD6	Commd6	170622	66200	0.386449	0.253782	0.132667	-0.186158
DDX4	Ddx4	54514	13206	0.463834	0.390968	0.0728667	-0.186035
IFIT1	Ifit1	3434	15957	0.470961	0.400857	0.0701034	-0.185968
PTBP2	Ptbp2	58155	56195	0.547919	0.481598	0.066321	-0.185811
ZNF14	Gm10778	7561	100233208	0.446201	0.366145	0.080056	-0.185802
TNFSF9	Tnfsf9	8744	21950	0.552771	0.485677	0.067094	-0.1858
SLC4A1AP	Slc4a1ap	22950	20534	0.569164	0.499282	0.0698824	-0.185794
FGF9	Fgf9	2254	14180	0.590102	0.514792	0.0753105	-0.185777
SPTLC3	Sptlc3	55304	228677	0.469847	0.399846	0.0700013	-0.185653
GAK	Gak	2580	231580	0.667751	0.558883	0.108868	-0.185622
RBM10	Rbm10	8241	236732	0.625698	0.536467	0.089231	-0.185573
BRIP1	Brip1	83990	237911	0.70267	0.573317	0.129353	-0.185523
A3GALT2	A3galt2	127550	215493	0.628558	0.537917	0.0906415	-0.185497
CCDC138	Ccdc138	165055	76138	0.4073	0.304042	0.103258	-0.185447
ZNF90	Zfp708	7643	432769	0.384465	0.250518	0.133947	-0.185434
SCARF1	Scarf1	8578	380713	0.58463	0.511021	0.0736091	-0.185417
MMP16	Mmp16	4325	17389	0.621103	0.53277	0.0883335	-0.185417
ME2	Me2	4200	107029	0.553456	0.486533	0.0669231	-0.185331
SH3BGRL	Sh3bgrl	6451	56726	0.461092	0.387245	0.0738477	-0.185316
FIZ1	Fiz1	84922	23877	0.592942	0.517139	0.0758026	-0.18529
EXOC4	Exoc4	60412	20336	0.46079	0.386889	0.0739002	-0.185054
ARL11	Arl11	115761	219144	0.375835	0.228935	0.1469	-0.185015
ARHGEF3	Arhgef3	50650	71704	0.531464	0.467719	0.0637451	-0.184946
GPC4	Gpc4	2239	14735	0.538397	0.473661	0.0647362	-0.184893
FCGRT	Fcgrt	2217	14132	0.439999	0.358859	0.08114	-0.184859
FAM162B	Fam162b	221303	77296	0.49391	0.428235	0.0656754	-0.184851
PRB2	Gm8882	653247	667929	0.342886	0.136364	0.206522	-0.18473
SIK2	Sik2	23235	235344	0.582692	0.510182	0.0725098	-0.184642
LRRC2	Lrrc2	79442	74249	0.533192	0.469604	0.063588	-0.184569
CAPN1	Capn1	823	12333	0.552507	0.485843	0.0666639	-0.184529
EXOSC1	Exosc1	51013	66583	0.416961	0.32156	0.095401	-0.184504
SLC36A4	Slc36a4	120103	234967	0.581286	0.509264	0.0720215	-0.184418
GABRD	Gabrd	2563	14403	0.46293	0.39054	0.0723893	-0.184225
KIAA0408	9330159F19Rik	9729	212448	0.727138	0.583002	0.144136	-0.184158
SLC2A12	Slc2a12	154091	353169	0.532537	0.469125	0.0634121	-0.184138
FAM160A1	Fam160a1	729830	229488	0.50781	0.443761	0.0640489	-0.184134
KIAA1841	0610010F05Rik	84542	71675	0.526615	0.462699	0.0639157	-0.184014
ZNF257	Zfp457	113835	431706	0.382699	0.247792	0.134907	-0.183942
TEX12	Tex12	56158	66654	0.500865	0.436772	0.064093	-0.183935
PRR16	Prr16	51334	71373	0.444944	0.365411	0.0795327	-0.183846
PCDHB10	Pcdhb18	56126	93889	0.577181	0.506286	0.0708945	-0.18367
C2orf49	AI597479	79074	98404	0.546152	0.481009	0.0651434	-0.183472
KDM4C	Kdm4c	23081	76804	0.545361	0.48036	0.0650004	-0.183415
NCR1	Ncr1	9437	17086	0.3874	0.258302	0.129098	-0.183368
GLUL	Glul	2752	14645	0.606454	0.526989	0.0794647	-0.183299
TRPM7	Trpm7	54822	58800	0.755482	0.591352	0.16413	-0.183243
OAS3	Oas3	4940	246727	0.59002	0.51608	0.0739403	-0.183167
C3orf62	1700102P08Rik	375341	112418	0.42748	0.340605	0.0868748	-0.18309
ANGEL2	Angel2	90806	52477	0.522687	0.459711	0.0629763	-0.182986
SLX4	Slx4	84464	52864	0.708335	0.57739	0.130946	-0.18298
ZNF467	Zfp467	168544	68910	0.674977	0.563406	0.111572	-0.182879
HSPA8	Hspa8	3312	15481	0.414448	0.318606	0.095842	-0.182785
MYBL1	Mybl1	4603	17864	0.589696	0.516181	0.0735151	-0.182658
LRRTM3	Lrrtm3	347731	216028	0.598091	0.521715	0.0763762	-0.182478
MRGPRX2	Mrgpra1	117194	233221	0.37819	0.238296	0.139894	-0.182472
F2RL3	F2rl3	9002	14065	0.425502	0.337817	0.087685	-0.182428
ELK4	Elk4	2005	13714	0.693132	0.571195	0.121937	-0.182418
SOD3	Sod3	6649	20657	0.678735	0.565387	0.113348	-0.182387
CPB1	Cpb1	1360	76703	0.450972	0.374167	0.0768047	-0.182203
CYHR1	Cyhr1	50626	54151	0.48005	0.413786	0.0662634	-0.182198
RABL2B	Rabl2	11158	68708	0.517192	0.45408	0.0631125	-0.182196
C6orf141	9130008F23Rik	135398	71583	0.499938	0.43658	0.0633583	-0.182173
CSAD	Csad	51380	246277	0.449809	0.372918	0.0768913	-0.182086
ZNF257	Zfp458	113835	238690	0.382699	0.249669	0.13303	-0.182027
ARF1	Arf1	375	11840	0.51825	0.45571	0.0625402	-0.18194
EIF3M	Eif3m	10480	98221	0.424439	0.336553	0.087886	-0.181898
OTC	Otc	5009	18416	0.379939	0.243368	0.136571	-0.18183
OR11H4	Olfr747	390442	258264	0.387997	0.261776	0.126221	-0.181615
ASRGL1	Asrgl1	80150	66514	0.49203	0.427653	0.0643763	-0.181574
PDP2	Pdp2	57546	382051	0.614323	0.530957	0.0833661	-0.181544
HSF2BP	Hsf2bp	11077	74377	0.499754	0.436547	0.063207	-0.181533
PLCB4	Plcb4	5332	18798	0.596691	0.521043	0.0756472	-0.181532
SEC23B	Sec23b	10483	27054	0.434839	0.352146	0.0826933	-0.181395
SLC25A32	Slc25a32	81034	69906	0.578325	0.508648	0.0696764	-0.181386
PPP6R2	Ppp6r2	9701	71474	0.529992	0.467941	0.0620515	-0.18135
HTR2A	Htr2a	3356	15558	0.489471	0.424499	0.0649724	-0.181341
CALCR	Calcr	799	12311	0.470569	0.402432	0.0681367	-0.181332
SATL1	Satl1	340562	73809	0.356615	0.181309	0.175306	-0.181152
IL7R	Il7r	3575	16197	0.44627	0.36867	0.0776004	-0.181147
HNRNPDL	Hnrnpdl	9987	50926	0.602767	0.525491	0.0772761	-0.181145
C2orf82	3110079O15Rik	389084	73234	0.777834	0.597796	0.180038	-0.181079
APOL2	Apol10b	23780	328561	0.403378	0.298638	0.10474	-0.18103
ZNF257	Zfp708	113835	432769	0.382699	0.250518	0.132181	-0.180898
ZNF823	AI987944	55552	233168	0.392832	0.272967	0.119865	-0.18086
MSTN	Mstn	2660	17700	0.442457	0.363778	0.0786795	-0.180838
PMS2	Pms2	5395	18861	0.480331	0.414863	0.0654682	-0.180621
SCIMP	Scimp	388325	327957	0.382029	0.249641	0.132388	-0.180543
RPF2	Rpf2	84154	67239	0.512536	0.450337	0.0621985	-0.18051
ZFP3	Zfp3	124961	193043	0.416178	0.322892	0.0932867	-0.180359
ZCCHC18	Zcchc12	644353	72693	0.485401	0.420961	0.0644396	-0.180354
NEK7	Nek7	140609	59125	0.54555	0.481713	0.0638367	-0.180305
ZNF92	Zfp273	168374	212569	0.399667	0.290278	0.109389	-0.180277
RNF13	Rnf13	11342	24017	0.394904	0.279279	0.115624	-0.180209
ATRAID	Atraid	51374	381629	0.430951	0.34761	0.0833412	-0.180096
CXCL2	Cxcl2	2920	20310	0.39606	0.282114	0.113946	-0.180055
NEIL1	Neil1	79661	72774	0.450029	0.373913	0.0761164	-0.179958
APOL2	Apol9a	23780	223672	0.403378	0.299955	0.103423	-0.179508
KHDC1L	Khdc1c	100129128	433278	0.376802	0.237609	0.139192	-0.179464
IGBP1	Igbp1	3476	18518	0.422603	0.335078	0.0875251	-0.179423
GNA11	Gna11	2767	14672	0.662088	0.558991	0.103097	-0.179371
ARL6IP5	Arl6ip5	10550	65106	0.502861	0.440469	0.0623916	-0.179227
ARHGEF6	Arhgef6	9459	73341	0.488211	0.424117	0.0640941	-0.179038
PSMA2	Psma2	5683	19166	0.433655	0.352076	0.0815785	-0.178951
HNF4G	Hnf4g	3174	30942	0.500234	0.438223	0.0620111	-0.178748
LRFN5	Lrfn5	145581	238205	0.519899	0.458359	0.06154	-0.178697
ZDHHC23	Zdhhc23	254887	332175	0.482515	0.418354	0.0641618	-0.178666
VANGL1	Vangl1	81839	229658	0.714211	0.581639	0.132572	-0.178648
PLB1	Plb1	151056	665270	0.522834	0.461789	0.0610458	-0.178399
ARC	Arc	23237	11838	0.516845	0.455682	0.0611629	-0.178297
API5	Api5	8539	11800	0.526746	0.465083	0.061663	-0.178245
NPEPPS	Npepps	9520	19155	0.595136	0.5216	0.0735368	-0.178229
PIR	Pir	8544	69656	0.422518	0.335753	0.0867642	-0.178124
SNTB1	Sntb1	6641	20649	0.528162	0.467534	0.0606285	-0.177992
PROX1	Prox1	5629	19130	0.776764	0.599667	0.177097	-0.177854
TRAPPC10	Trappc10	7109	216131	0.681857	0.568766	0.11309	-0.177794
TRAP1	Trap1	10131	68015	0.45091	0.376116	0.0747942	-0.177772
MRPS31	Mrps31	10240	57312	0.465039	0.39656	0.0684797	-0.17767
CES5A	Ces5a	221223	67935	0.439451	0.361579	0.0778717	-0.177647
DPH3	Dph3	285381	105638	0.455572	0.382524	0.0730481	-0.177645
AMMECR1L	Ammecr1l	83607	225339	0.503189	0.441918	0.0612711	-0.177177
EEF1A1	Eef1a1	1915	13627	0.501199	0.439699	0.0615005	-0.177158
SNX5	Snx5	27131	69178	0.5101	0.449476	0.0606239	-0.177037
TMEM123	Tmem123	114908	71929	0.477381	0.412817	0.0645638	-0.17702
ASCC2	Ascc2	84164	75452	0.503694	0.442366	0.061328	-0.177019
RXRA	Rxra	6256	20181	0.640627	0.549126	0.0915012	-0.176883
ZBTB38	Zbtb38	253461	245007	0.730711	0.588573	0.142138	-0.176786
ERC1	Erc1	23085	111173	0.783997	0.60167	0.182327	-0.17677
CD320	Cd320	51293	54219	0.460483	0.390384	0.0700996	-0.176762
PSMD11	Psmd11	5717	69077	0.536314	0.475225	0.0610893	-0.17665
NDEL1	Ndel1	81565	83431	0.471144	0.405422	0.065722	-0.176561
OBFC1	Obfc1	79991	108689	0.577424	0.509723	0.0677008	-0.17648
TRAPPC2	Trappc2	6399	66226	0.444773	0.369091	0.0756823	-0.176349
MNDA	Ifi204	4332	15951	0.366743	0.216477	0.150266	-0.176346
DDX56	Ddx56	54606	52513	0.509922	0.44954	0.0603822	-0.176313
MS4A1	Ms4a1	931	12482	0.386647	0.26368	0.122967	-0.176176
GLCE	Glce	26035	93683	0.50678	0.445991	0.0607889	-0.175955
THUMPD3	Thumpd3	25917	14911	0.437013	0.358869	0.0781439	-0.175896
TUBA1A	Tuba1a	7846	22142	0.455981	0.384171	0.0718095	-0.175788
CPNE2	Cpne2	221184	234577	0.517203	0.457058	0.0601448	-0.175767
CYTH4	Cyth4	27128	72318	0.495052	0.434005	0.061047	-0.17569
FBXL12	Fbxl12	54850	30843	0.445361	0.370024	0.0753369	-0.175673
DDX19A	Ddx19a	55308	13680	0.509807	0.449718	0.0600894	-0.175502
PRM2	Prm2	5620	19119	0.512653	0.452943	0.0597108	-0.175182
RBM12B	Rbm12b2	389677	77604	0.51962	0.459302	0.060318	-0.175012
LRRC40	Lrrc40	55631	67144	0.474316	0.409698	0.0646185	-0.175006
EFEMP1	Efemp1	2202	216616	0.398641	0.29246	0.106181	-0.174999
LRRC8B	Lrrc8b	23507	433926	0.668142	0.564572	0.103571	-0.174682
DNAJC10	Dnajc10	54431	66861	0.548335	0.486521	0.0618141	-0.174669
ZNF92	Zfp58	168374	238693	0.399667	0.295176	0.104491	-0.17463
HSPE1	Hspe1	3336	15528	0.644143	0.55208	0.0920636	-0.174581
TMEM68	Tmem68	137695	72098	0.433778	0.355366	0.0784121	-0.174564
AMY2B	Amy1	280	11722	0.405898	0.306887	0.0990114	-0.174563
IZUMO4	Izumo4	113177	71564	0.440193	0.364054	0.0761391	-0.174548
PRKAB2	Prkab2	5565	108097	0.514074	0.454361	0.059713	-0.174226
PIGG	Pigg	54872	433931	0.539607	0.478716	0.0608905	-0.174166
RAB33A	Rab33a	9363	19337	0.629279	0.544353	0.0849265	-0.173875
TATDN3	Tatdn3	128387	68972	0.427912	0.346492	0.0814202	-0.17379
TMEM87B	Tmem87b	84910	72477	0.57048	0.505775	0.0647056	-0.173782
CYP4F11	Cyp4f14	57834	64385	0.421624	0.336876	0.0847485	-0.173491
MED22	Med22	6837	20933	0.510576	0.451418	0.0591579	-0.173392
MPHOSPH8	Mphosph8	54737	75339	0.598167	0.526085	0.072082	-0.173362
SPSB3	Spsb3	90864	79043	0.547221	0.486113	0.0611084	-0.173232
FDFT1	Fdft1	2222	14137	0.461058	0.393092	0.0679665	-0.173231
ZDHHC3	Zdhhc3	51304	69035	0.86963	0.614821	0.254809	-0.173184
SPAG6	Spag6	9576	50525	0.461196	0.393299	0.0678974	-0.173053
DNASE1L1	Dnase1l1	1774	69537	0.391512	0.27746	0.114052	-0.17291
LYNX1	Lynx1	66004	23936	0.45996	0.391288	0.0686717	-0.172909
IBA57	Iba57	200205	216792	0.60398	0.529255	0.0747241	-0.172766
KCND2	Kcnd2	3751	16508	0.636653	0.548858	0.0877945	-0.172725
RNLS	Rnls	55328	67795	0.37664	0.243966	0.132674	-0.172549
ATP6V1G3	Atp6v1g3	127124	338375	0.394277	0.284607	0.109671	-0.172459
ABHD5	Abhd5	51099	67469	0.628881	0.544869	0.084012	-0.172369
PSEN1	Psen1	5663	19164	0.518049	0.459033	0.059016	-0.172271
PELI1	Peli1	57162	67245	0.54344	0.48295	0.0604901	-0.172264
PSME3	Psme3	10197	19192	0.491582	0.431329	0.0602531	-0.172243
MRO	Mro	83876	71263	0.46872	0.40455	0.0641697	-0.172225
BEX4	Bex6	56271	328660	0.400081	0.297921	0.10216	-0.172201
MNDA	Mndal	4332	100040462	0.366743	0.220001	0.146742	-0.172171
CFH	Gm4788	3075	214403	0.408395	0.313756	0.0946397	-0.172073
GCNT1	Gcnt1	2650	14537	0.563705	0.500652	0.0630526	-0.172067
RBM46	Rbm46	166863	633285	0.547886	0.487252	0.0606341	-0.172046
PDPK1	Pdpk1	5170	18607	0.700986	0.580174	0.120812	-0.172044
ECHS1	Echs1	1892	93747	0.369884	0.229005	0.14088	-0.17199
ARL6IP1	Arl6ip1	23204	54208	0.4799	0.418121	0.0617786	-0.171905
GSTA3	Gsta2	2940	14858	0.401807	0.301724	0.100084	-0.171894
MRPS16	Mrps16	51021	66242	0.366355	0.21922	0.147135	-0.171786
ACD	Acd	65057	497652	0.420638	0.336441	0.0841964	-0.171481
ZNF511	Zfp511	118472	69752	0.450307	0.378374	0.0719336	-0.171461
APBA3	Apba3	9546	57267	0.543397	0.483411	0.0599856	-0.171376
TPRG1	Tprg	285386	71338	0.378236	0.249061	0.129175	-0.171328
STK24	Stk24	8428	223255	0.678344	0.570983	0.107361	-0.171315
GFY	Gfy	100507003	100039953	0.500643	0.441747	0.058896	-0.171198
GYS2	Gys2	2998	232493	0.473899	0.410779	0.0631204	-0.171043
TTC9	Ttc9	23508	69480	0.584446	0.517184	0.0672616	-0.170946
POLR3A	Polr3a	11128	218832	0.658671	0.561646	0.0970251	-0.17088
TIMP3	Timp3	7078	21859	0.625384	0.543494	0.0818897	-0.170804
SNRPB2	Snrpb2	6629	20639	0.414848	0.327231	0.0876171	-0.170704
HEPHL1	Hephl1	341208	244698	0.57375	0.509812	0.0639386	-0.170689
GNAO1	Gnao1	2775	14681	0.680931	0.572465	0.108466	-0.170612
DEFA4	Defa2	1669	100294660	0.400166	0.299171	0.100995	-0.170595
PURG	Purg	29942	75029	0.480659	0.419515	0.0611446	-0.170518
MTRF1	Mtrf1	9617	211253	0.429968	0.351498	0.0784702	-0.17042
SPATA31A1	Spata31	647060	78124	0.396564	0.29134	0.105225	-0.170399
CCDC106	Ccdc106	29903	232821	0.710305	0.584785	0.12552	-0.170345
ASUN	Asun	55726	71177	0.585683	0.518111	0.0675715	-0.170295
TNFAIP8L1	Tnfaip8l1	126282	66443	0.482517	0.422048	0.0604688	-0.170272
RCOR2	Rcor2	283248	104383	0.490941	0.431377	0.0595638	-0.170197
MYLK4	Mylk4	340156	238564	0.597774	0.526957	0.0708175	-0.170146
ALDH3A1	Aldh3a1	218	11670	0.439045	0.364528	0.0745172	-0.170106
SQLE	Sqle	6713	20775	0.543754	0.484559	0.0591943	-0.170067
UCKL1	Uckl1	54963	68556	0.471226	0.408303	0.0629231	-0.17004
SLC7A6	Slc7a6	9057	330836	0.468681	0.405671	0.0630102	-0.170007
PTGFR	Ptgfr	5737	19220	0.505843	0.44719	0.0586523	-0.169771
HDAC4	Hdac4	9759	208727	0.847775	0.615006	0.232768	-0.169725
NEK4	Nek4	6787	23955	0.47515	0.413518	0.0616317	-0.169702
SPN	Spn	6693	20737	0.506227	0.447645	0.0585812	-0.169654
KRTAP13-4	Krtap13	284827	16699	0.374512	0.242885	0.131627	-0.169518
MFSD6	Mfsd6	54842	98682	0.588224	0.520308	0.067916	-0.169449
IFITM3	Ifitm3	10410	66141	0.342292	0.156575	0.185717	-0.169434
DEFA4	Defa20	1669	68009	0.400166	0.300325	0.0998415	-0.169417
C14orf1	0610007P14Rik	11161	58520	0.407015	0.312514	0.0945015	-0.16941
IFNGR2	Ifngr2	3460	15980	0.575838	0.511617	0.0642209	-0.169181
ZBTB24	Zbtb24	9841	268294	0.506009	0.447623	0.0583862	-0.169169
NFKBID	Nfkbid	84807	243910	0.490033	0.430255	0.0597782	-0.169158
CD164	Cd164	8763	53599	0.499449	0.441299	0.0581504	-0.16911
SPATA31D4	Spata31d1c	389761	238683	0.374202	0.242491	0.131711	-0.168965
MLLT3	Mllt3	4300	70122	0.655549	0.561368	0.094181	-0.168956
EMC9	Emc9	51016	85308	0.522534	0.465021	0.0575133	-0.168841
RAB11FIP2	Rab11fip2	22841	74998	0.601402	0.529298	0.0721044	-0.168771
RPH3AL	Rph3al	9501	380714	0.434597	0.358584	0.0760128	-0.168738
CREB3L2	Creb3l2	64764	208647	0.549914	0.490442	0.0594721	-0.168696
AMY1C	Amy2a2	278	100043688	0.415067	0.328502	0.0865646	-0.168618
CLRN2	Clrn2	645104	624224	0.384037	0.264672	0.119364	-0.168502
ALB	Alb	213	11657	0.524016	0.467404	0.0566113	-0.168419
ARMC1	Armc1	55156	74252	0.462884	0.398604	0.0642805	-0.168344
HSCB	Hscb	150274	100900	0.429179	0.351265	0.0779144	-0.168225
GSTA3	Gm10639	2940	100042314	0.401807	0.304378	0.0974296	-0.168211
MRGPRX2	Mrgpra4	117194	235854	0.37819	0.251734	0.126456	-0.168133
YIPF5	Yipf5	81555	67180	0.438814	0.365237	0.0735774	-0.168098
GSTA5	Gsta2	221357	14858	0.400426	0.301724	0.0987022	-0.168096
DERL1	Derl1	79139	67819	0.499199	0.441565	0.057634	-0.167888
PITRM1	Pitrm1	10531	69617	0.556097	0.496594	0.0595022	-0.167847
[truncated: 14,626 more rows]
